# Supplementary material for: Expanding the structure–activity relationships of alkynyl diphenylurea scaffold as promising antibacterial agents
Source: Royal Society of Chemistry journal article supplement (doi:10.1039/d2md00351a), 2022-11-30
Supplement: d2md00351a1.pdf [file d2md00351a1.pdf]

## Expanding the Structure-Activity Relationships of Alkynyl Diphenylurea Scaffold as Promising Antibacterial Agents

Hanzada T. Nour El-Din<sup>a||</sup>, Mohamed M. Elsebaie<sup>b||</sup>, Nader S. Abutaleb<sup>c,d</sup>, Ahmed M. Kotb<sup>b</sup>,  
Ahmed S. Attia<sup>a,e</sup>, Mohamed N. Seleem<sup>c,f\*</sup>, and Abdelrahman S. Mayhoub<sup>b,g\*</sup>

<sup>a</sup> Department of Microbiology and Immunology, Faculty of Pharmacy, Cairo University, Cairo 11562, Egypt

<sup>b</sup> Department of Pharmaceutical Organic Chemistry, College of Pharmacy, Al-Azhar University, Cairo 11884, Egypt.

<sup>c</sup> Department of Biomedical Sciences and Pathobiology, Virginia-Maryland College of Veterinary Medicine, Virginia Polytechnic Institute and State University, Blacksburg, Virginia 24061, United States of America.

<sup>d</sup> Department of Microbiology and Immunology, Faculty of Pharmacy, Zagazig University, Zagazig 44519, Egypt

<sup>e</sup> Department of Microbiology and Immunology, School of Pharmacy, Newgiza University, Giza, Egypt.

<sup>f</sup> Center for One Health Research, Virginia Polytechnic Institute and State University, Blacksburg, Virginia 24061, United States of America.

<sup>g</sup> Nanoscience Program, University of Science and Technology, Zewail City of Science and Technology, Giza, Egypt.

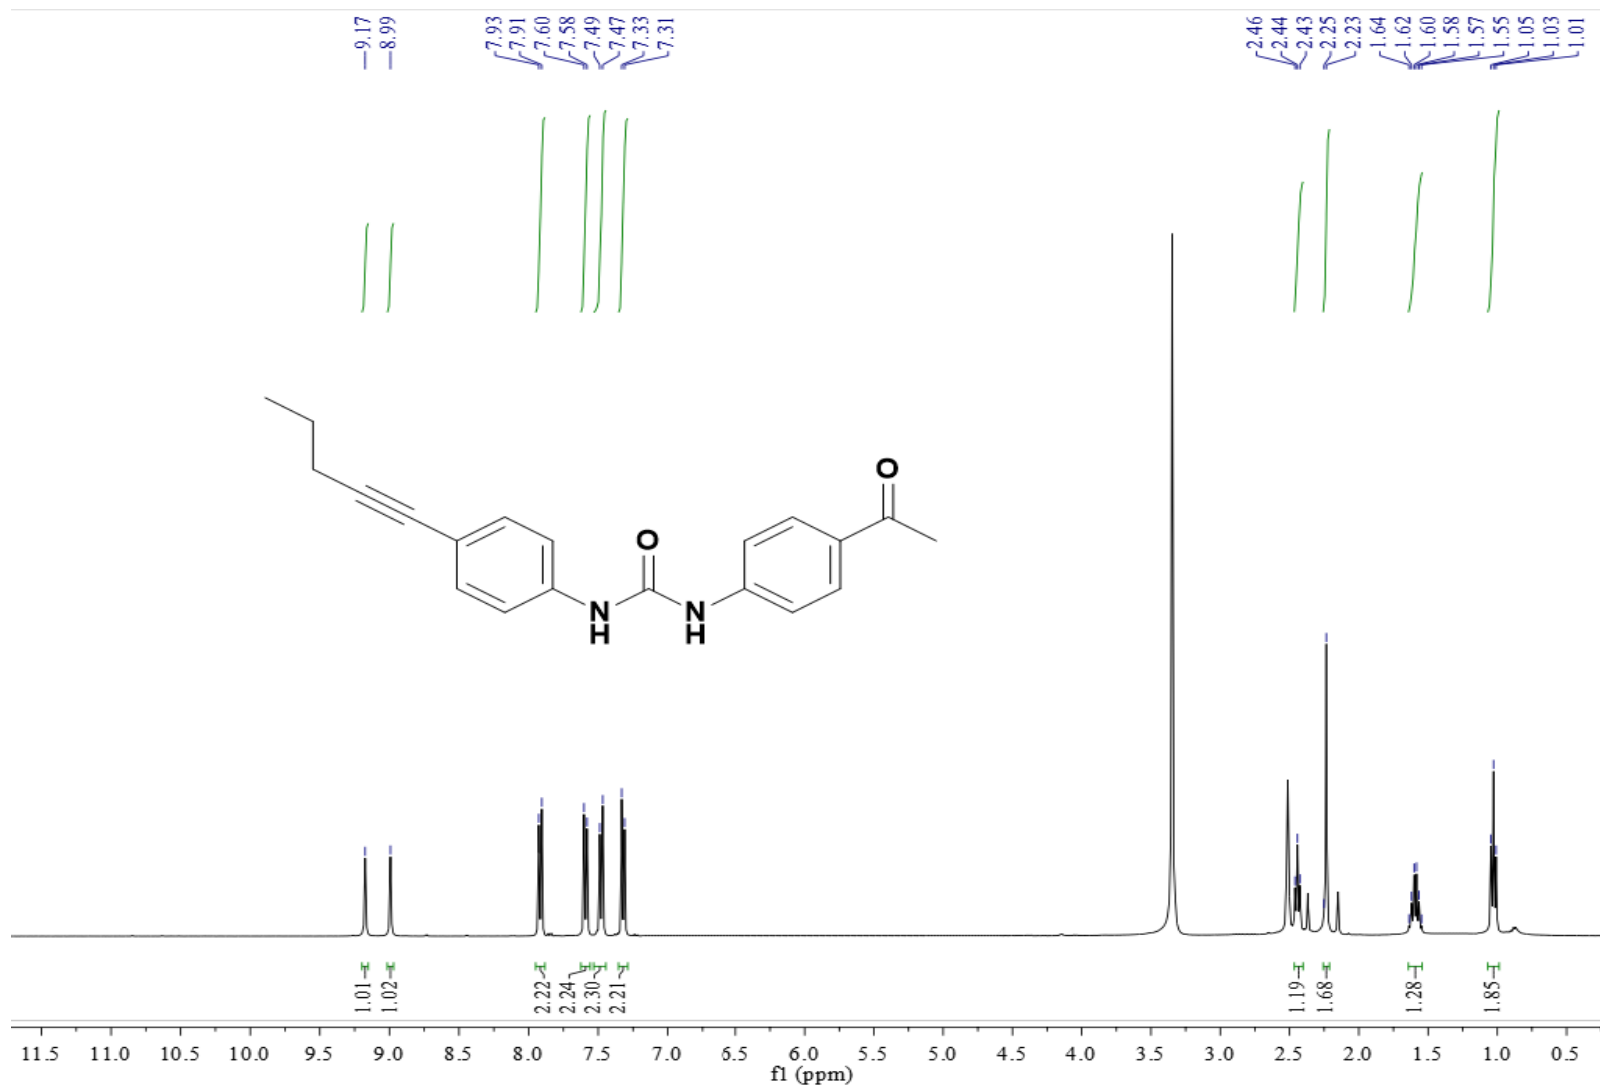

**<sup>1</sup>H NMR of compound (4a)**

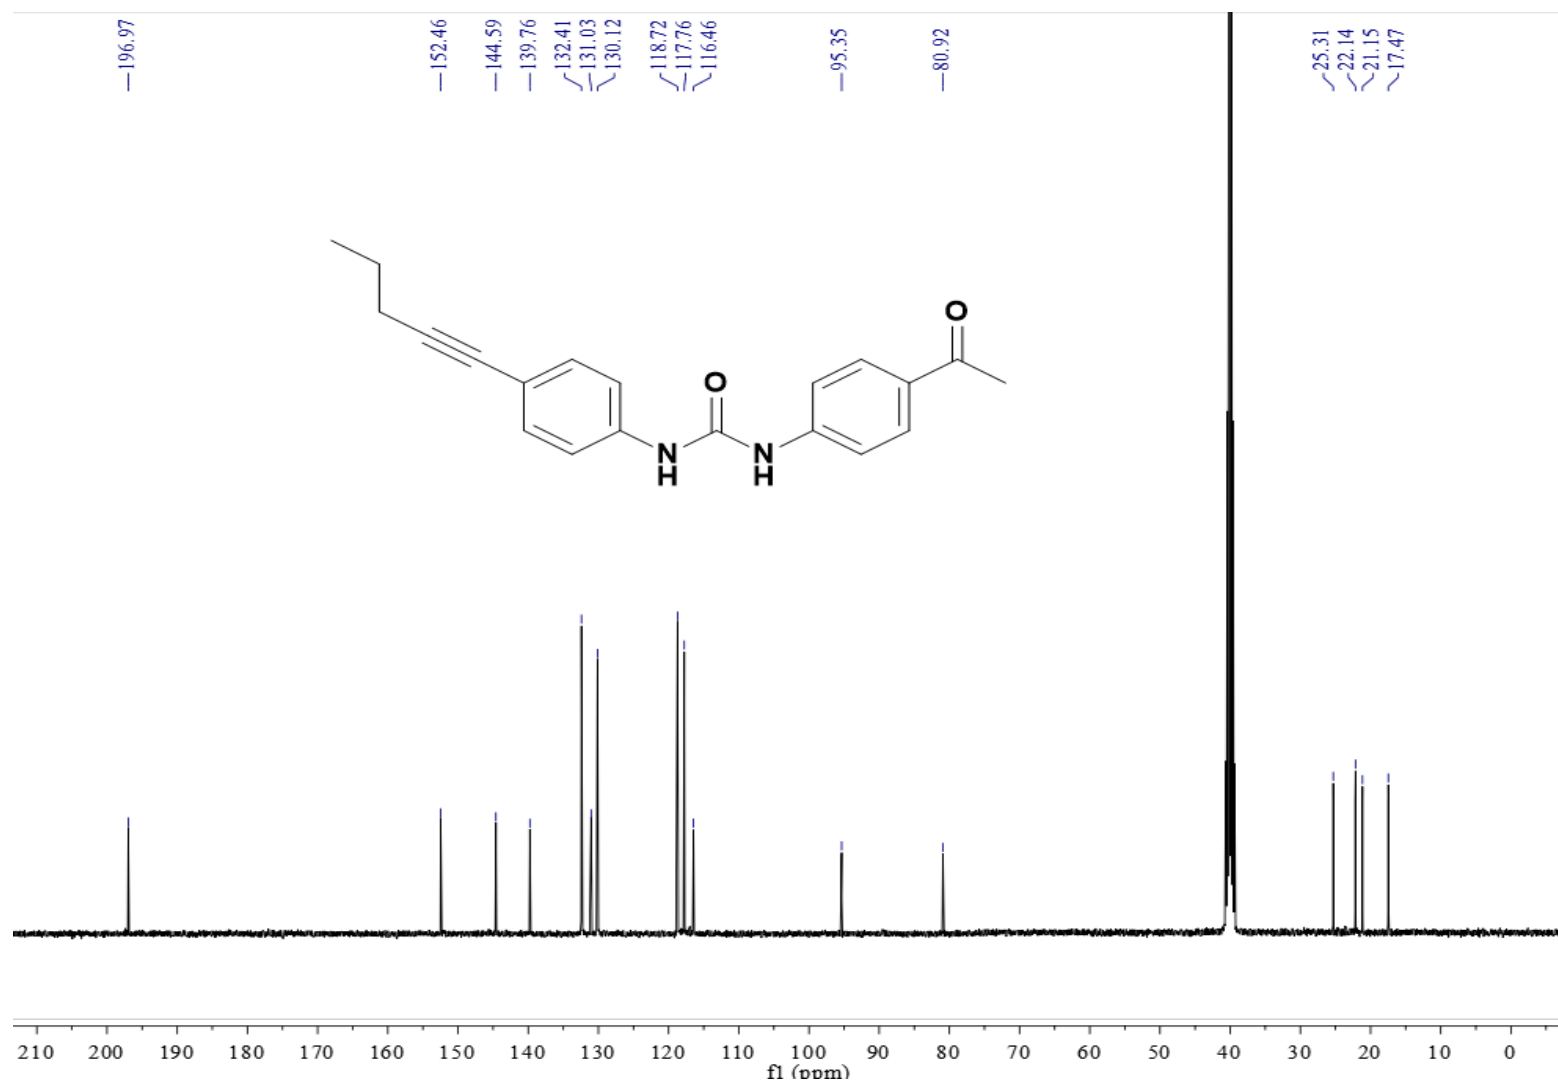

<sup>13</sup>C of compound (4a)

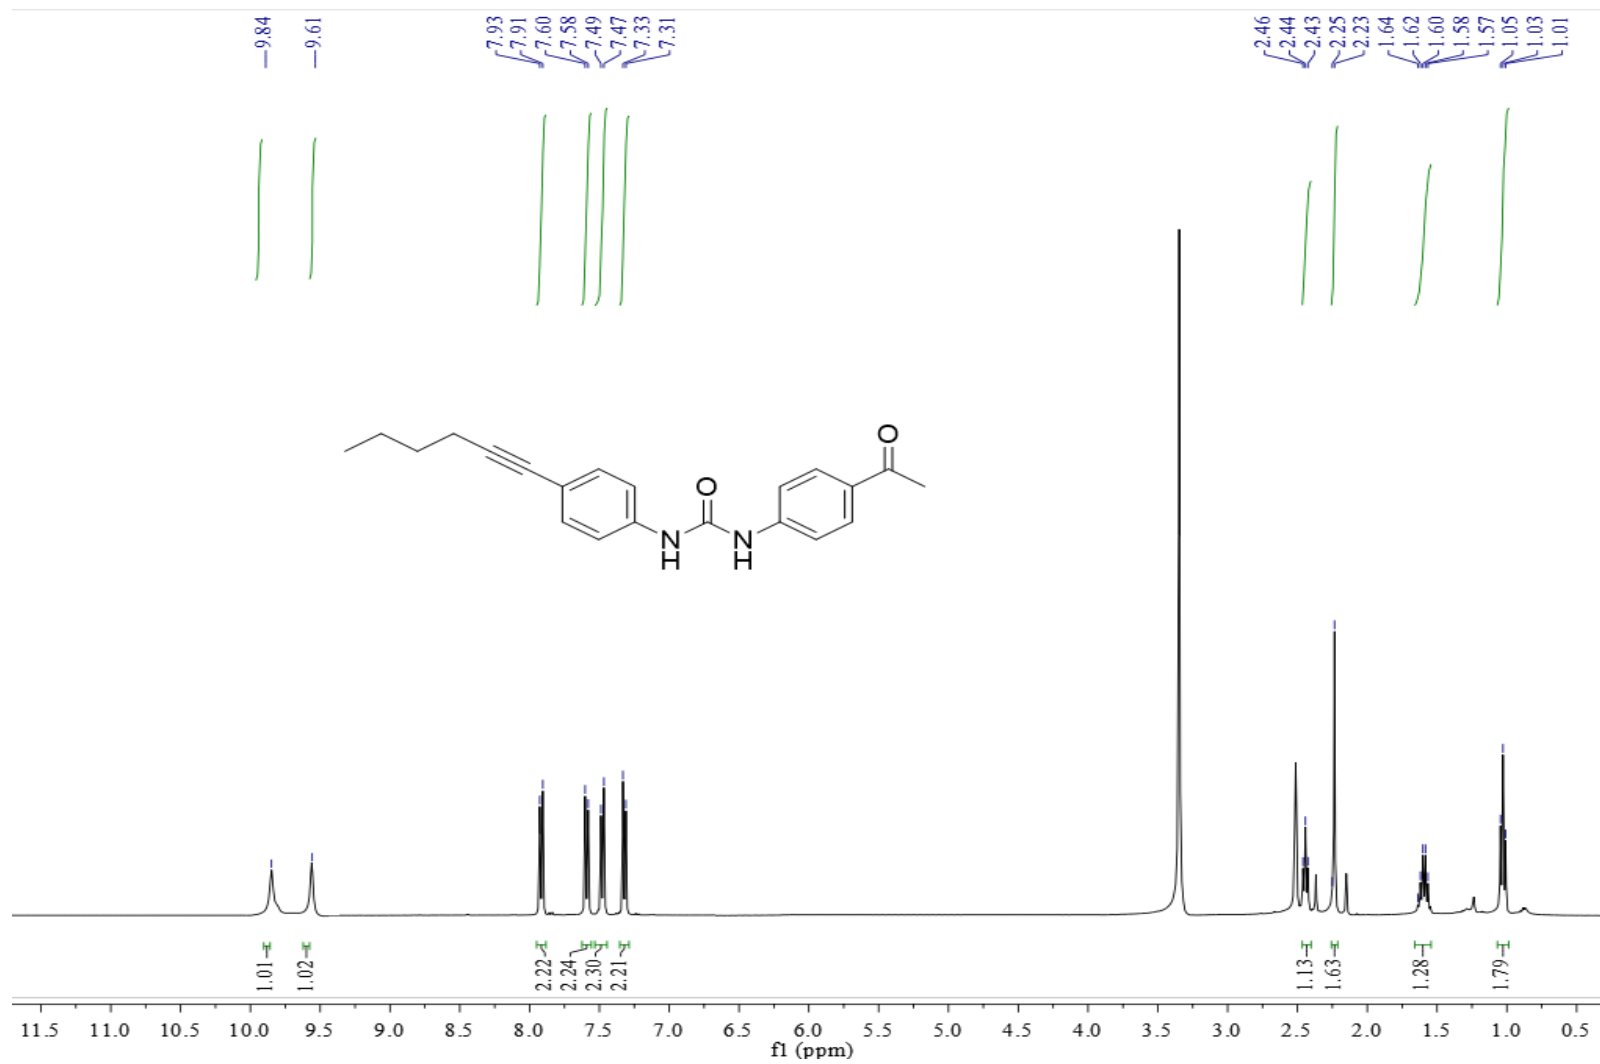

<sup>1</sup>H NMR of compound (4b)

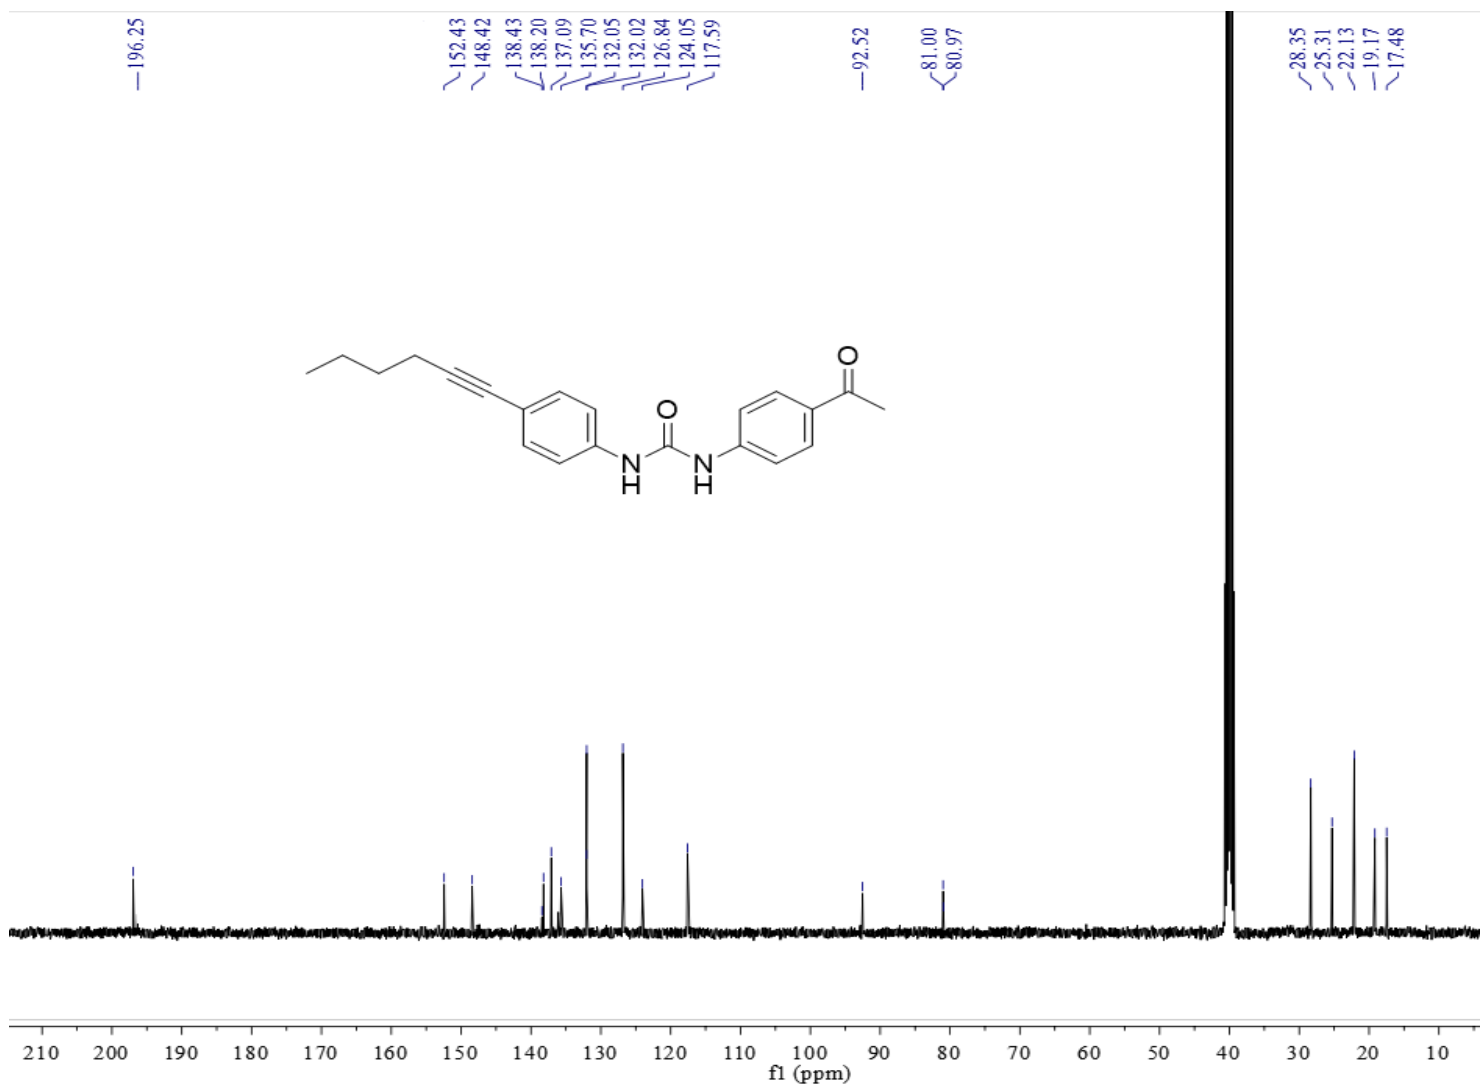

<sup>13</sup>C of compound (4b)

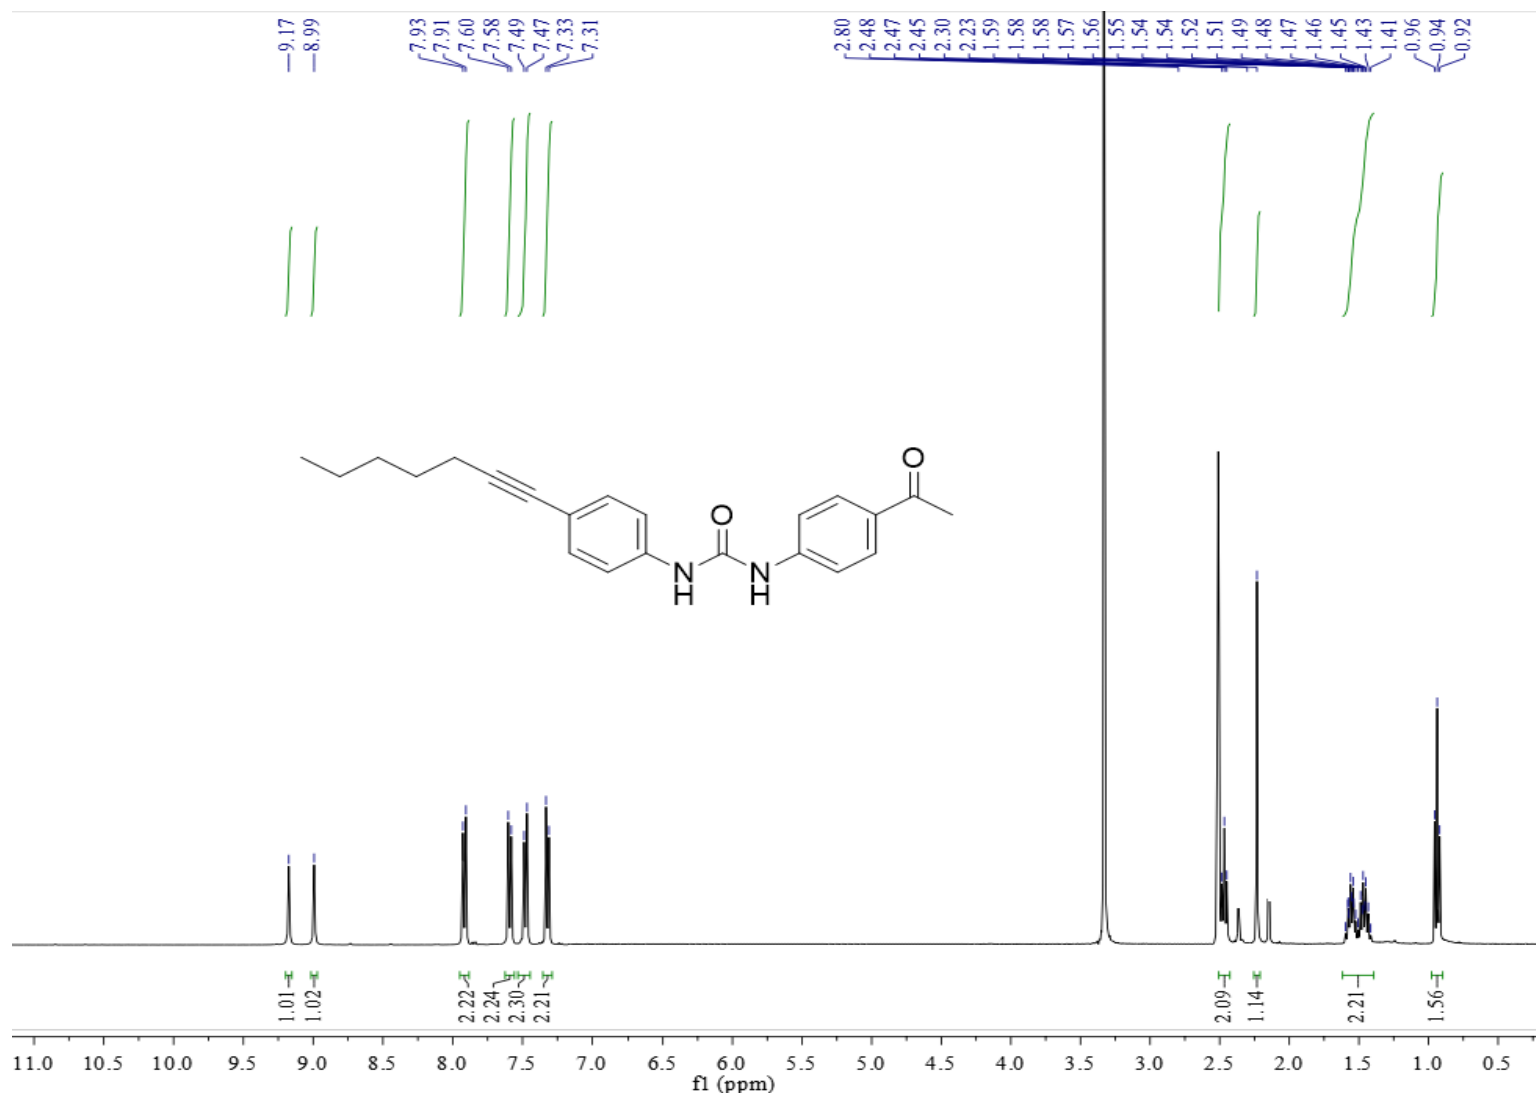

<sup>1</sup>H NMR of compound (4c)

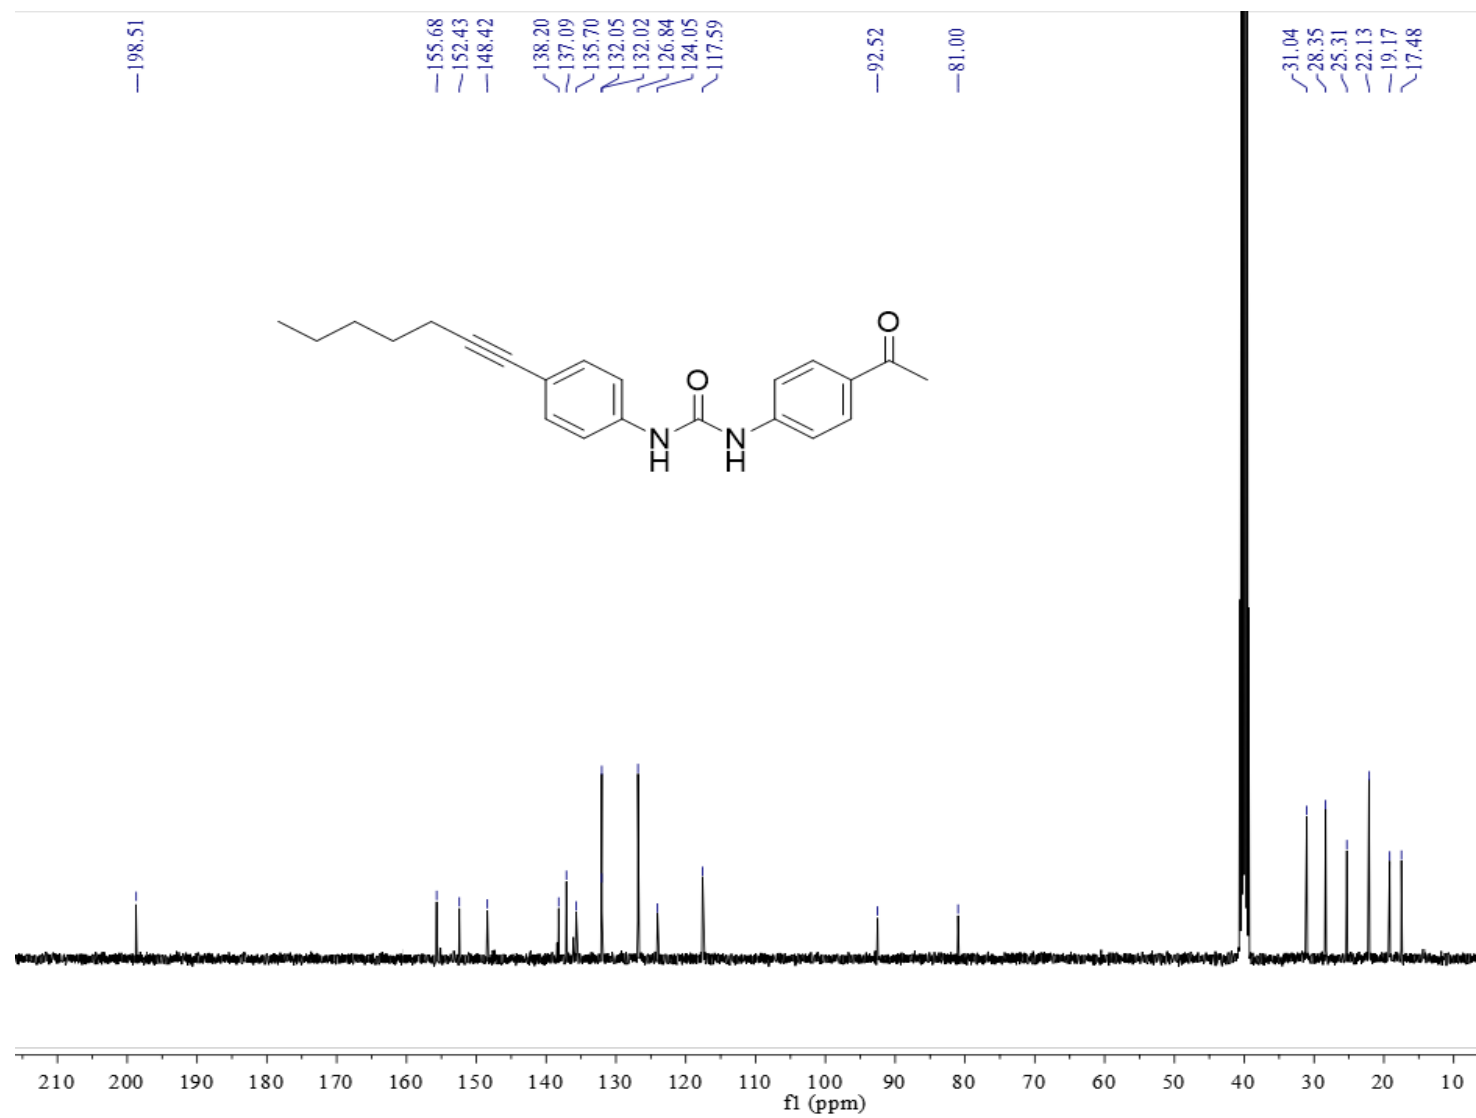

<sup>13</sup>C of compound (4c)

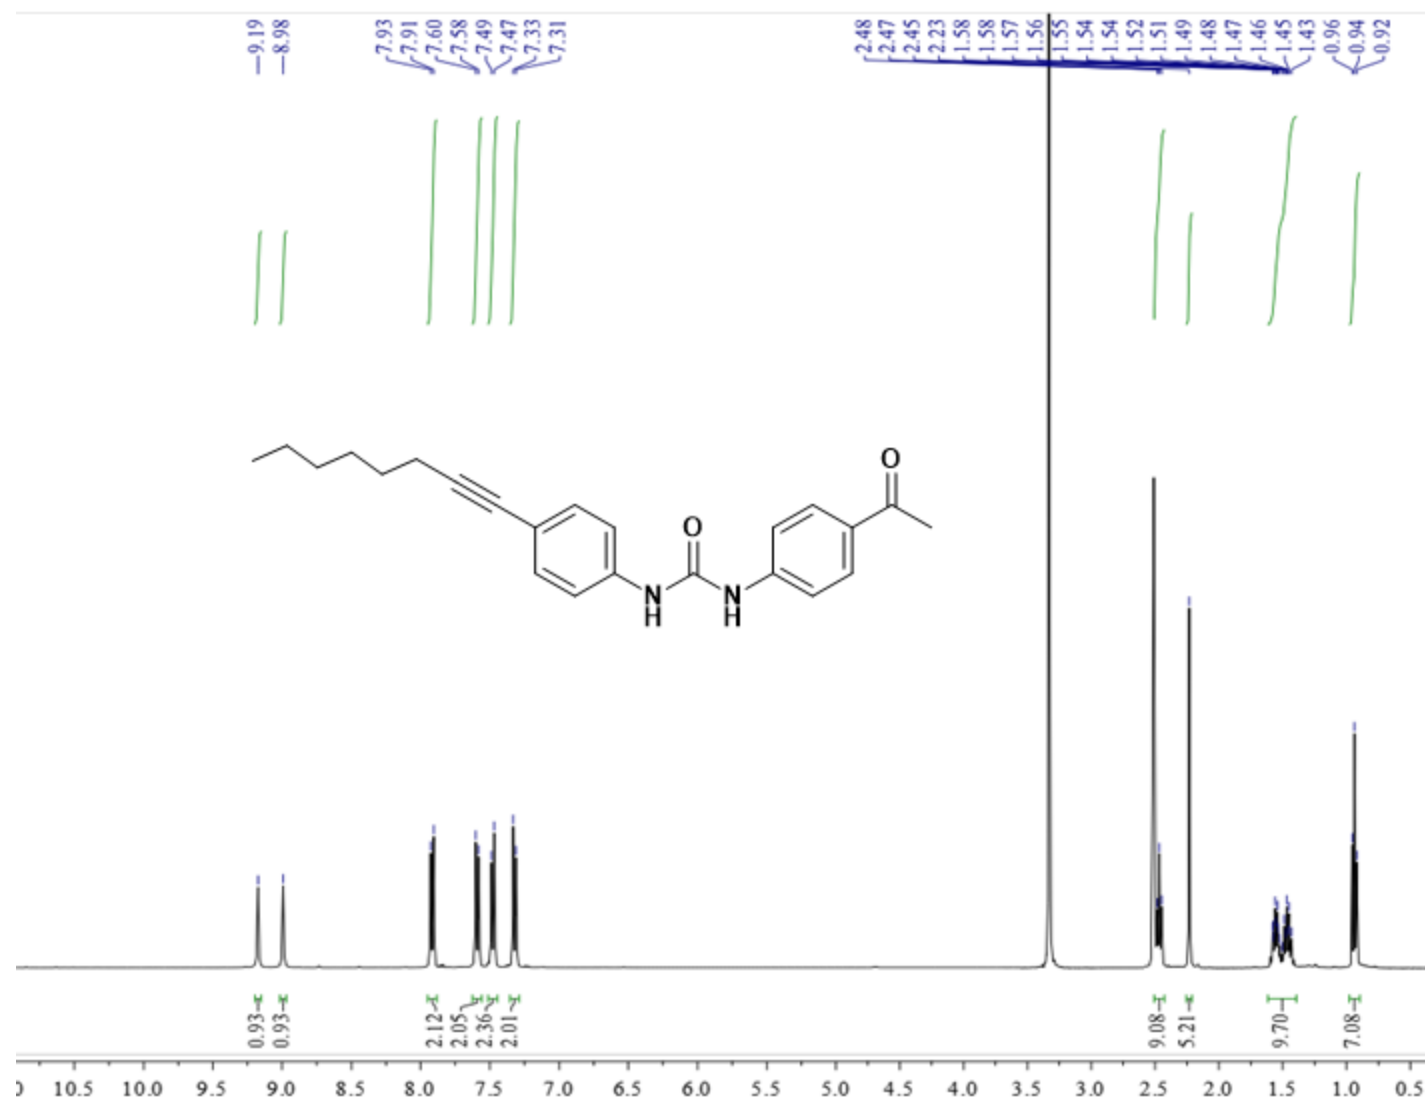

<sup>1</sup>H NMR of compound (4d)



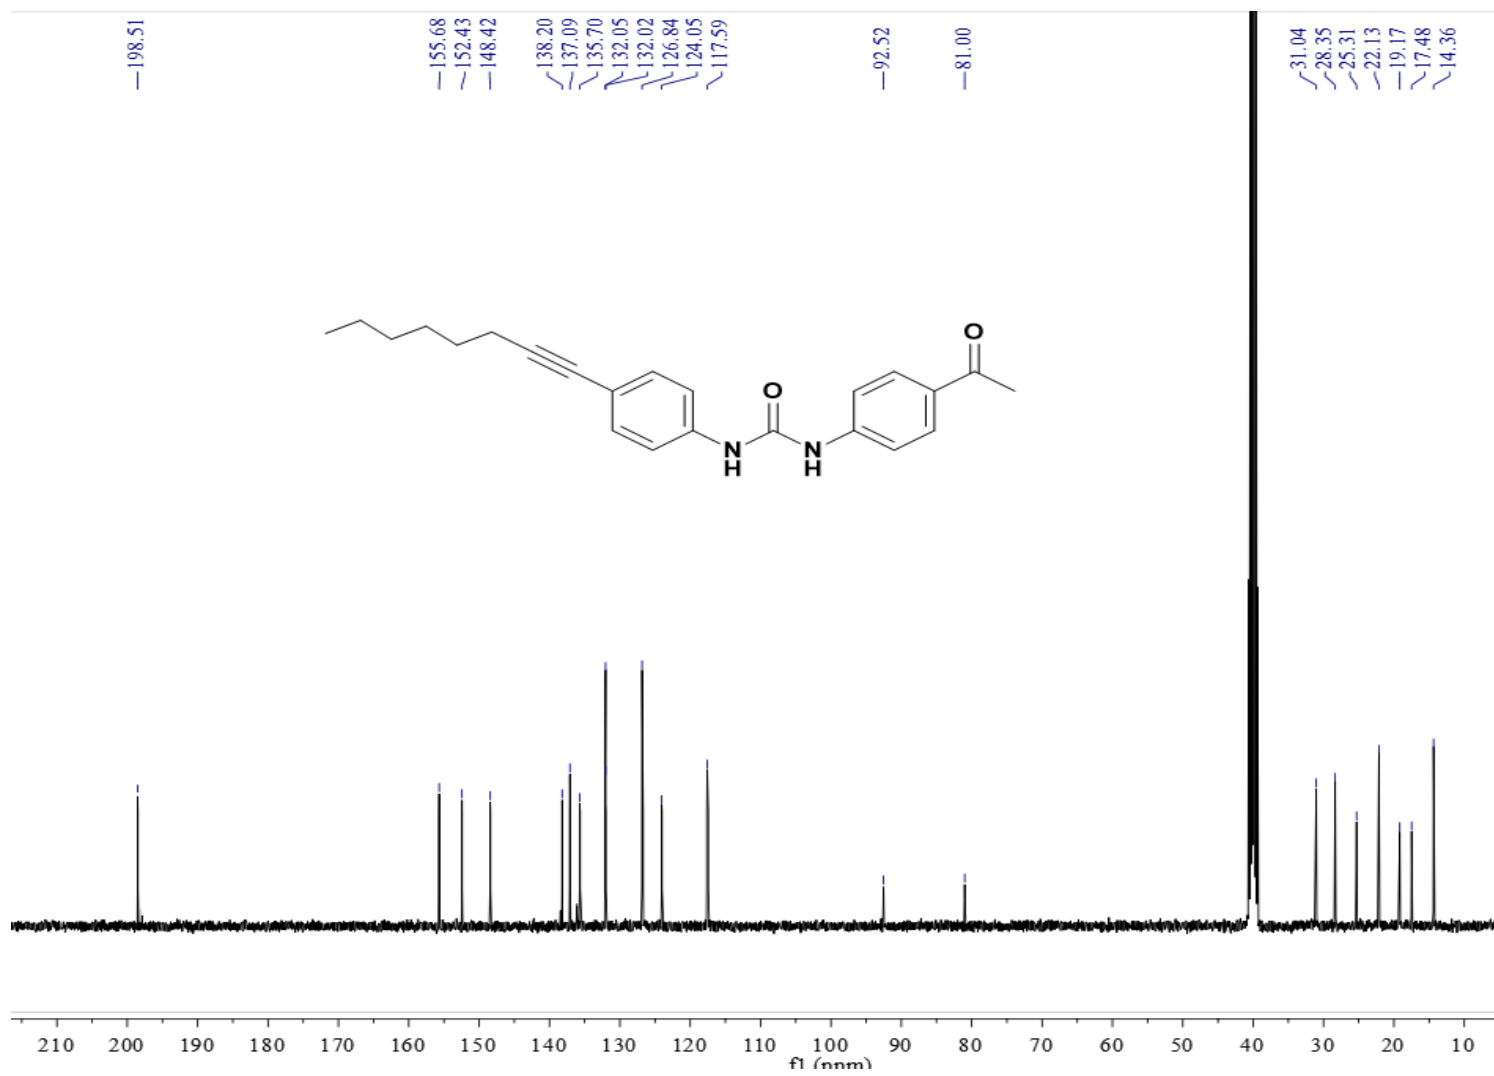

<sup>13</sup>C of compound (4d)

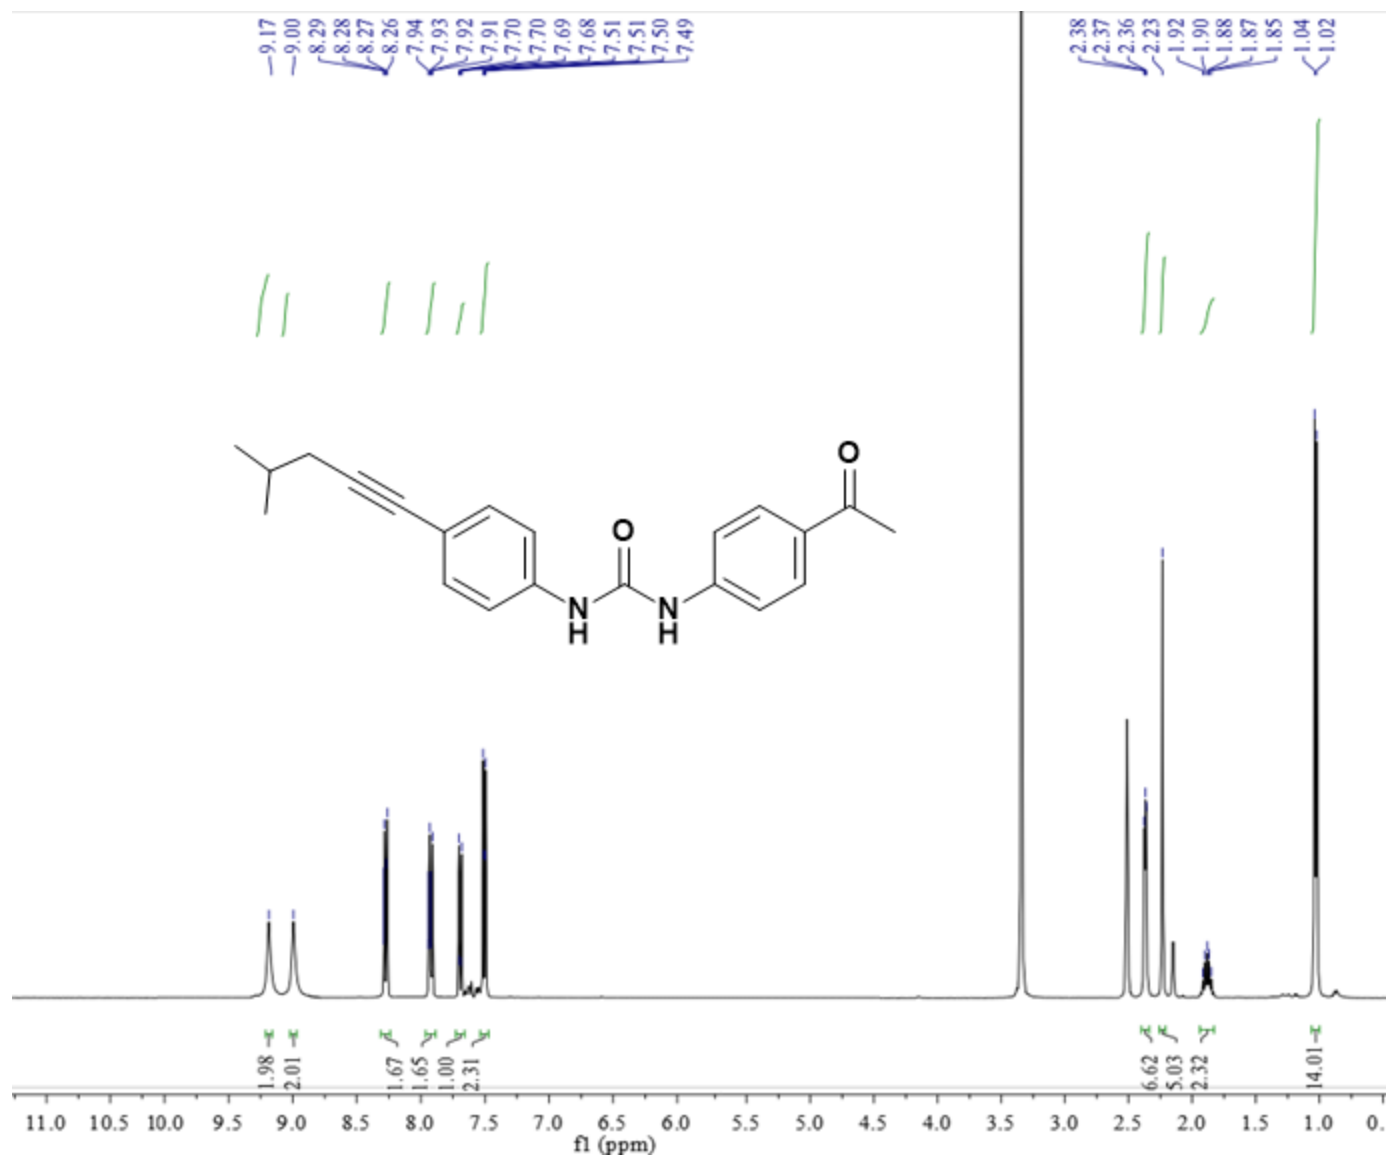

<sup>1</sup>H NMR of compound (4e)

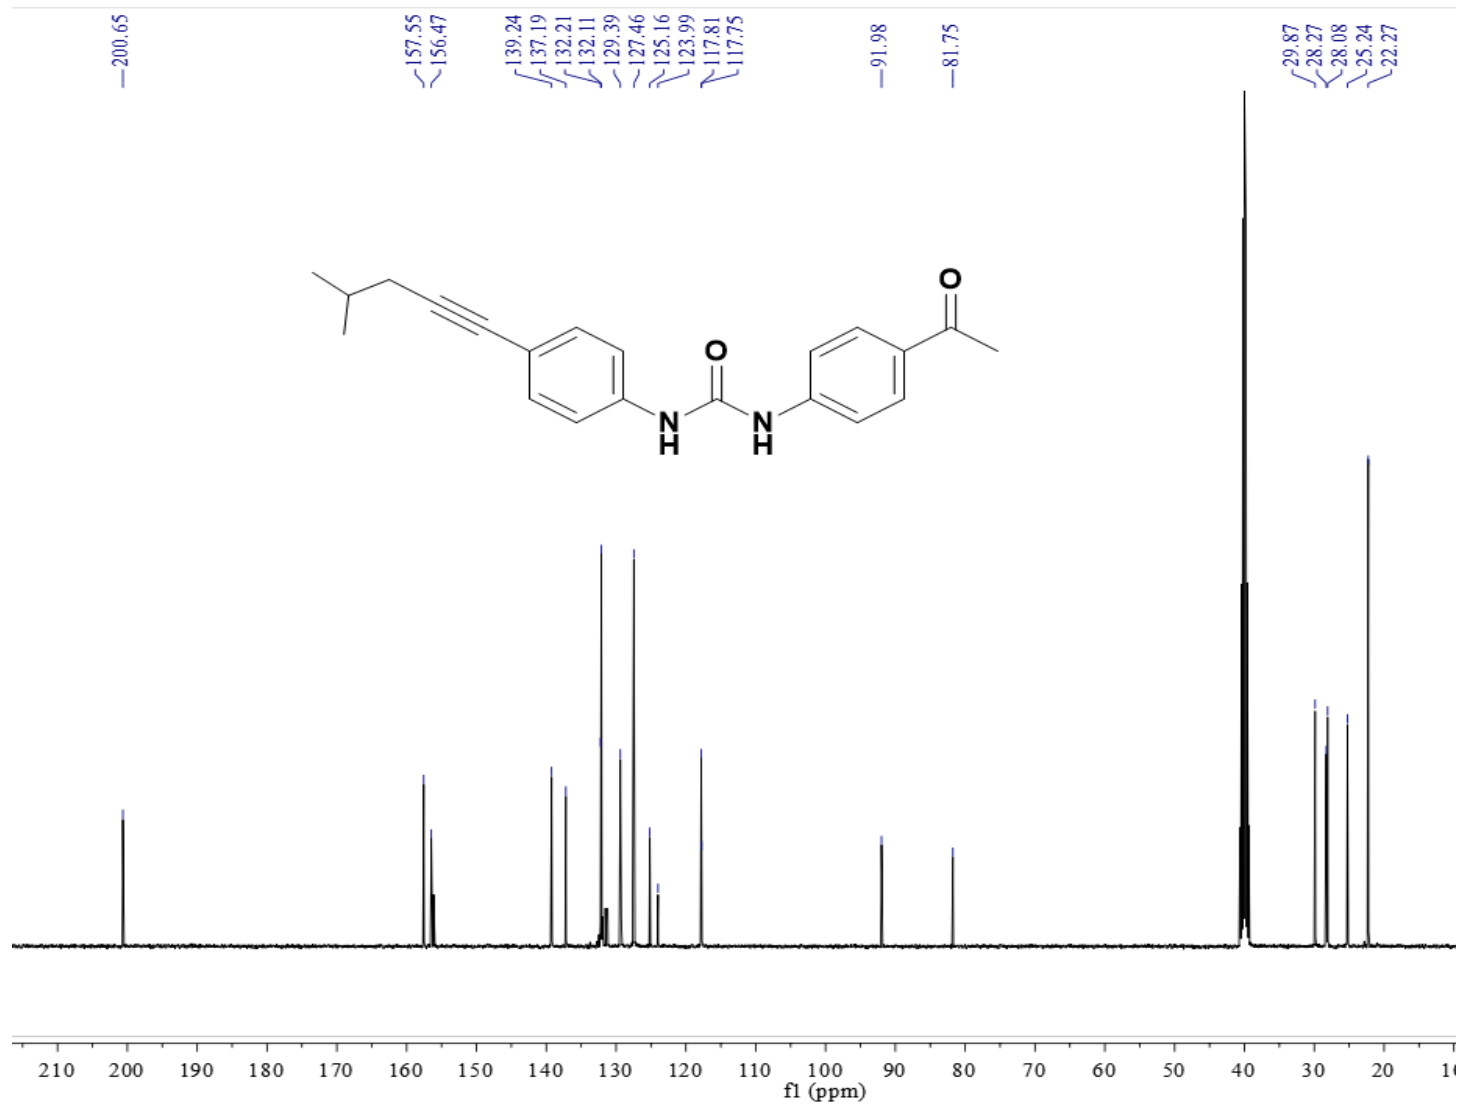

<sup>13</sup>C of compound (4e)

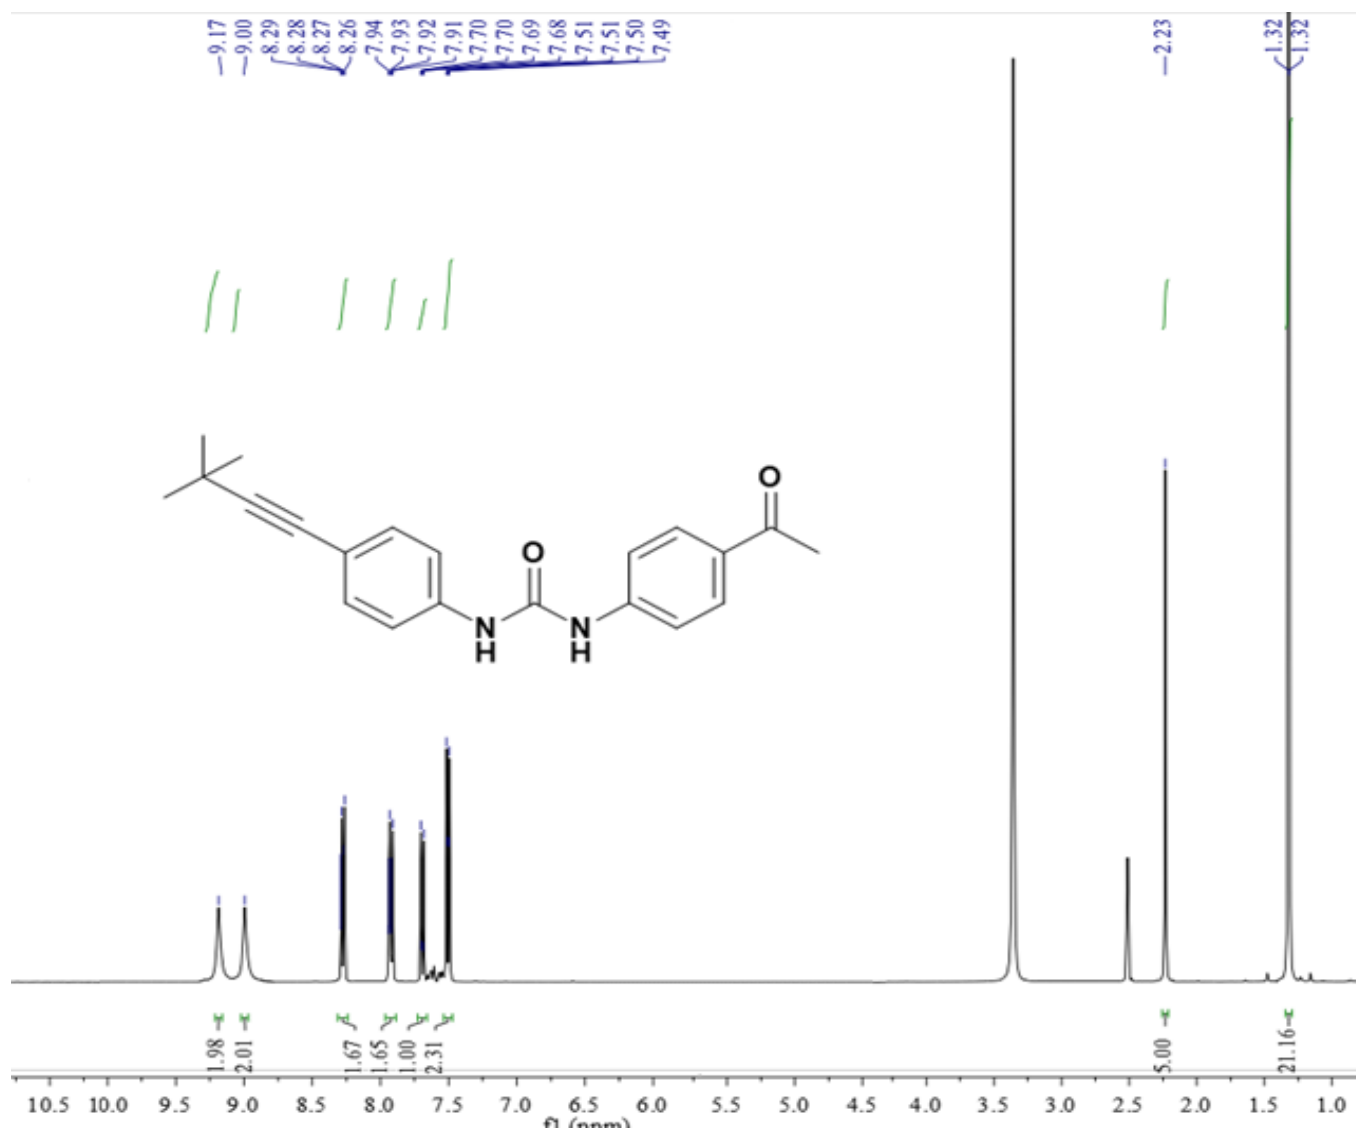

<sup>1</sup>H NMR of compound (4f)

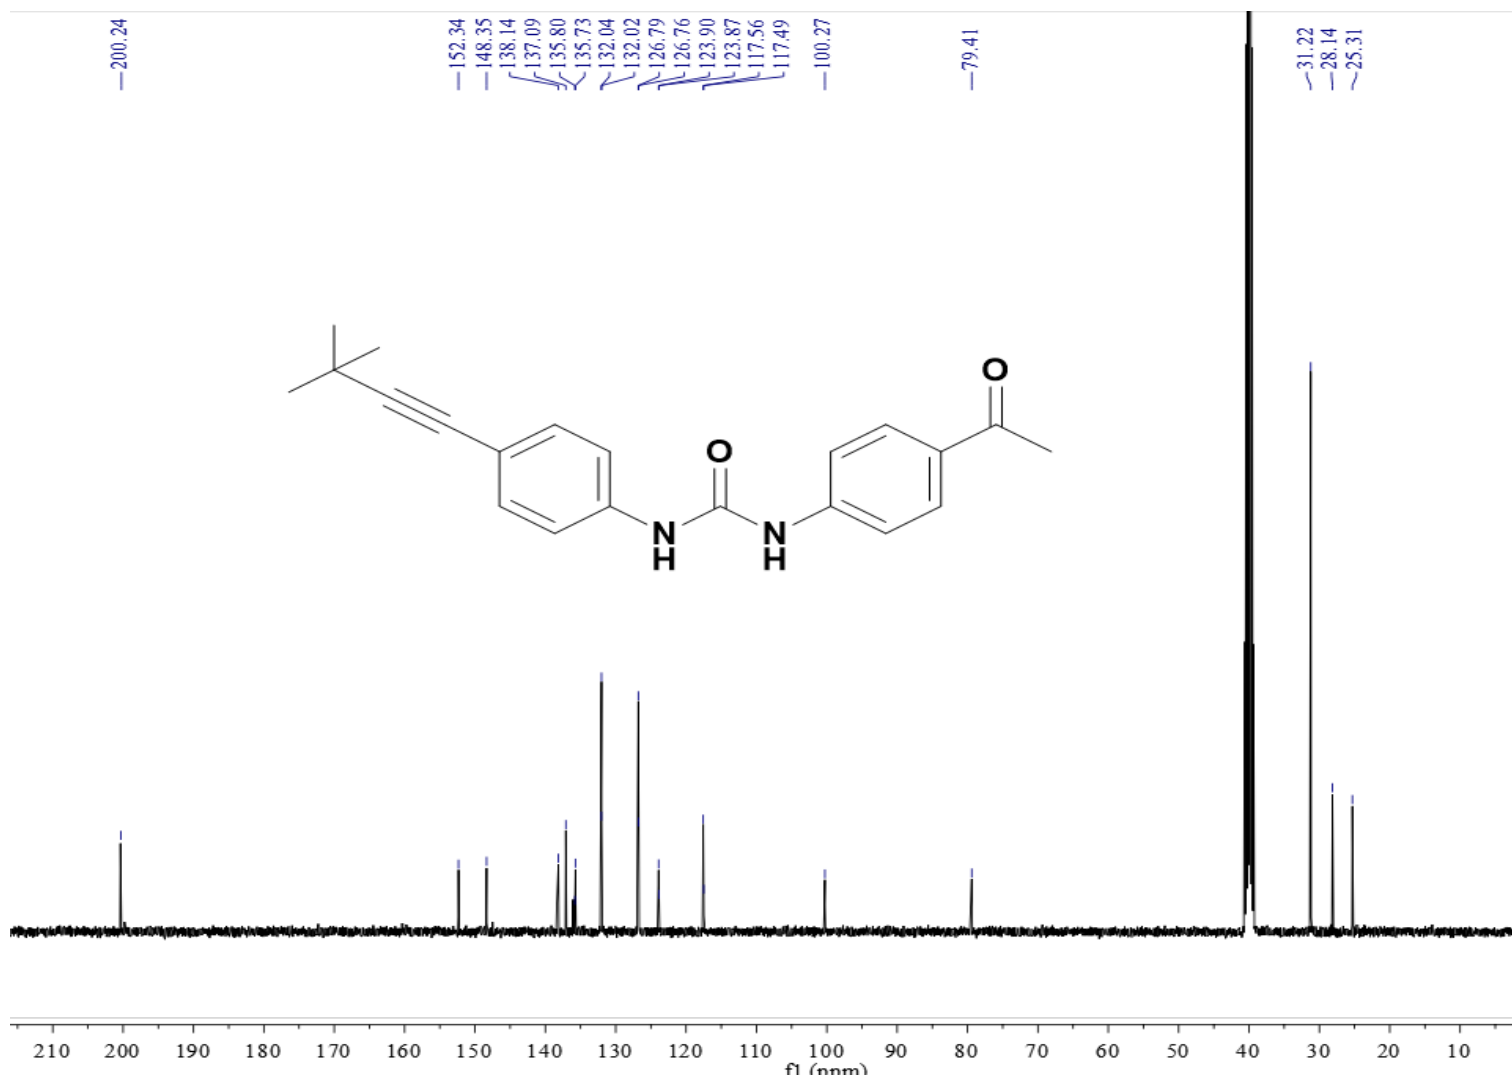

<sup>13</sup>C of compound (4f)

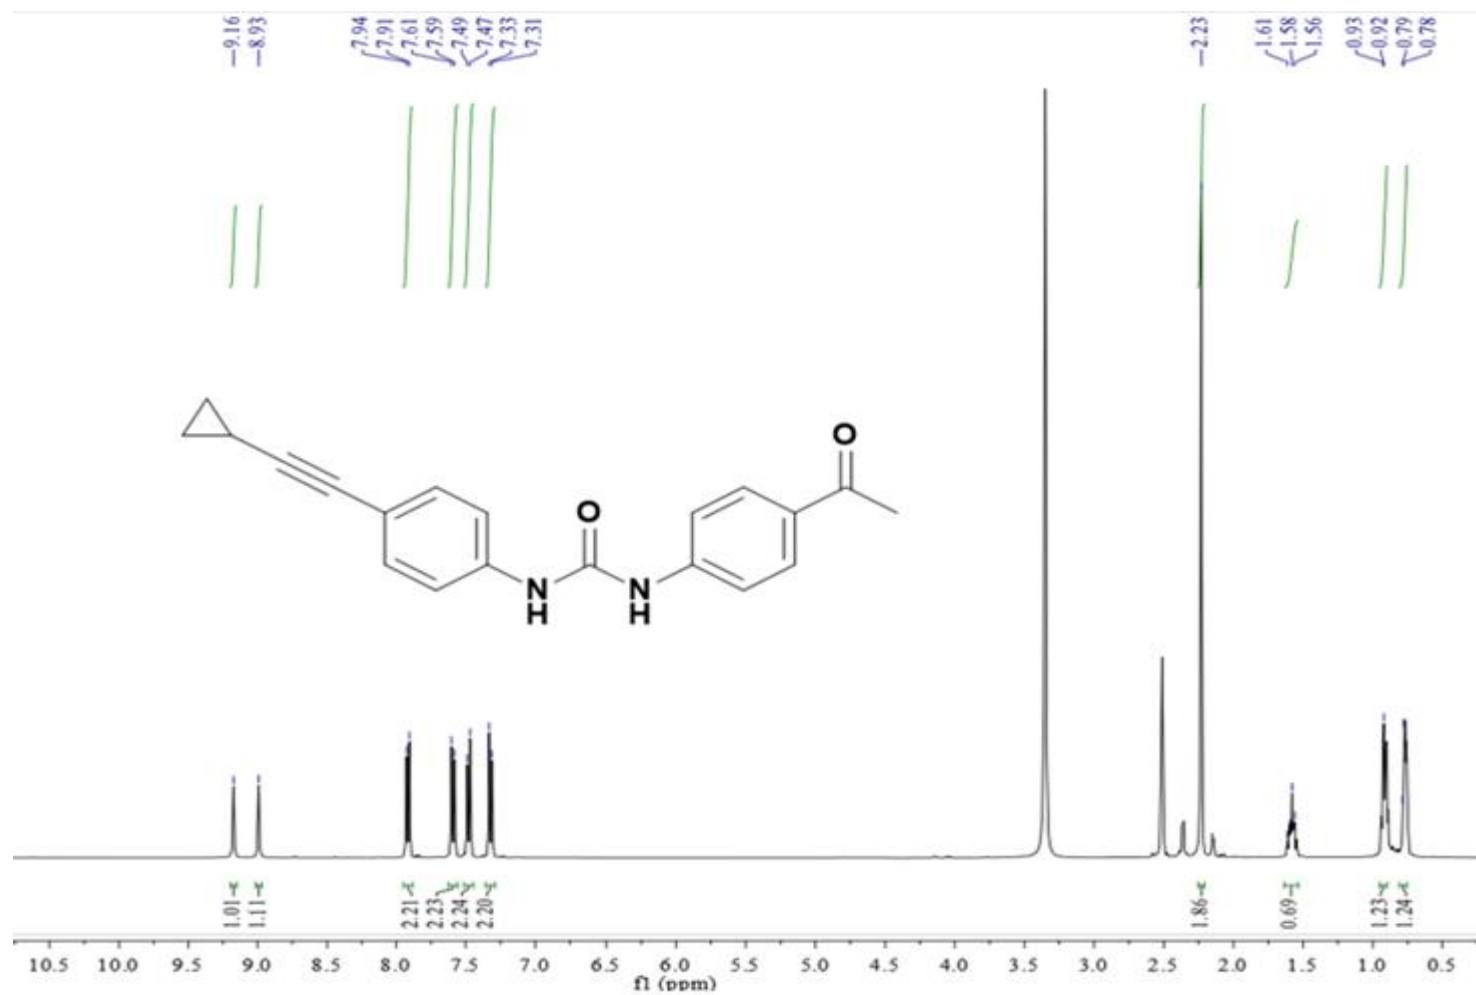

<sup>1</sup>H NMR of compound (4g)

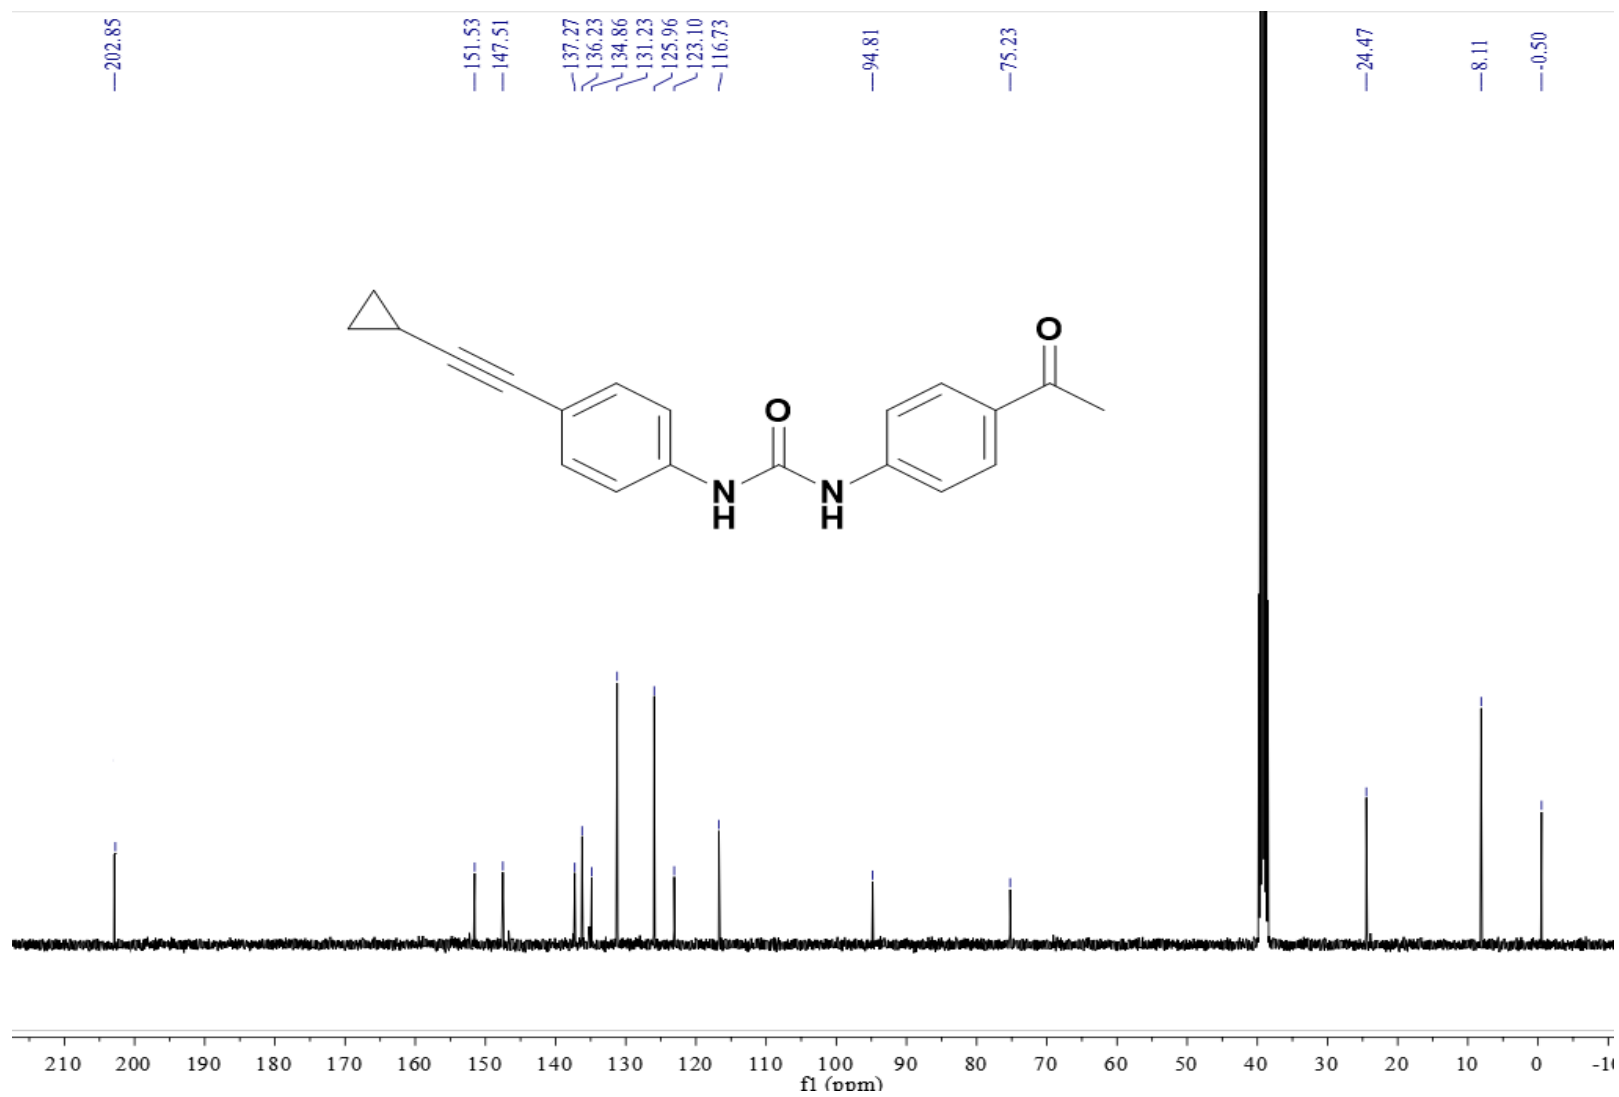

<sup>13</sup>C of compound (4g)

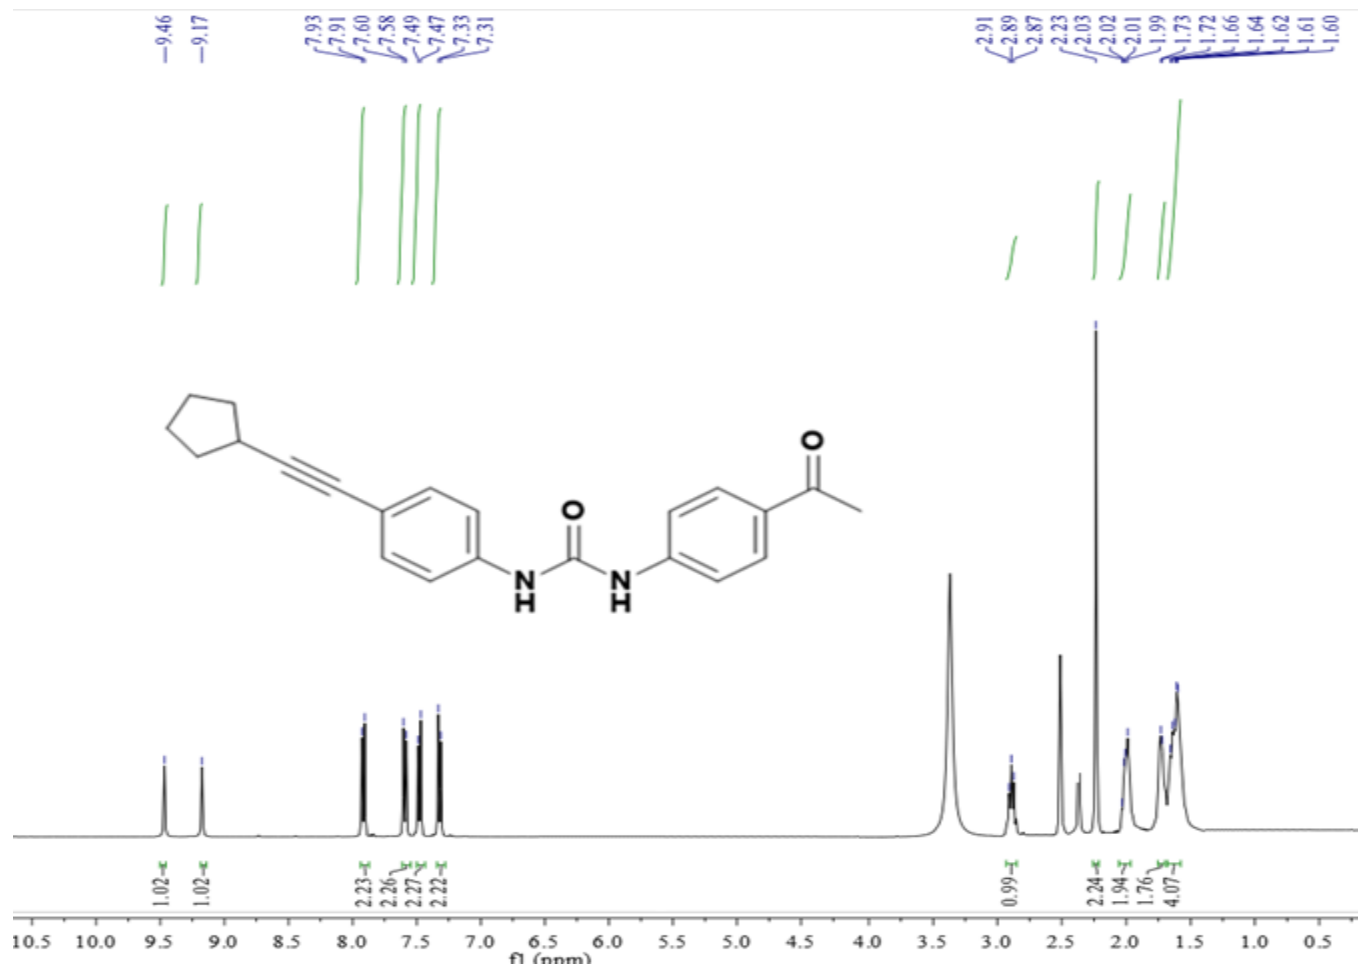

<sup>1</sup>H NMR of compound (4h)



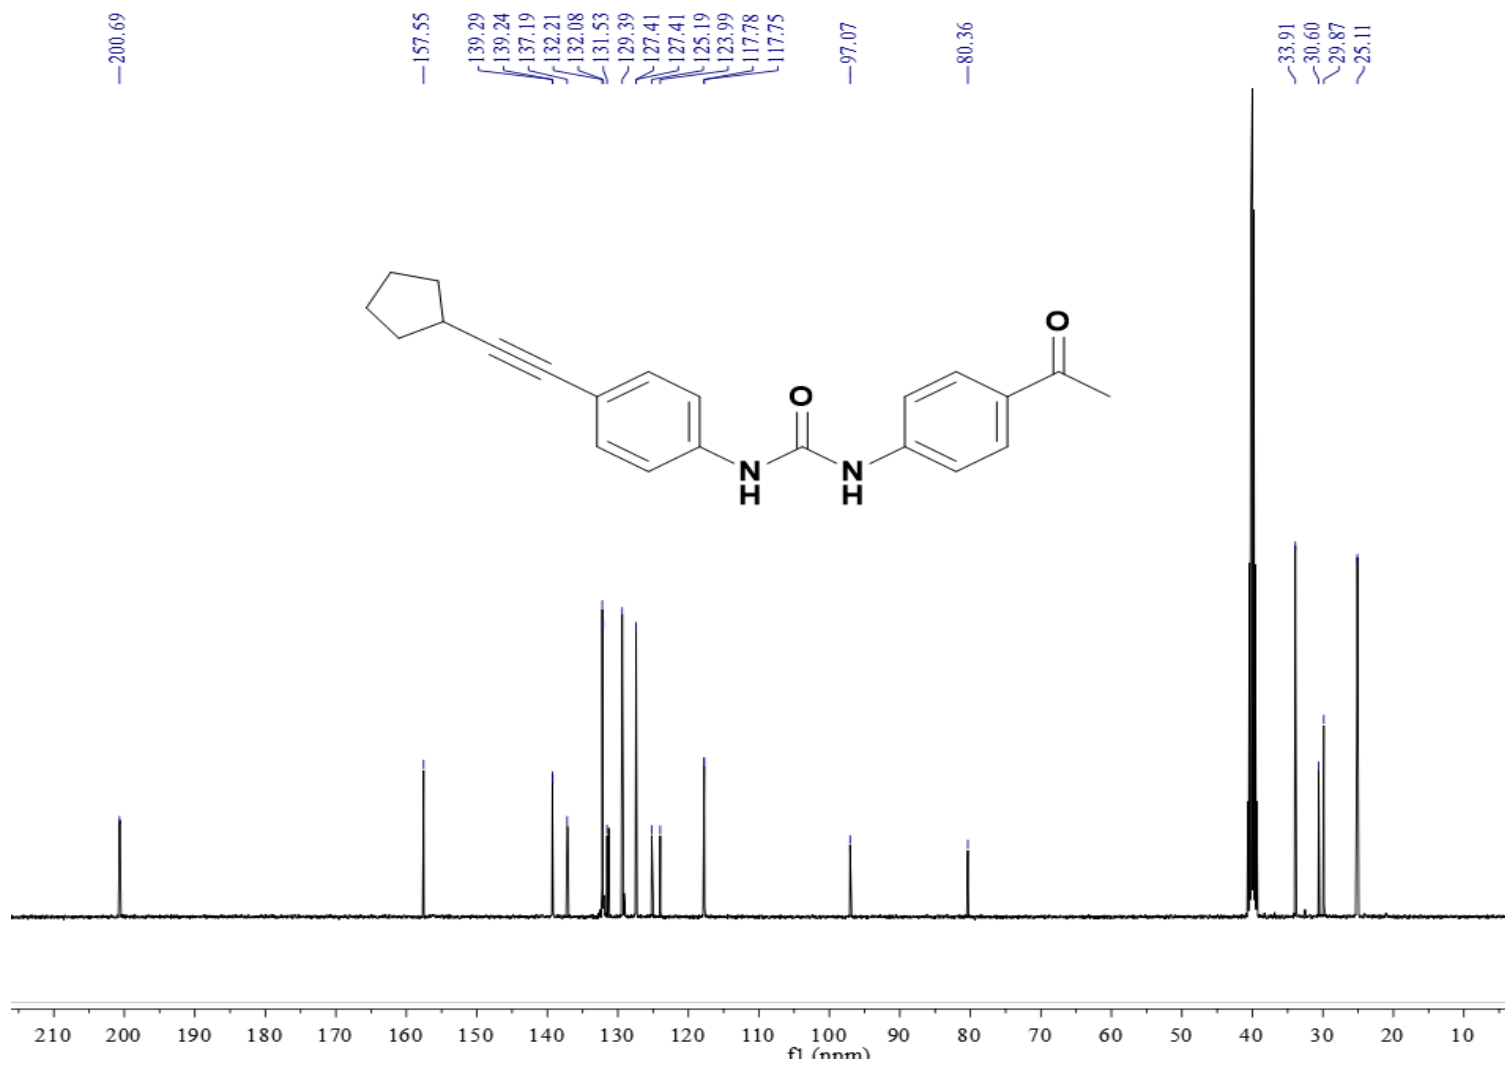

<sup>13</sup>C of compound (4h)

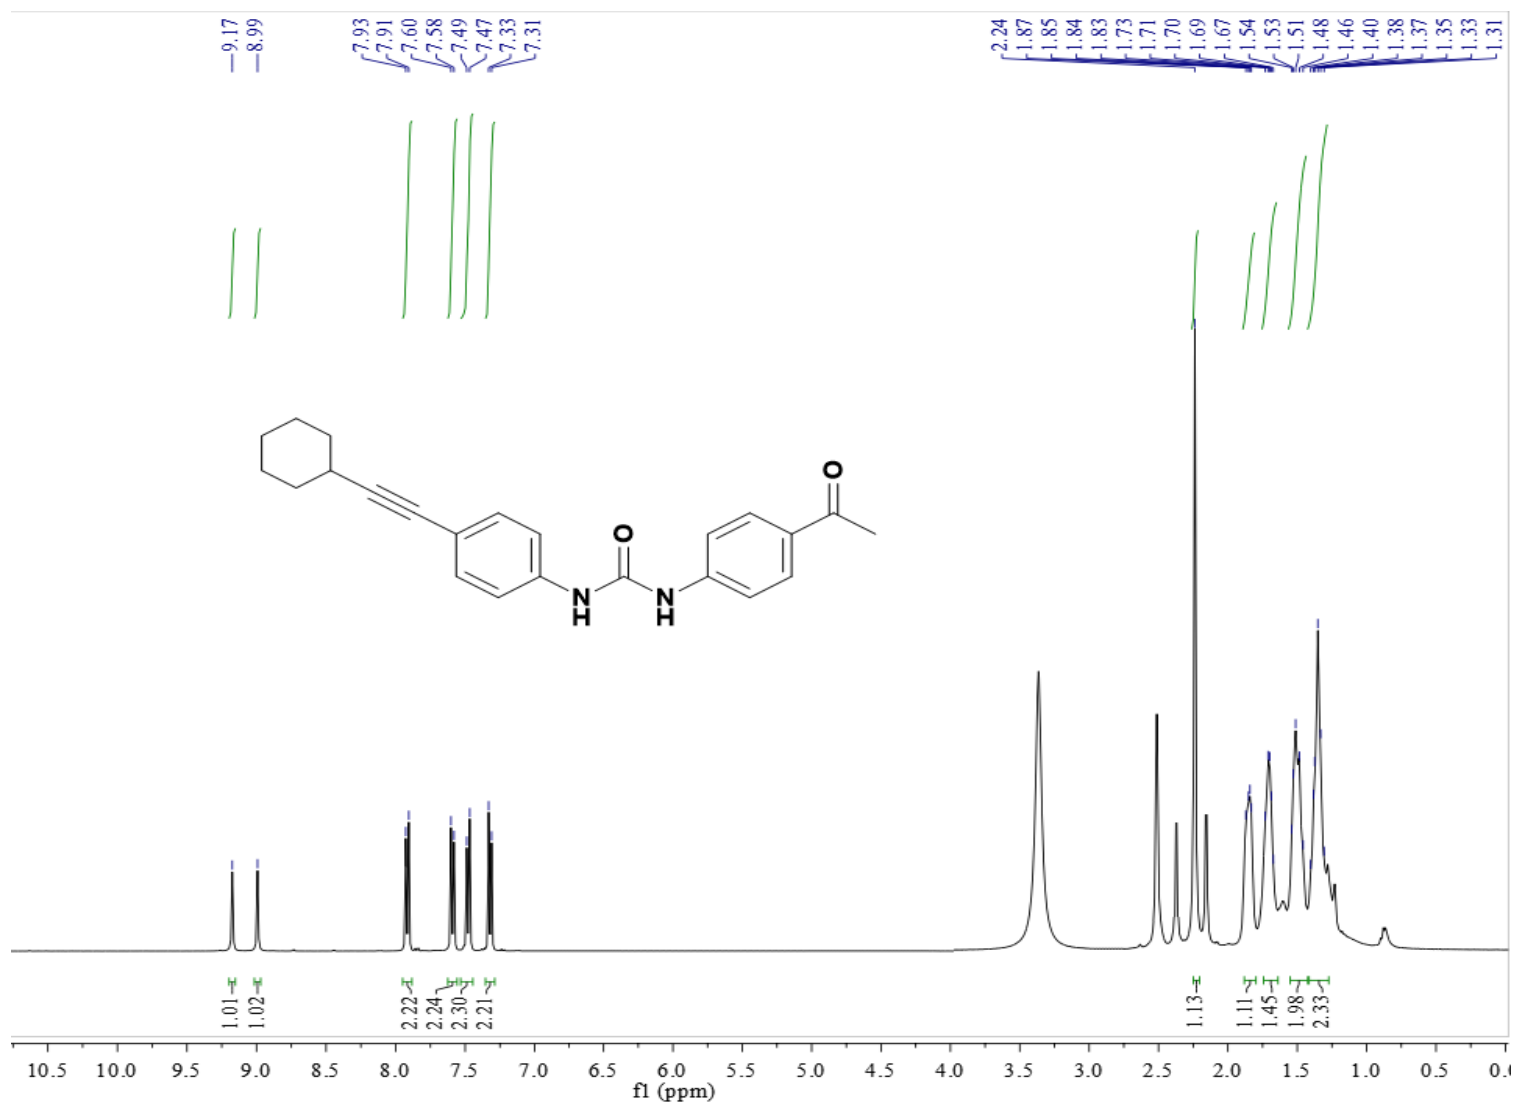

<sup>1</sup>H NMR of compound (4i)

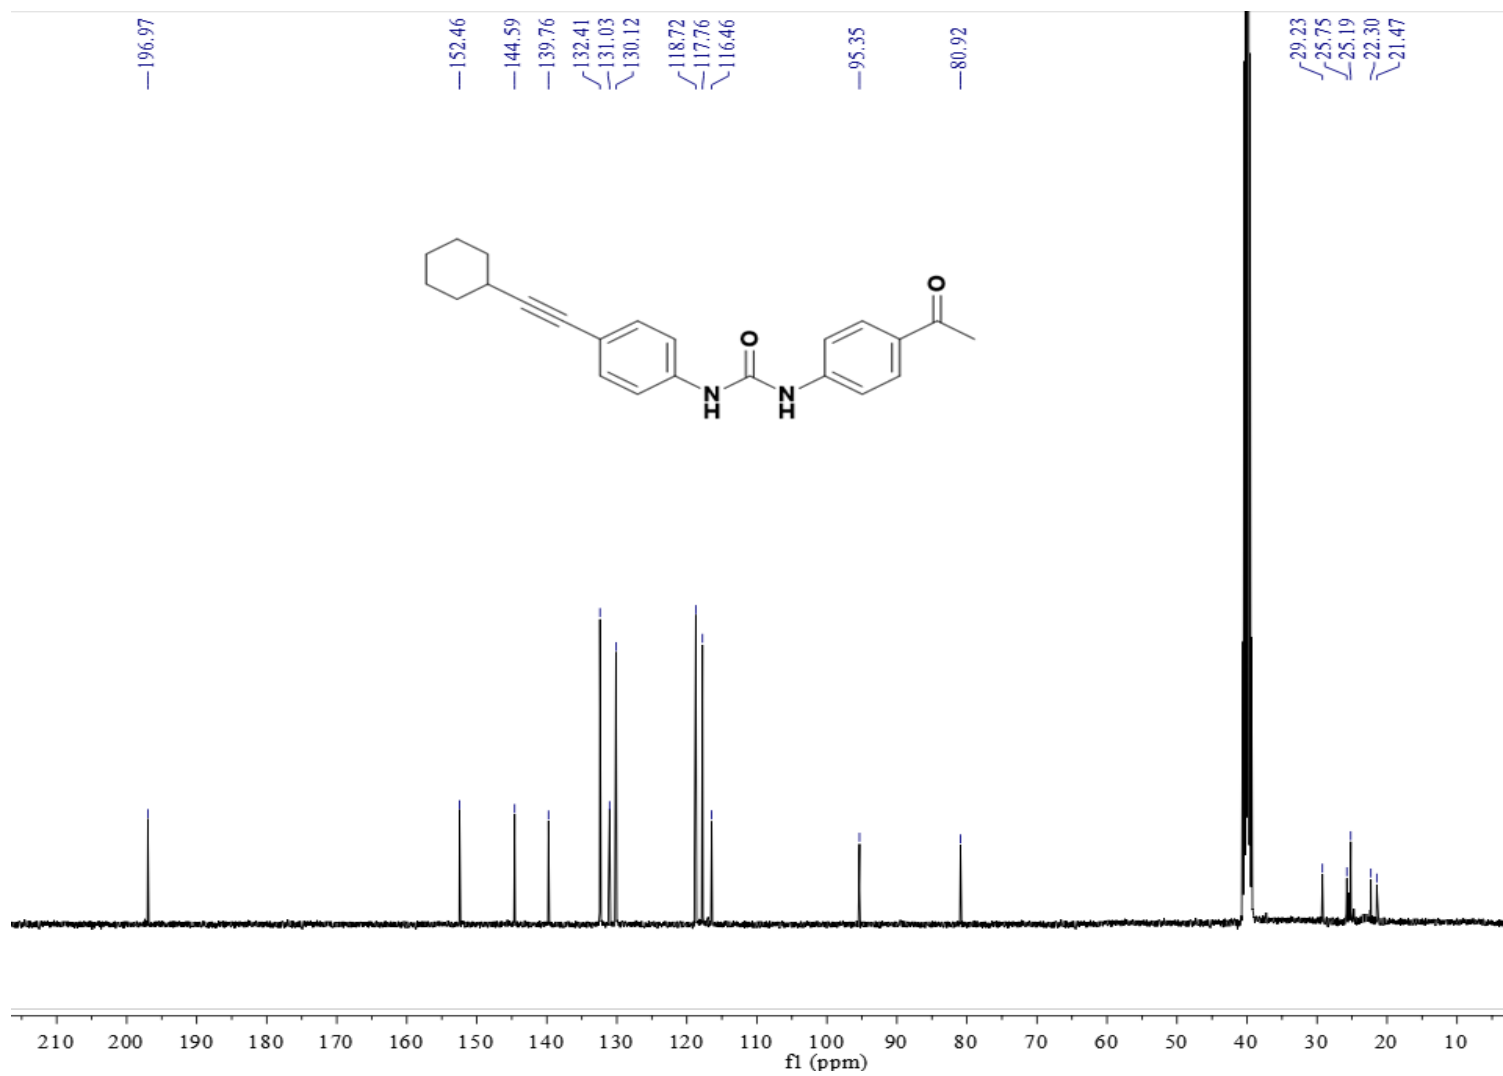

<sup>13</sup>C of compound (4i)

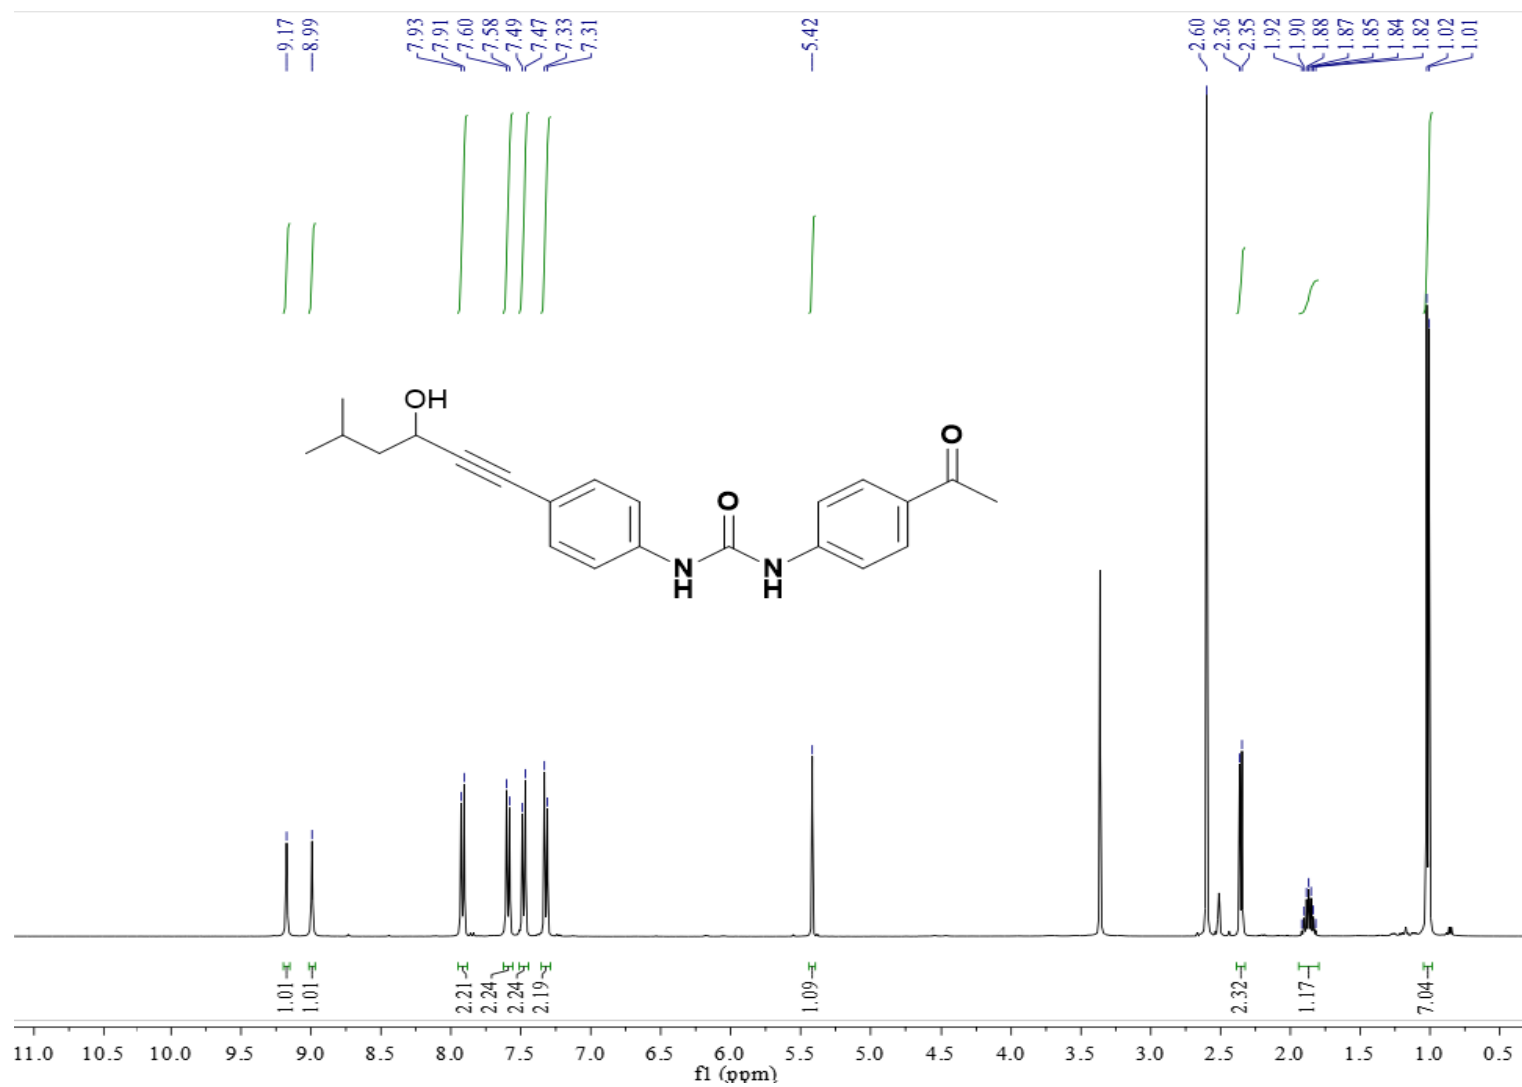

**<sup>1</sup>H NMR of compound (4j)**

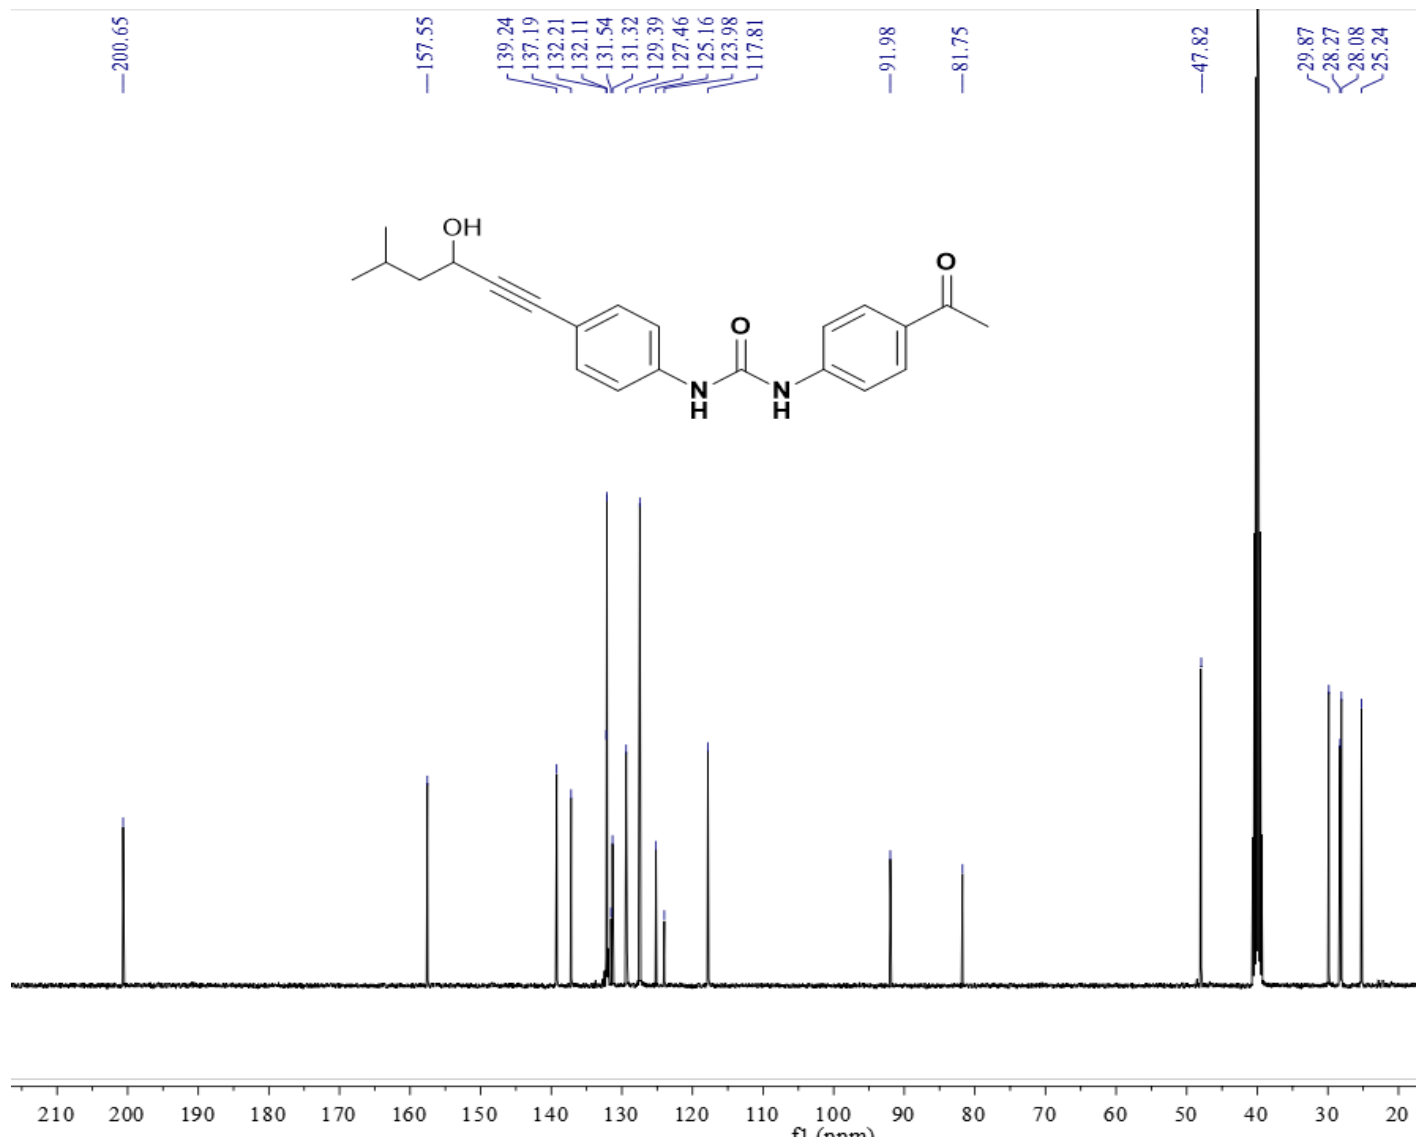

<sup>13</sup>C of compound (4j)

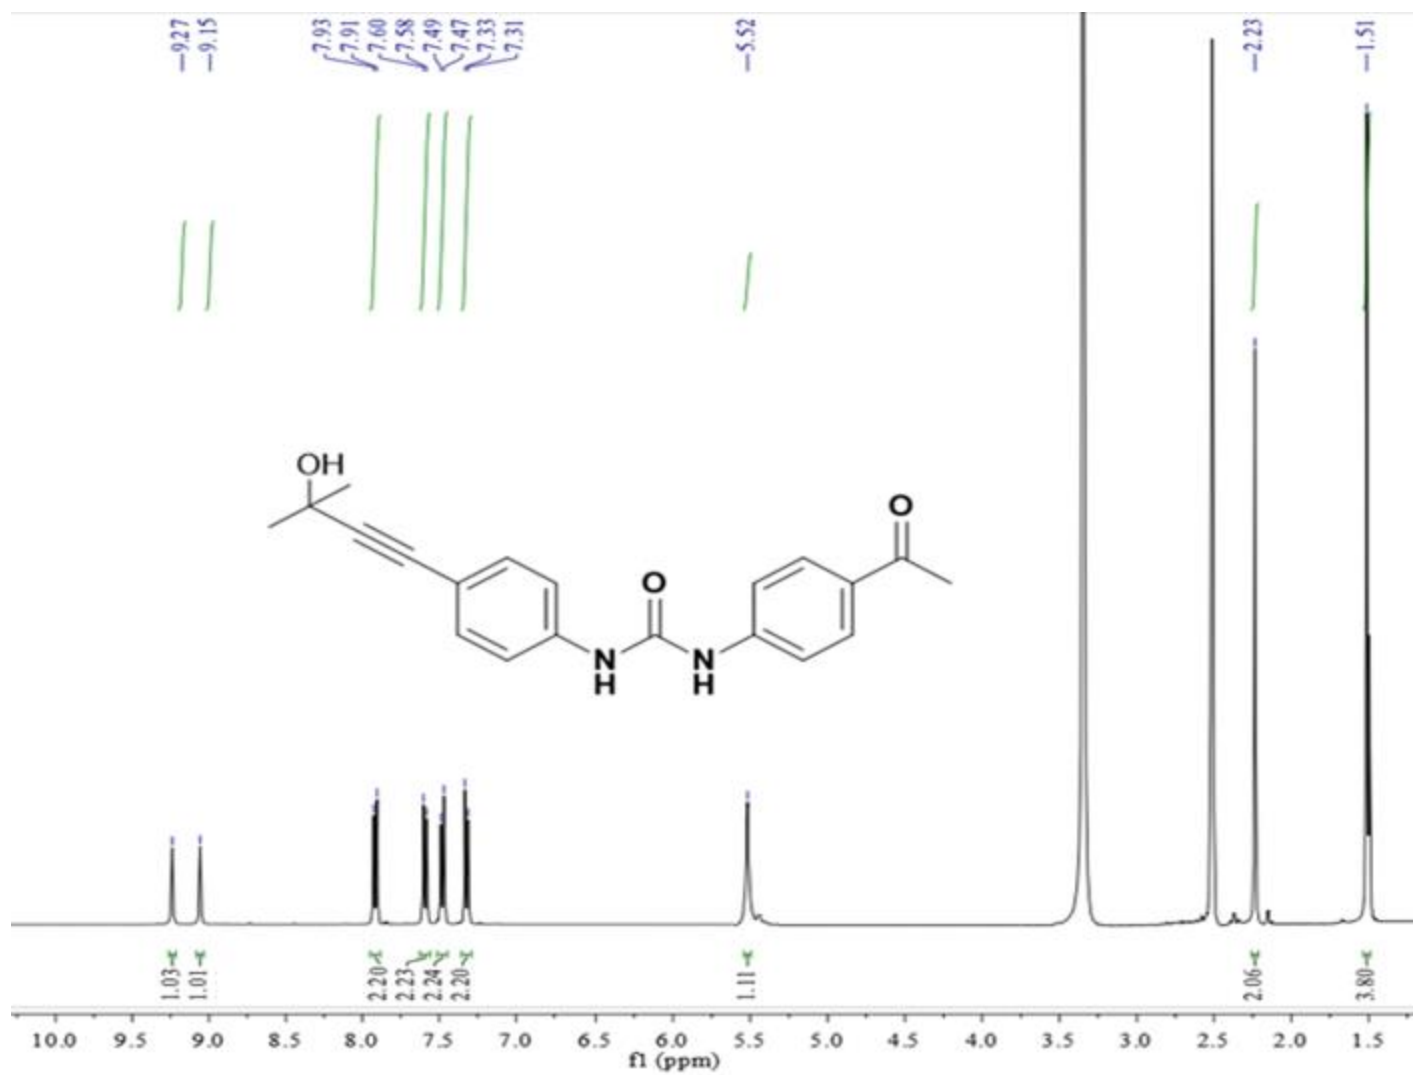

<sup>1</sup>H NMR of compound (4k)

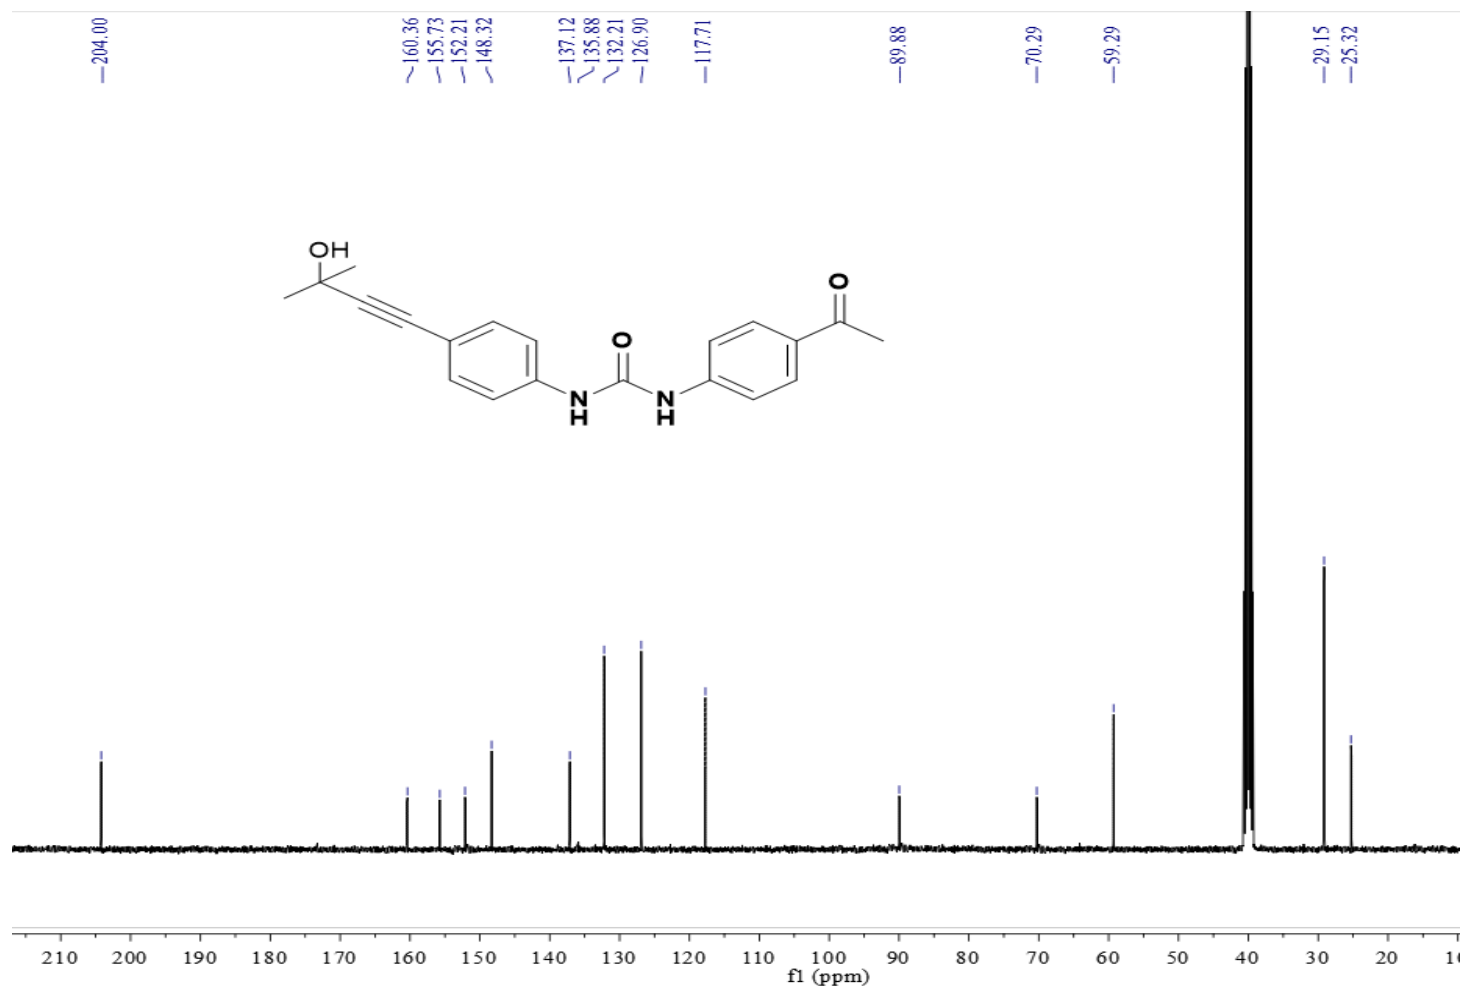

<sup>13</sup>C of compound (4k)

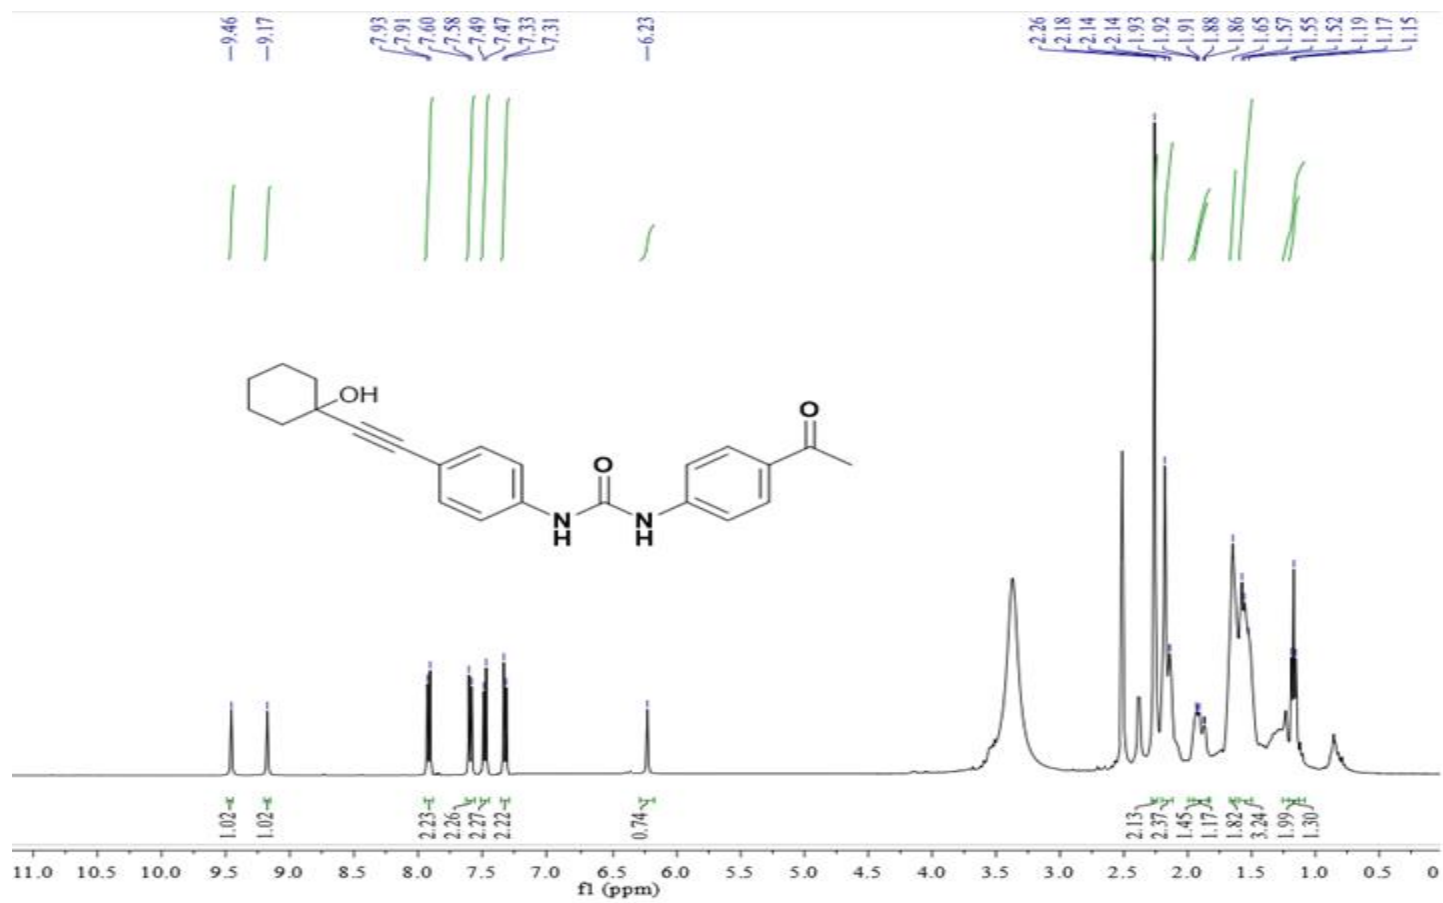

<sup>1</sup>H NMR of compound (4l)



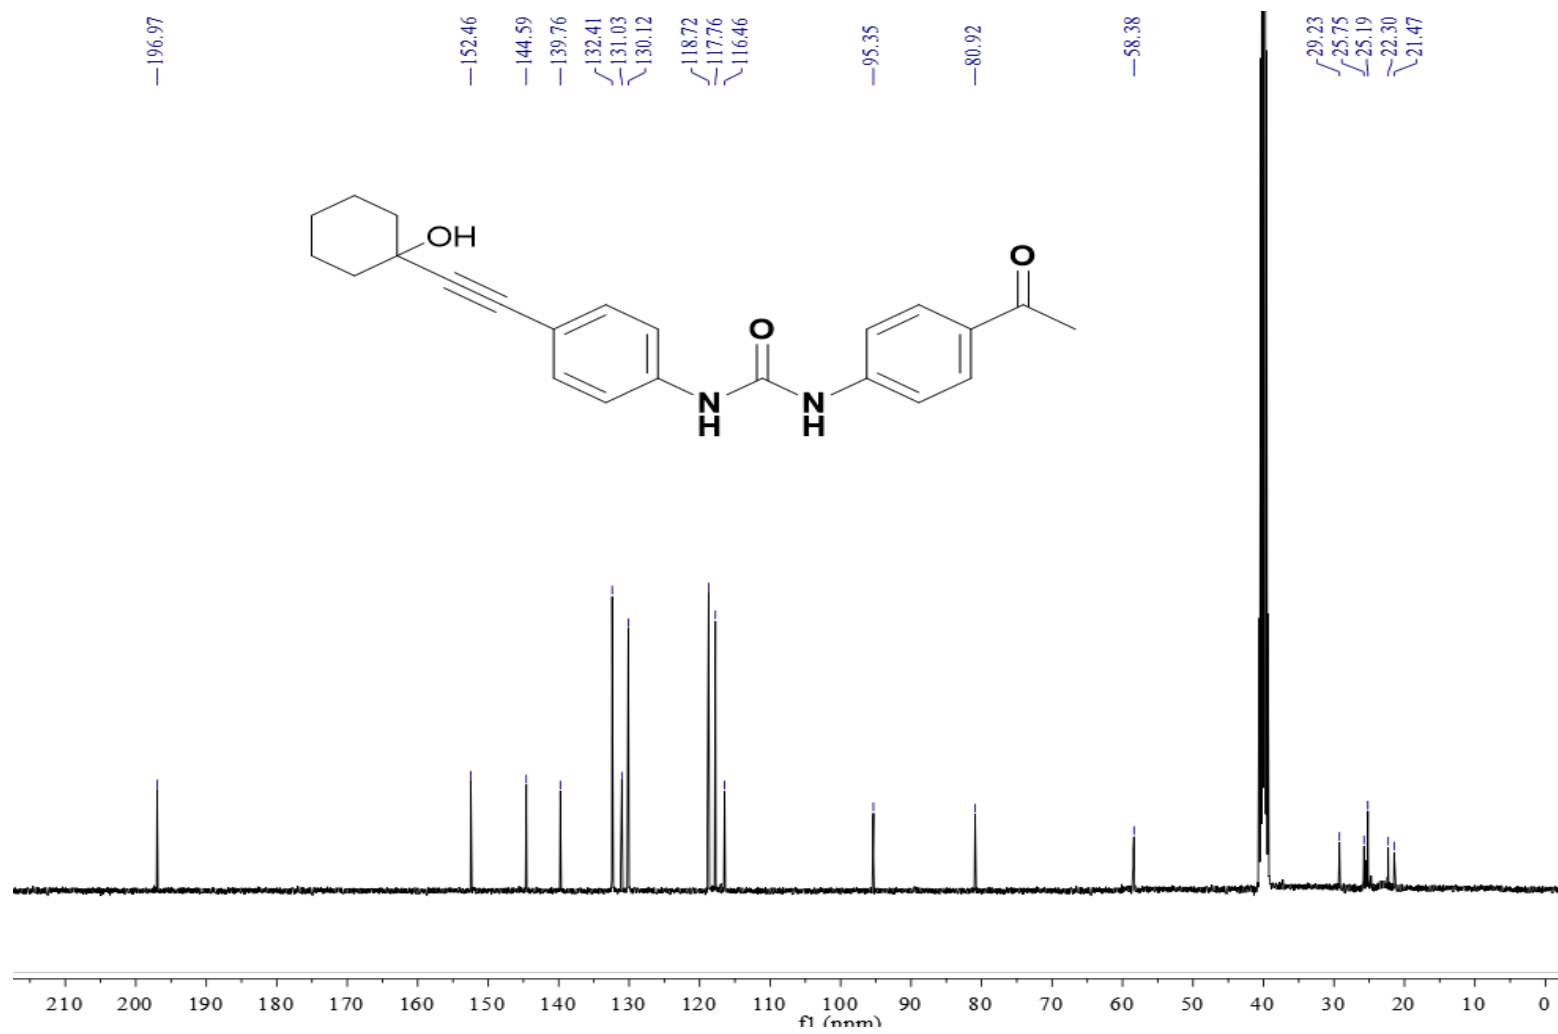

<sup>13</sup>C of compound (4I)

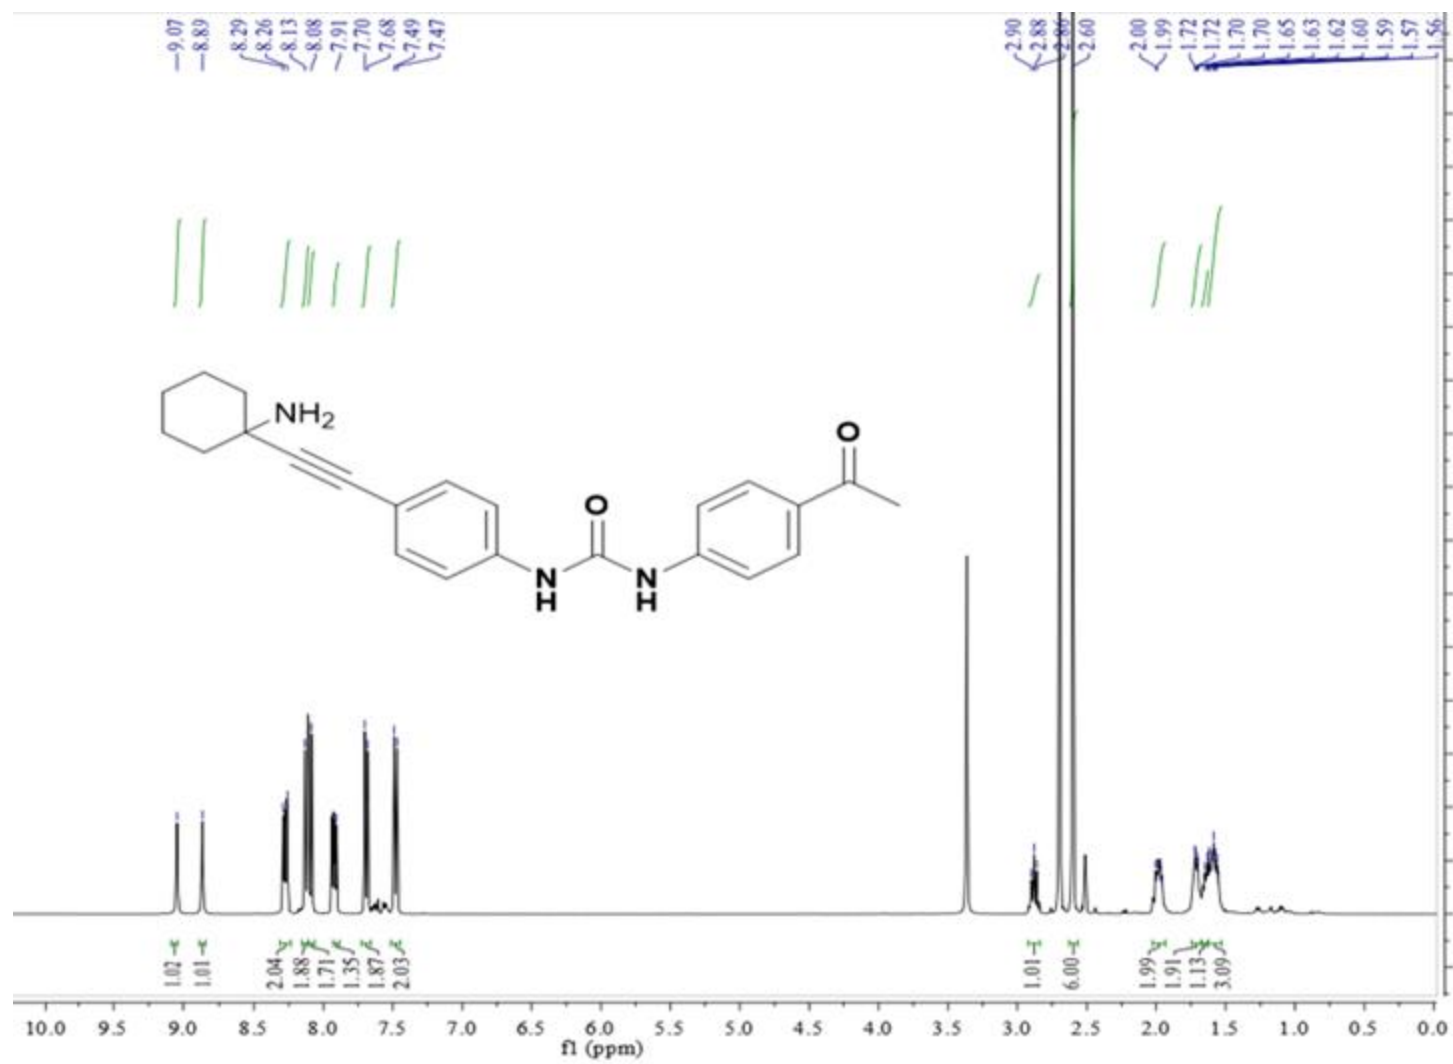

<sup>1</sup>H NMR of compound (4m)

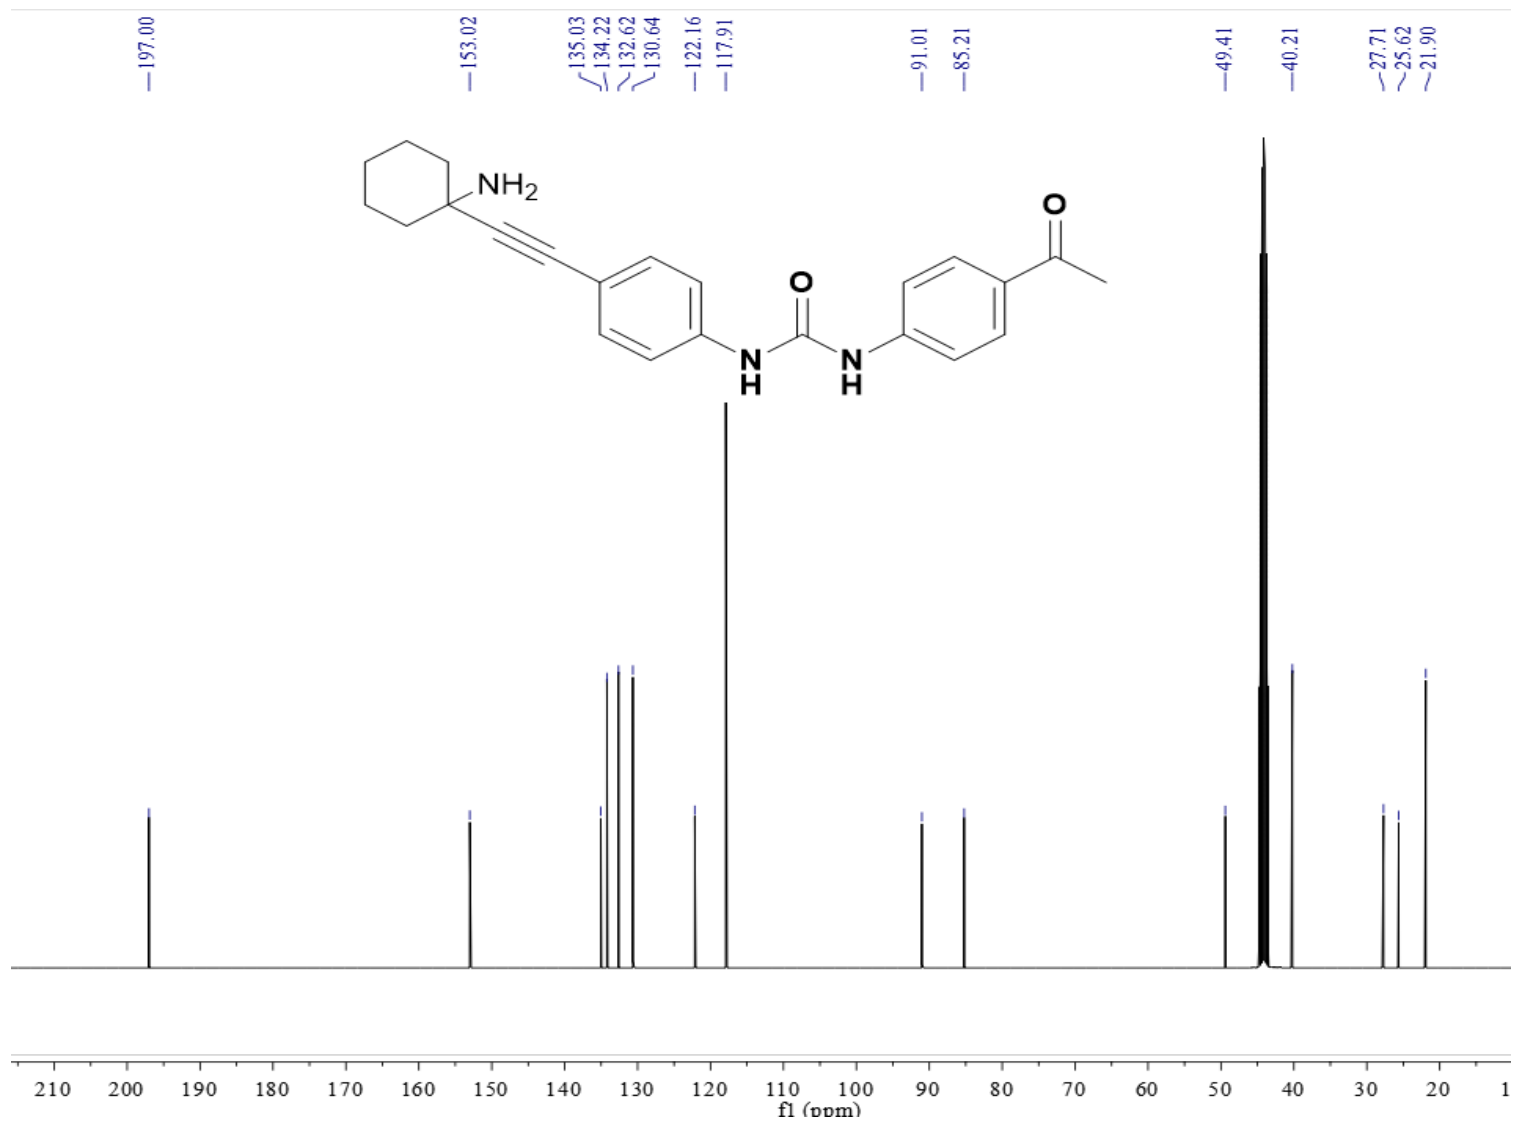

<sup>13</sup>C of compound (4m)

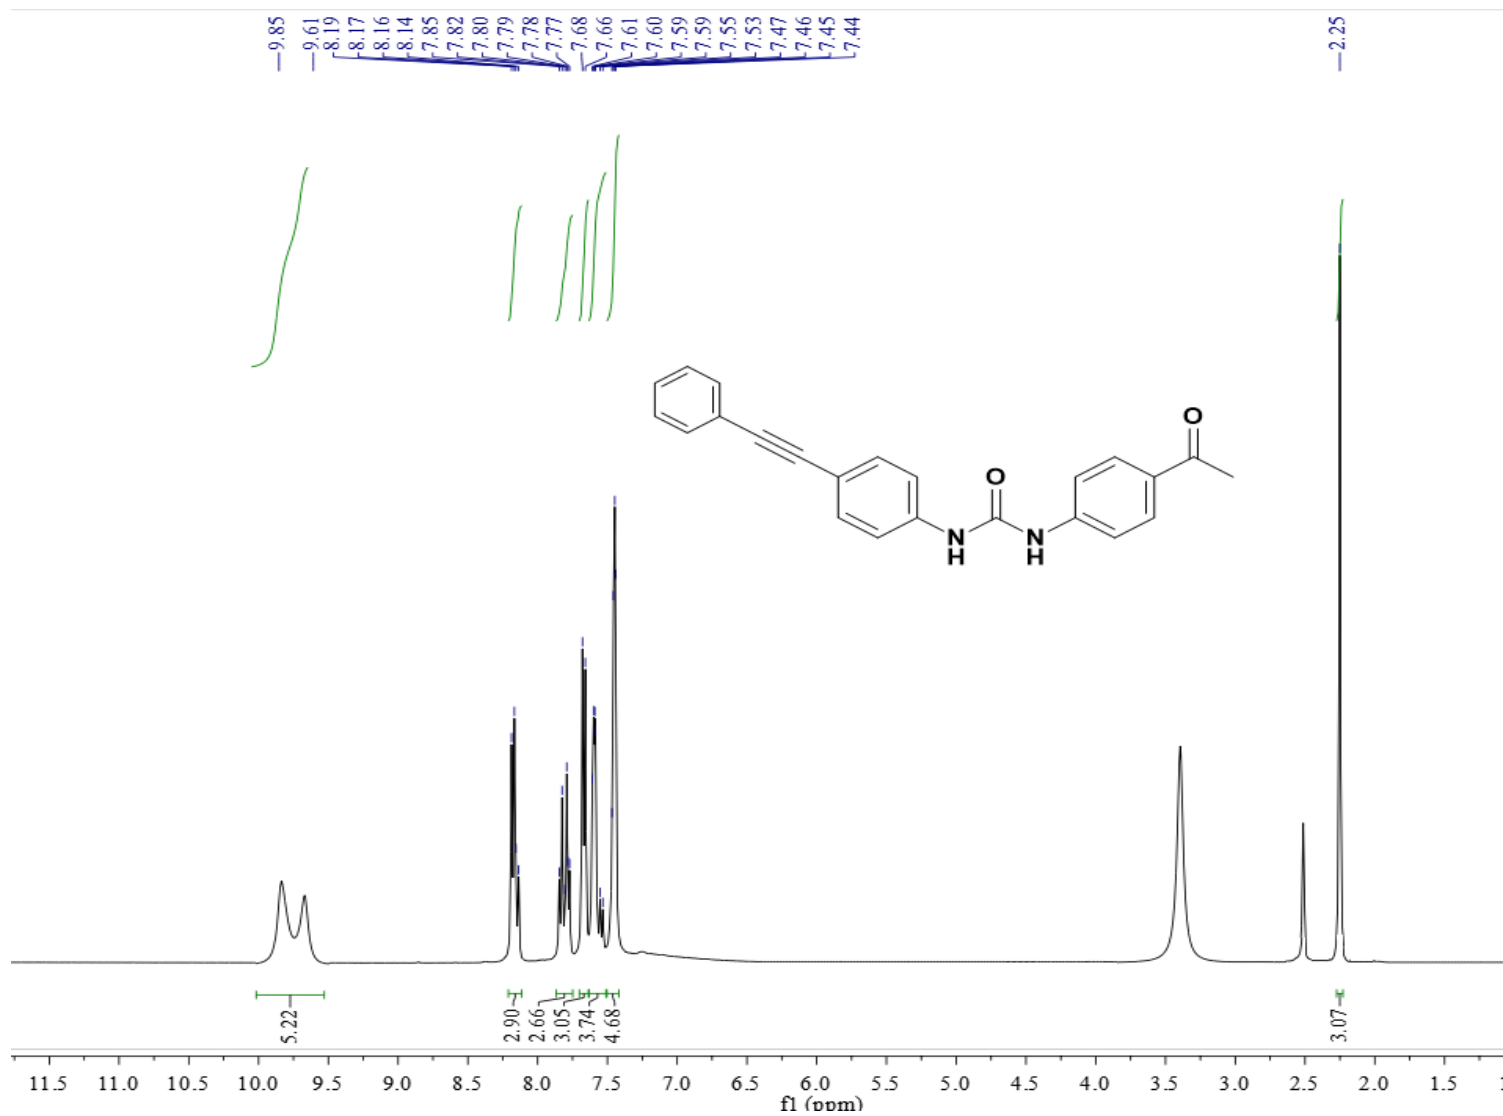

<sup>1</sup>H NMR of compound (4n)

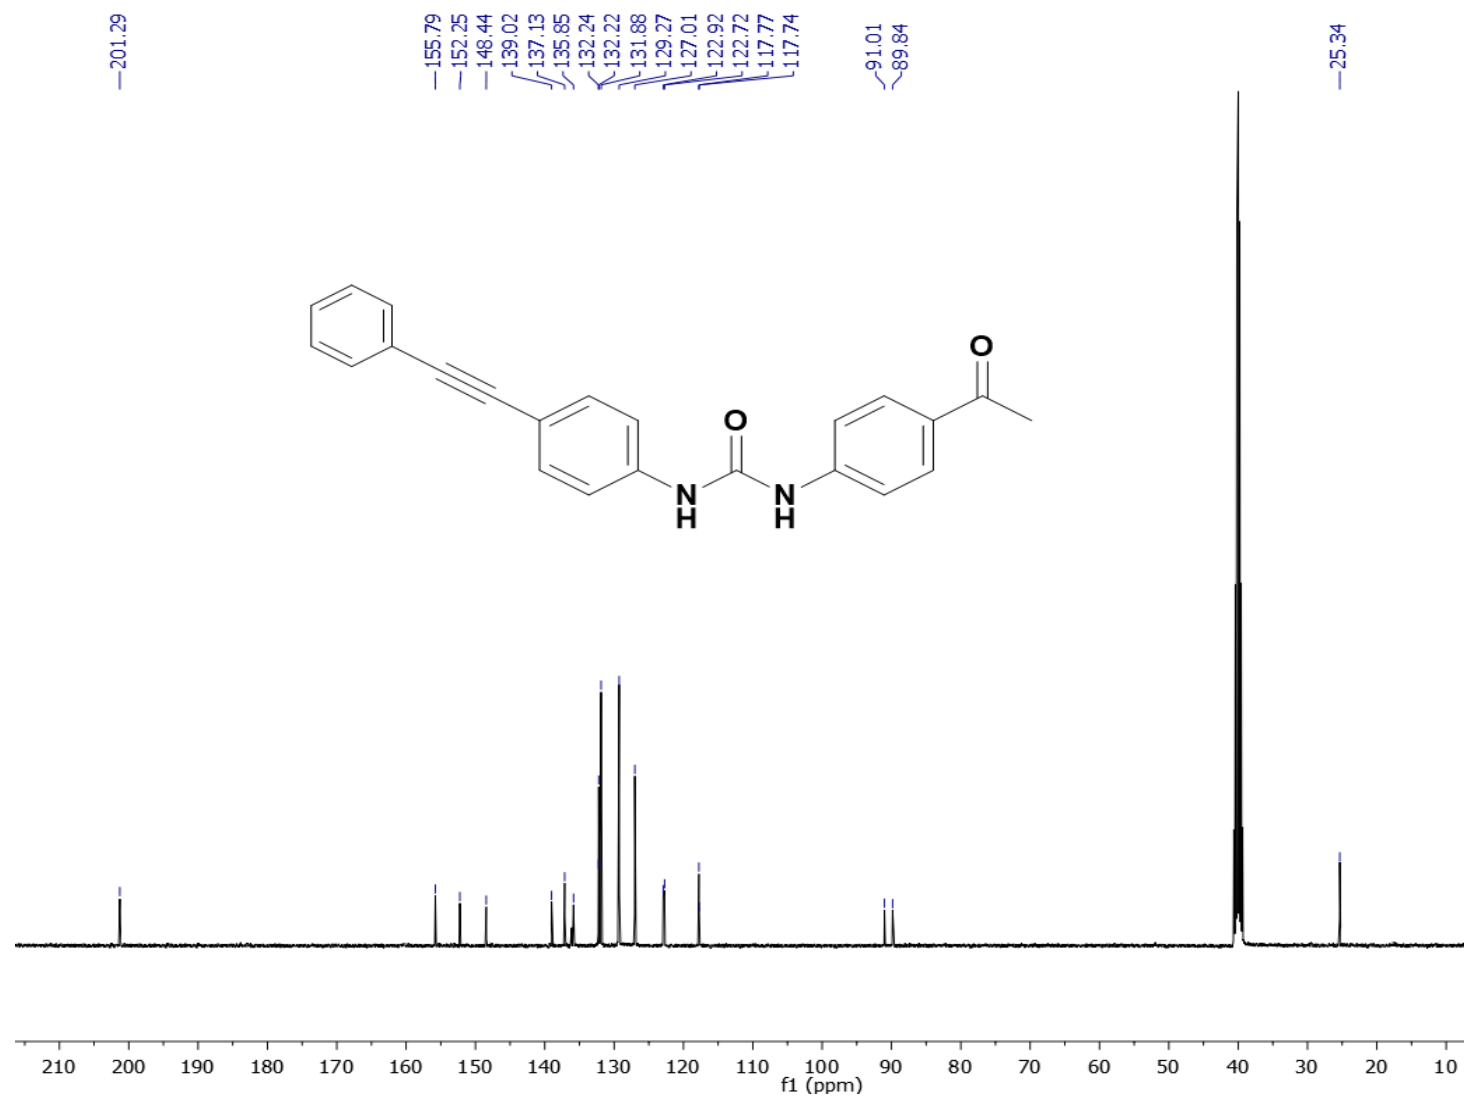

<sup>13</sup>C of compound (4n)

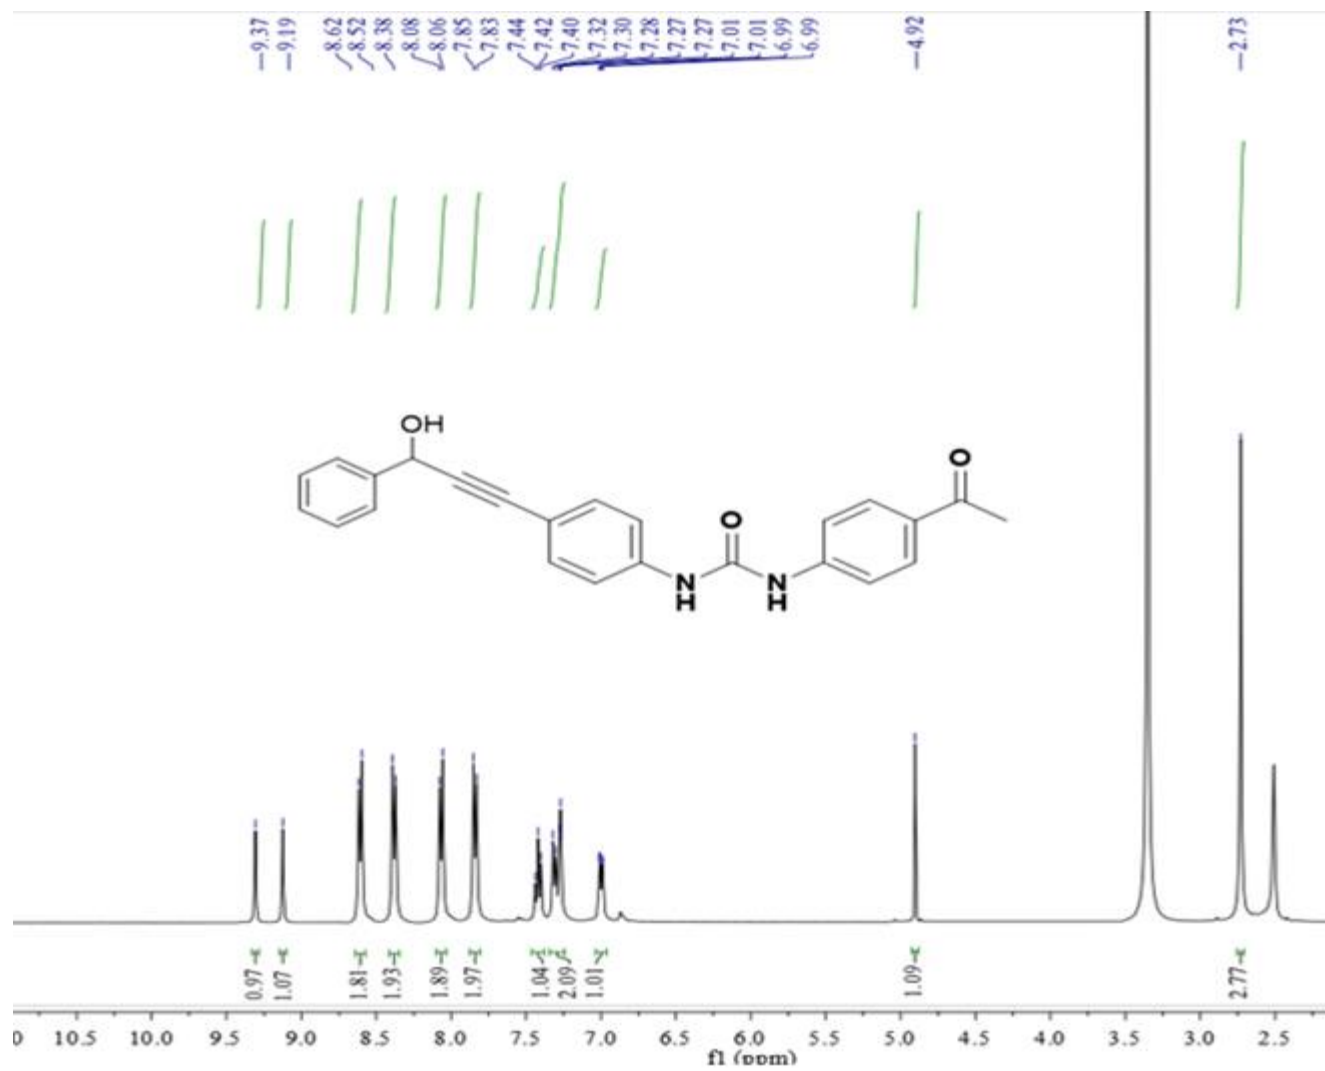

<sup>1</sup>H NMR of compound (4o)

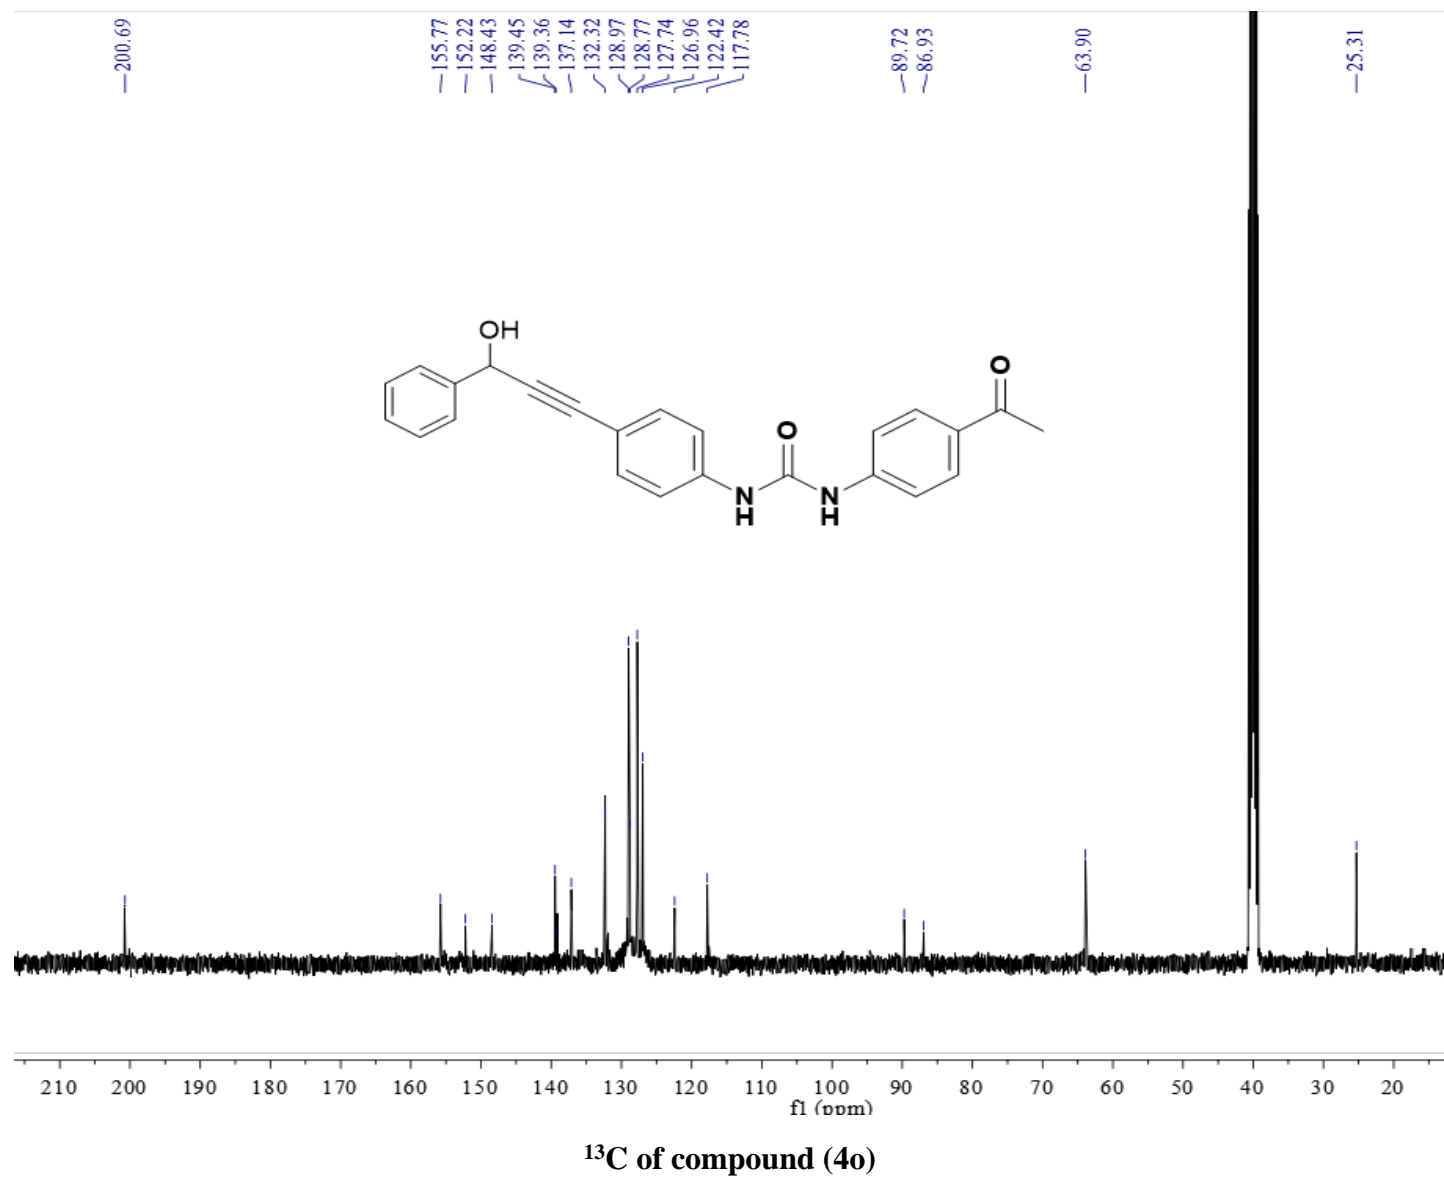

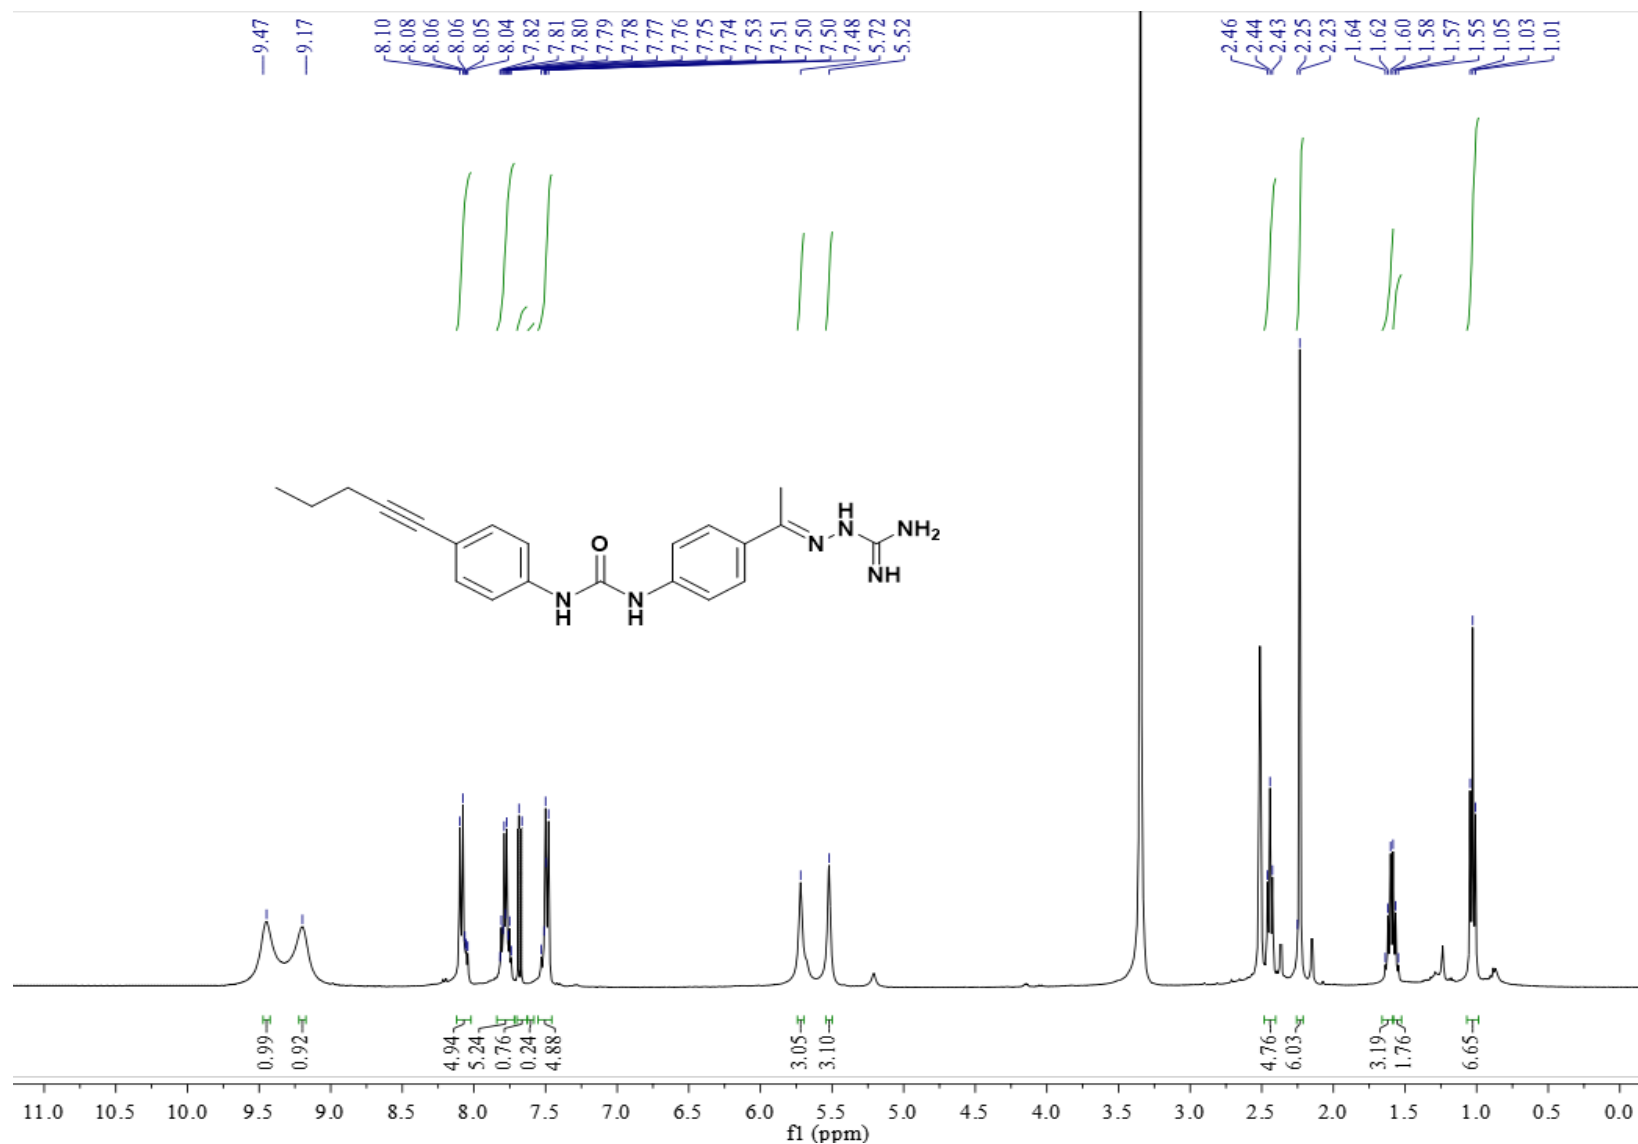

<sup>1</sup>H NMR of compound (5)



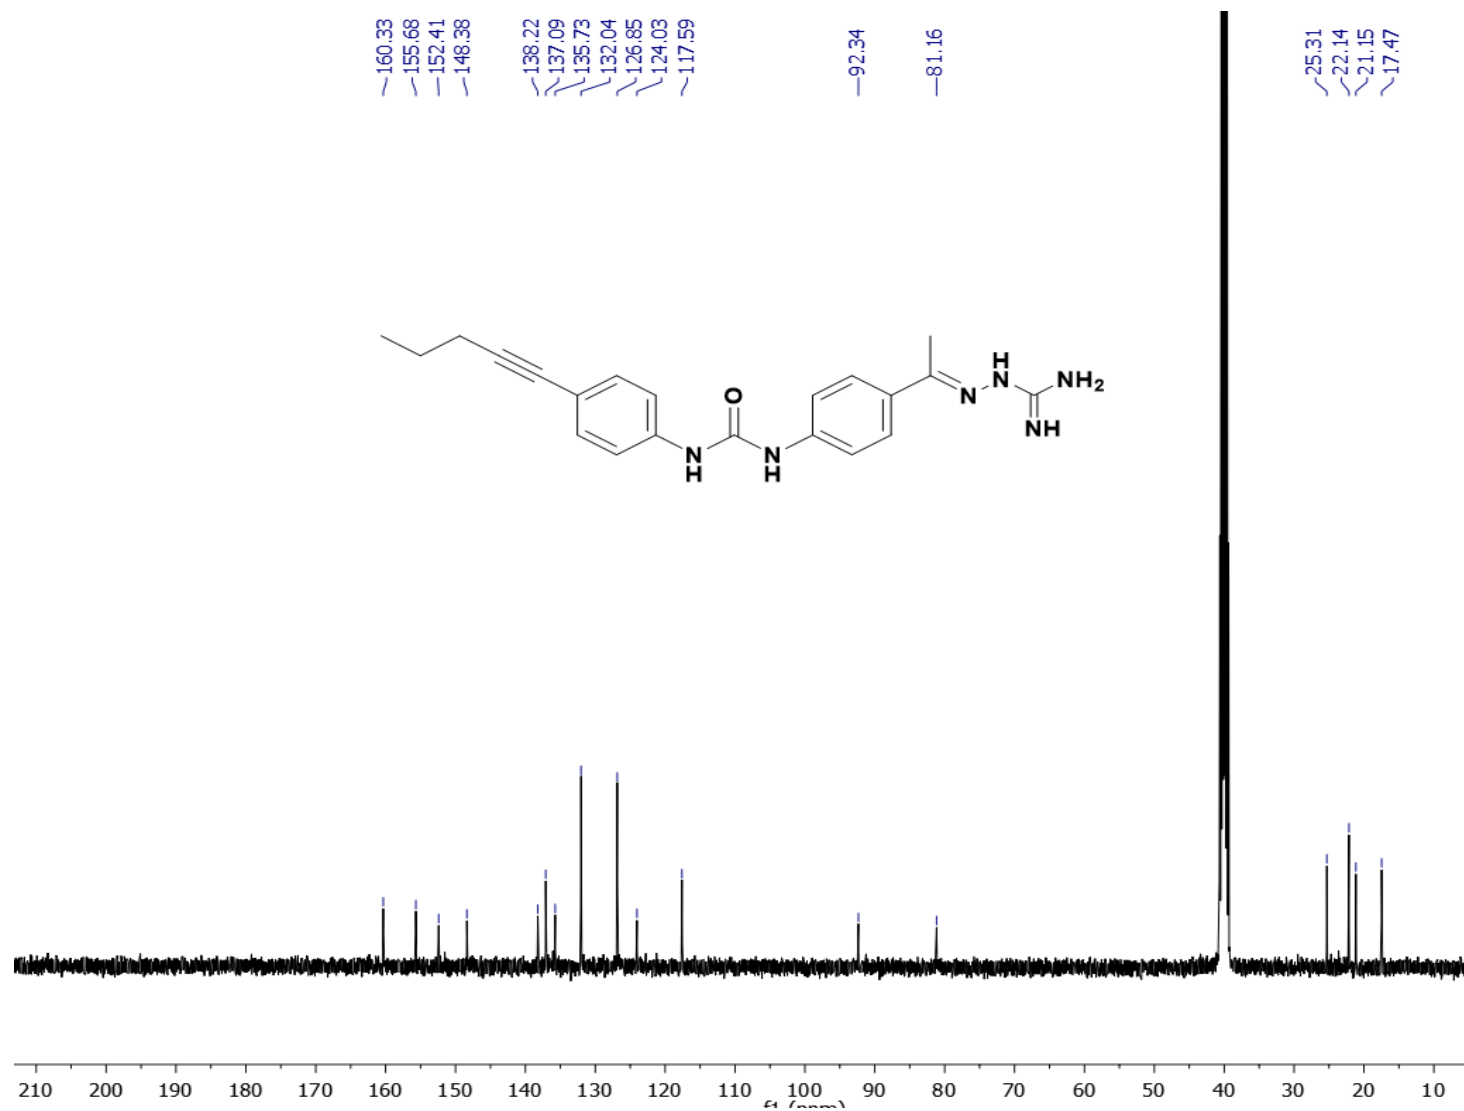

<sup>13</sup>C of compound (5)

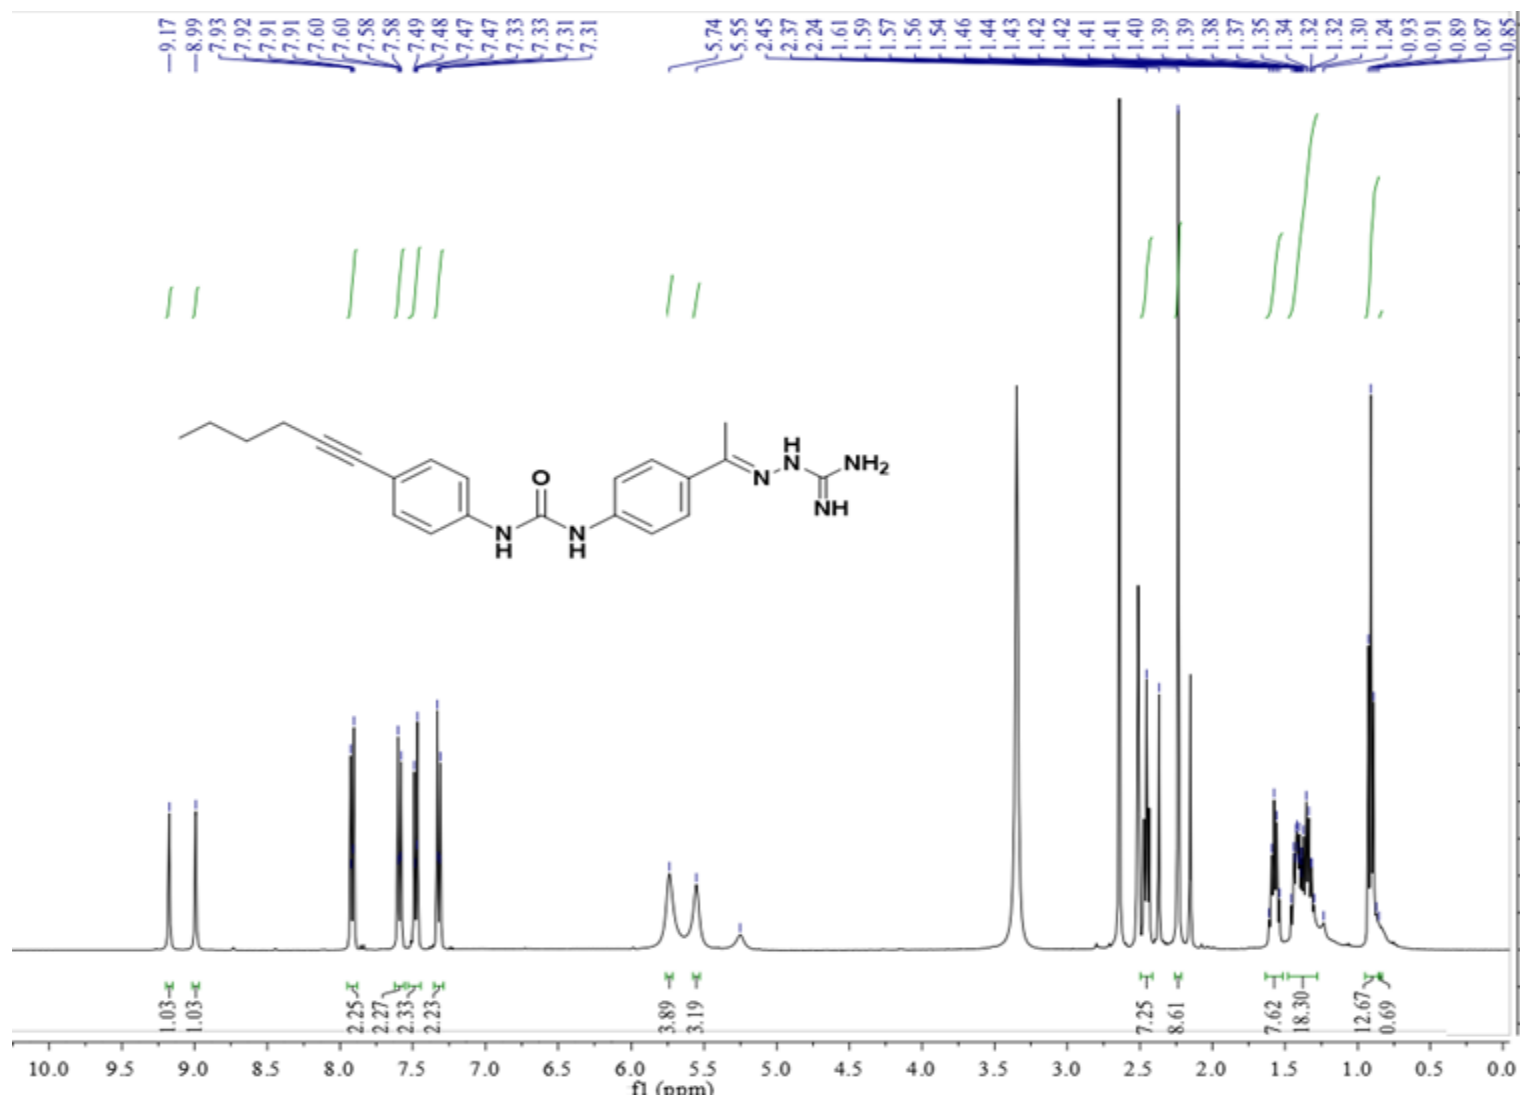

<sup>1</sup>H NMR of compound (6)

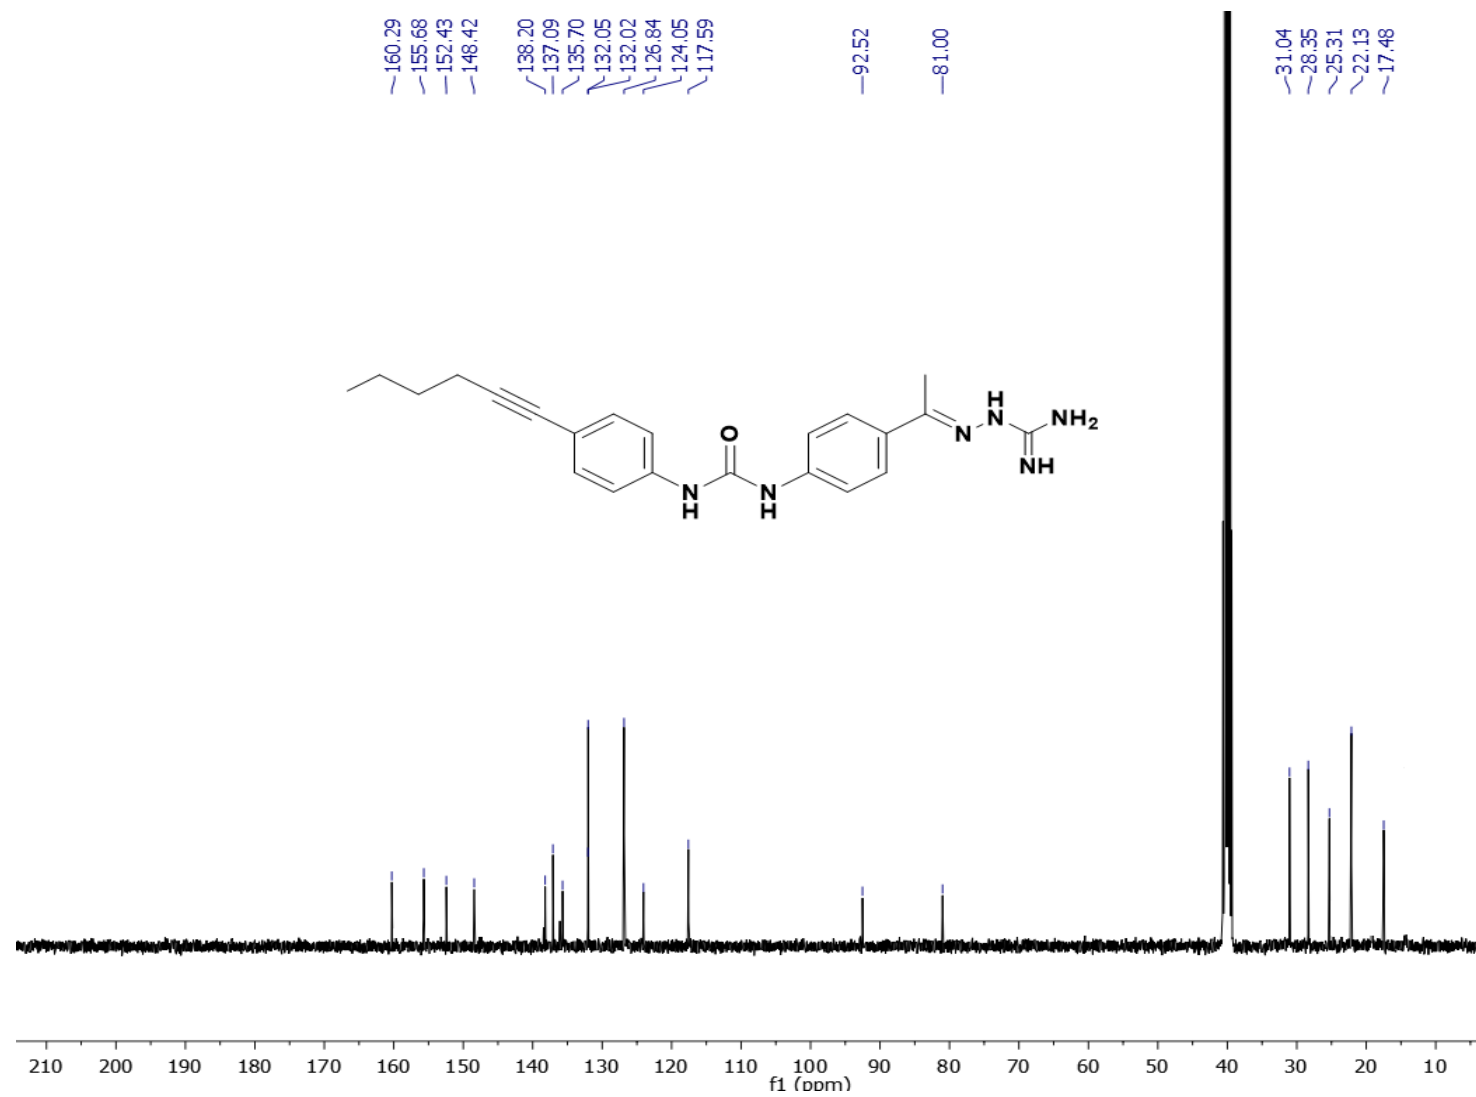

$^{13}\text{C}$  of compound (6)

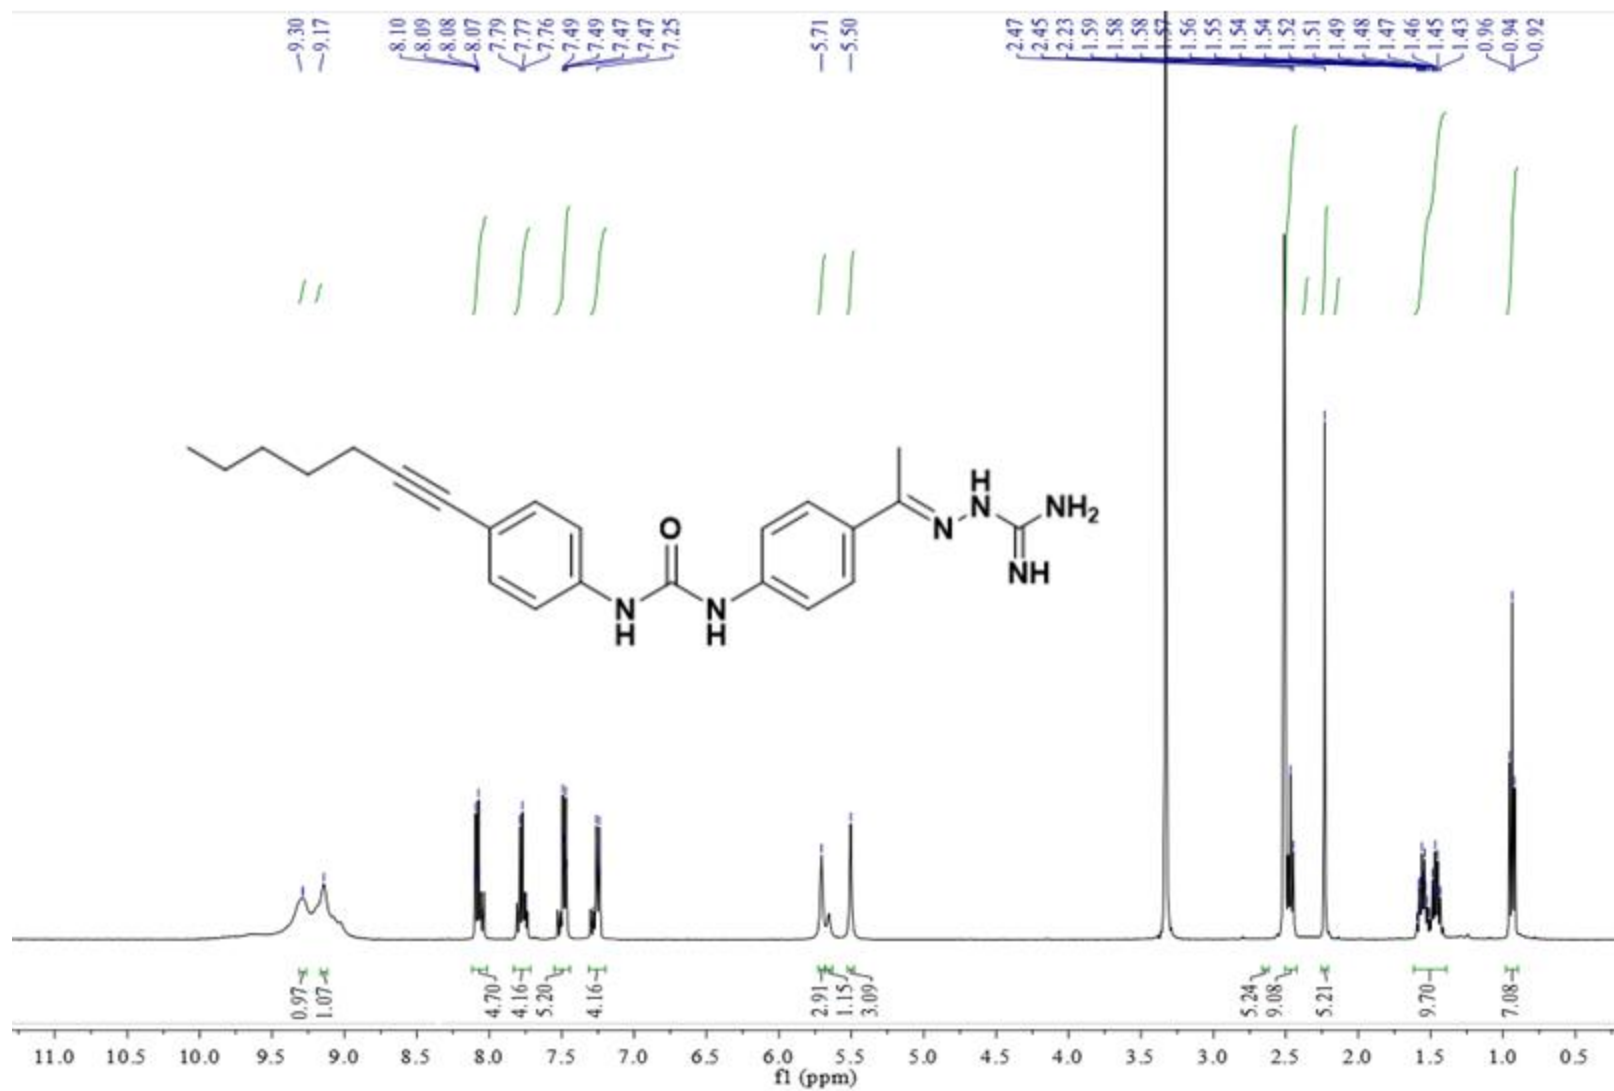

<sup>1</sup>H NMR of compound (7)

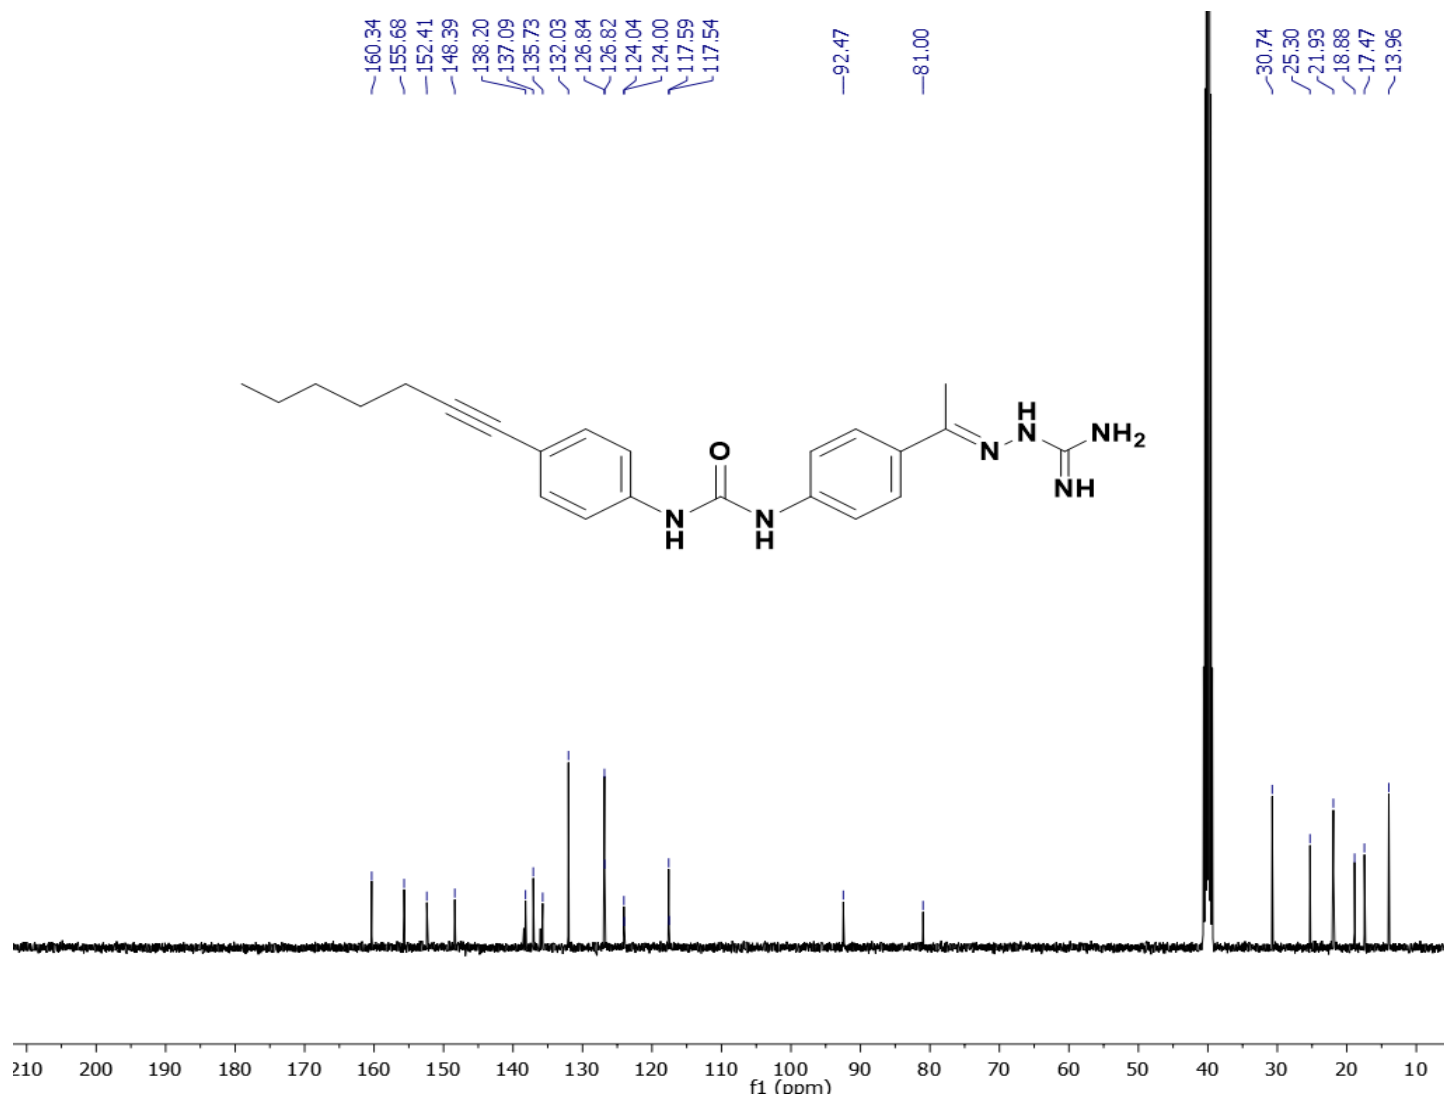

<sup>13</sup>C of compound (7)

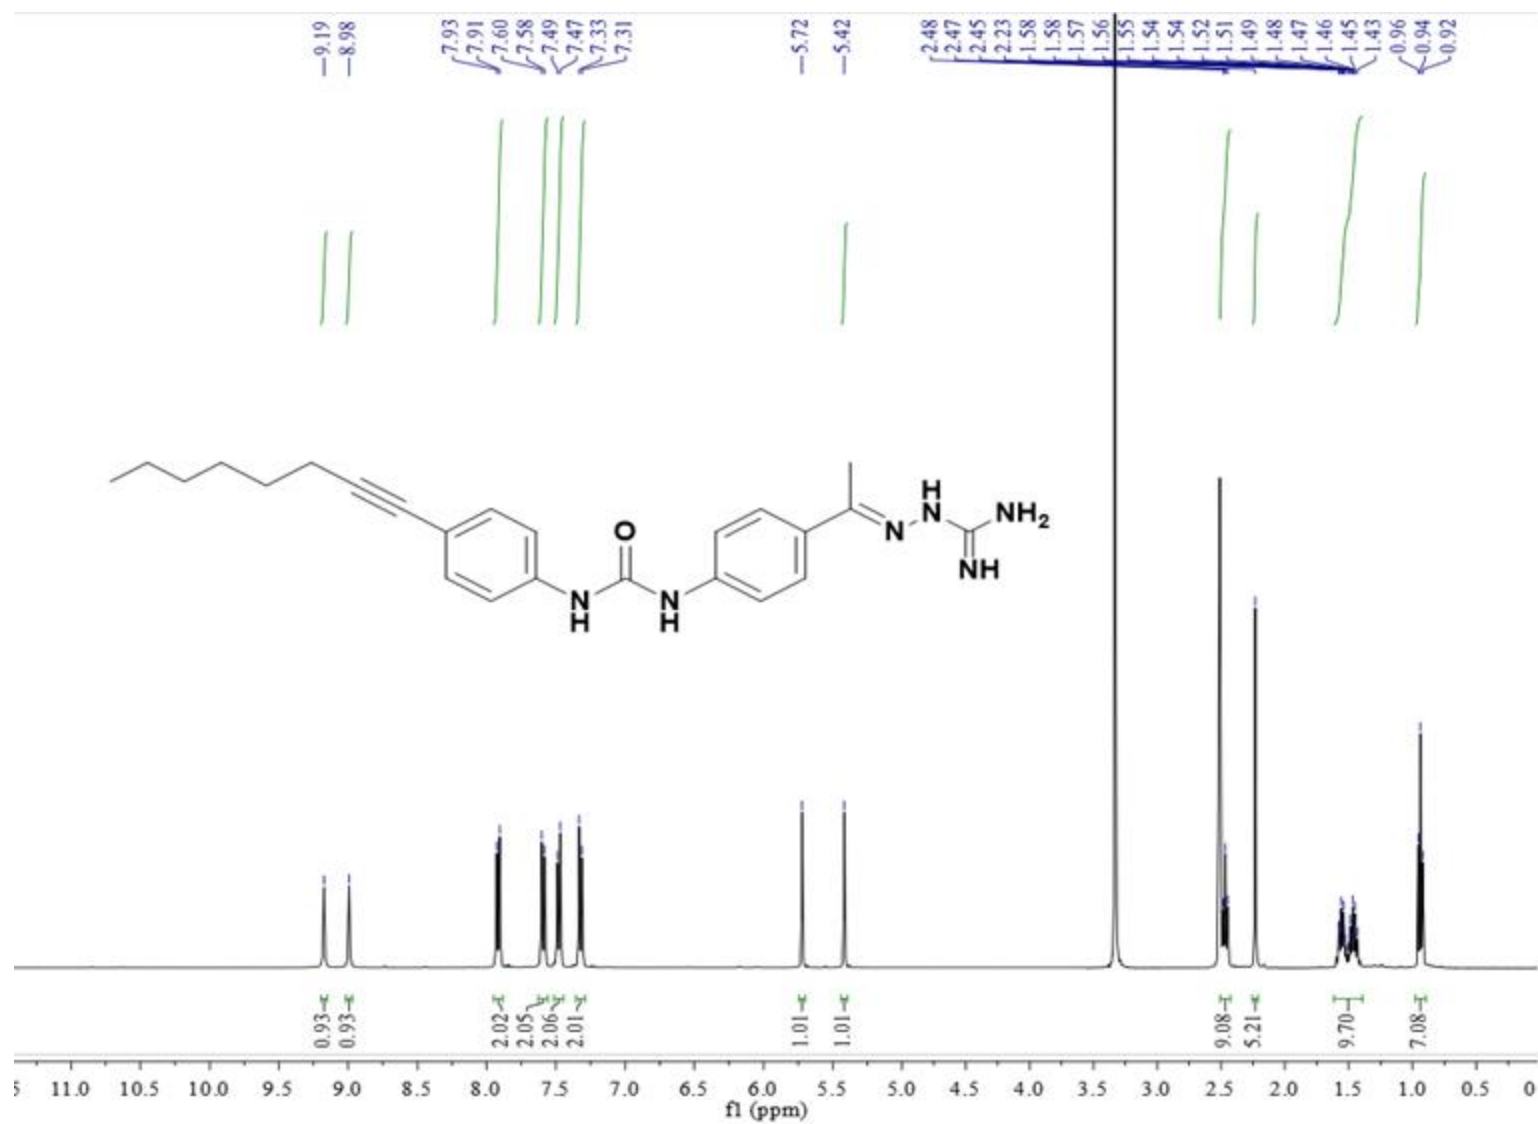

<sup>1</sup>H NMR of compound (8)

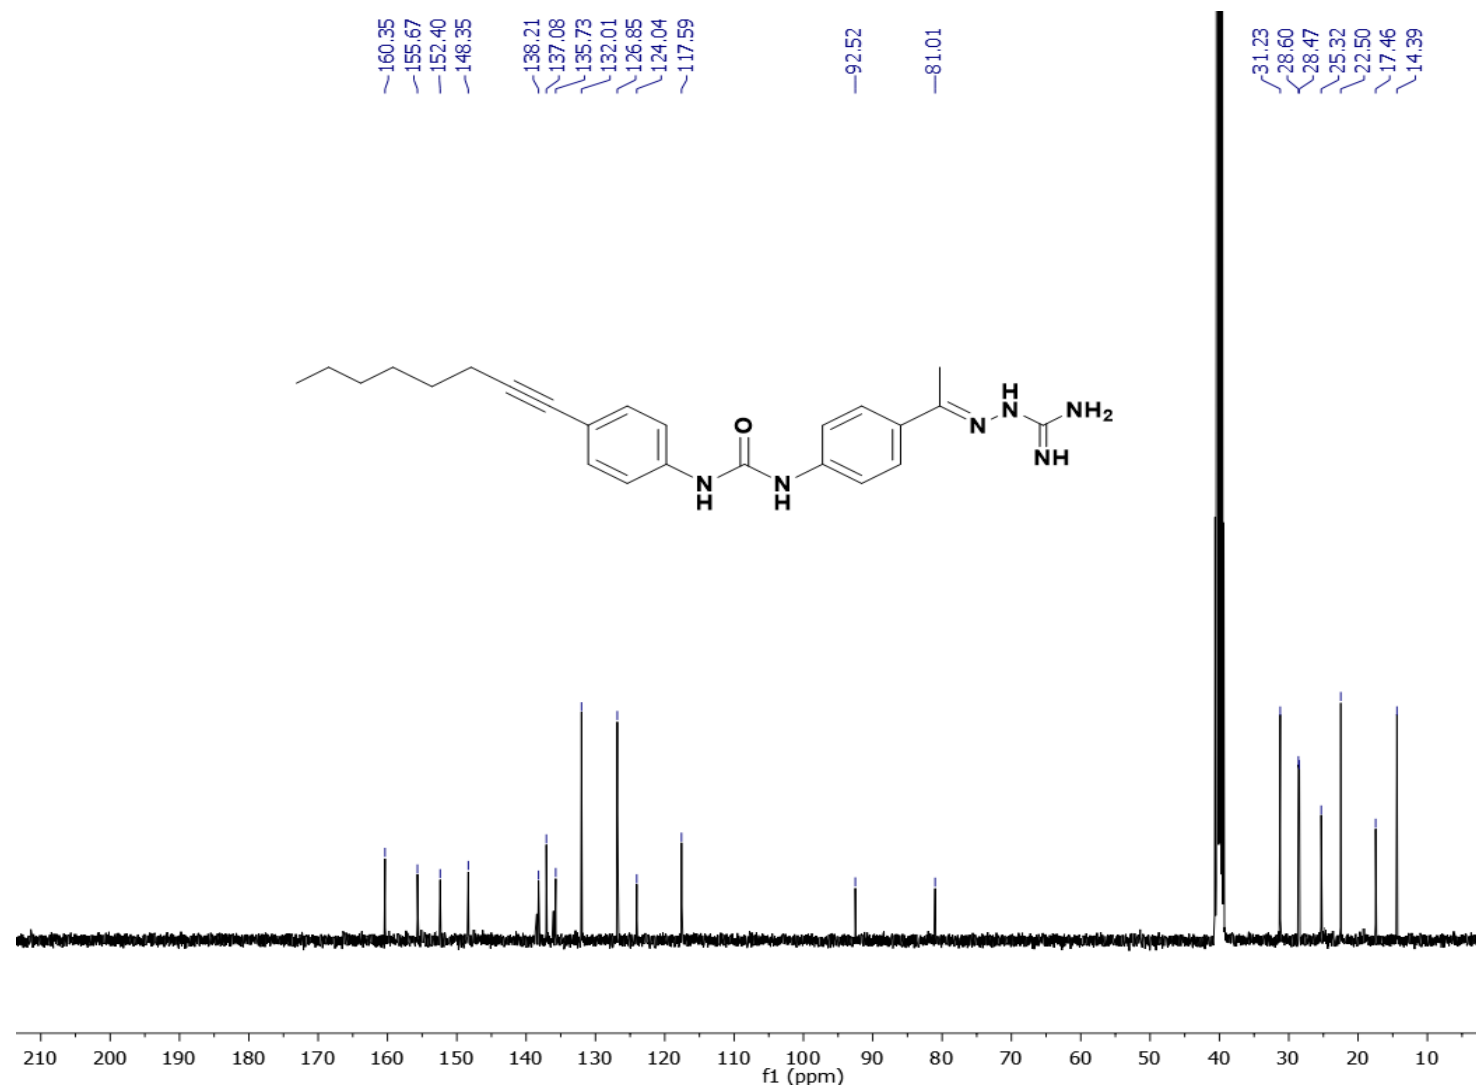

<sup>13</sup>C of compound (8)

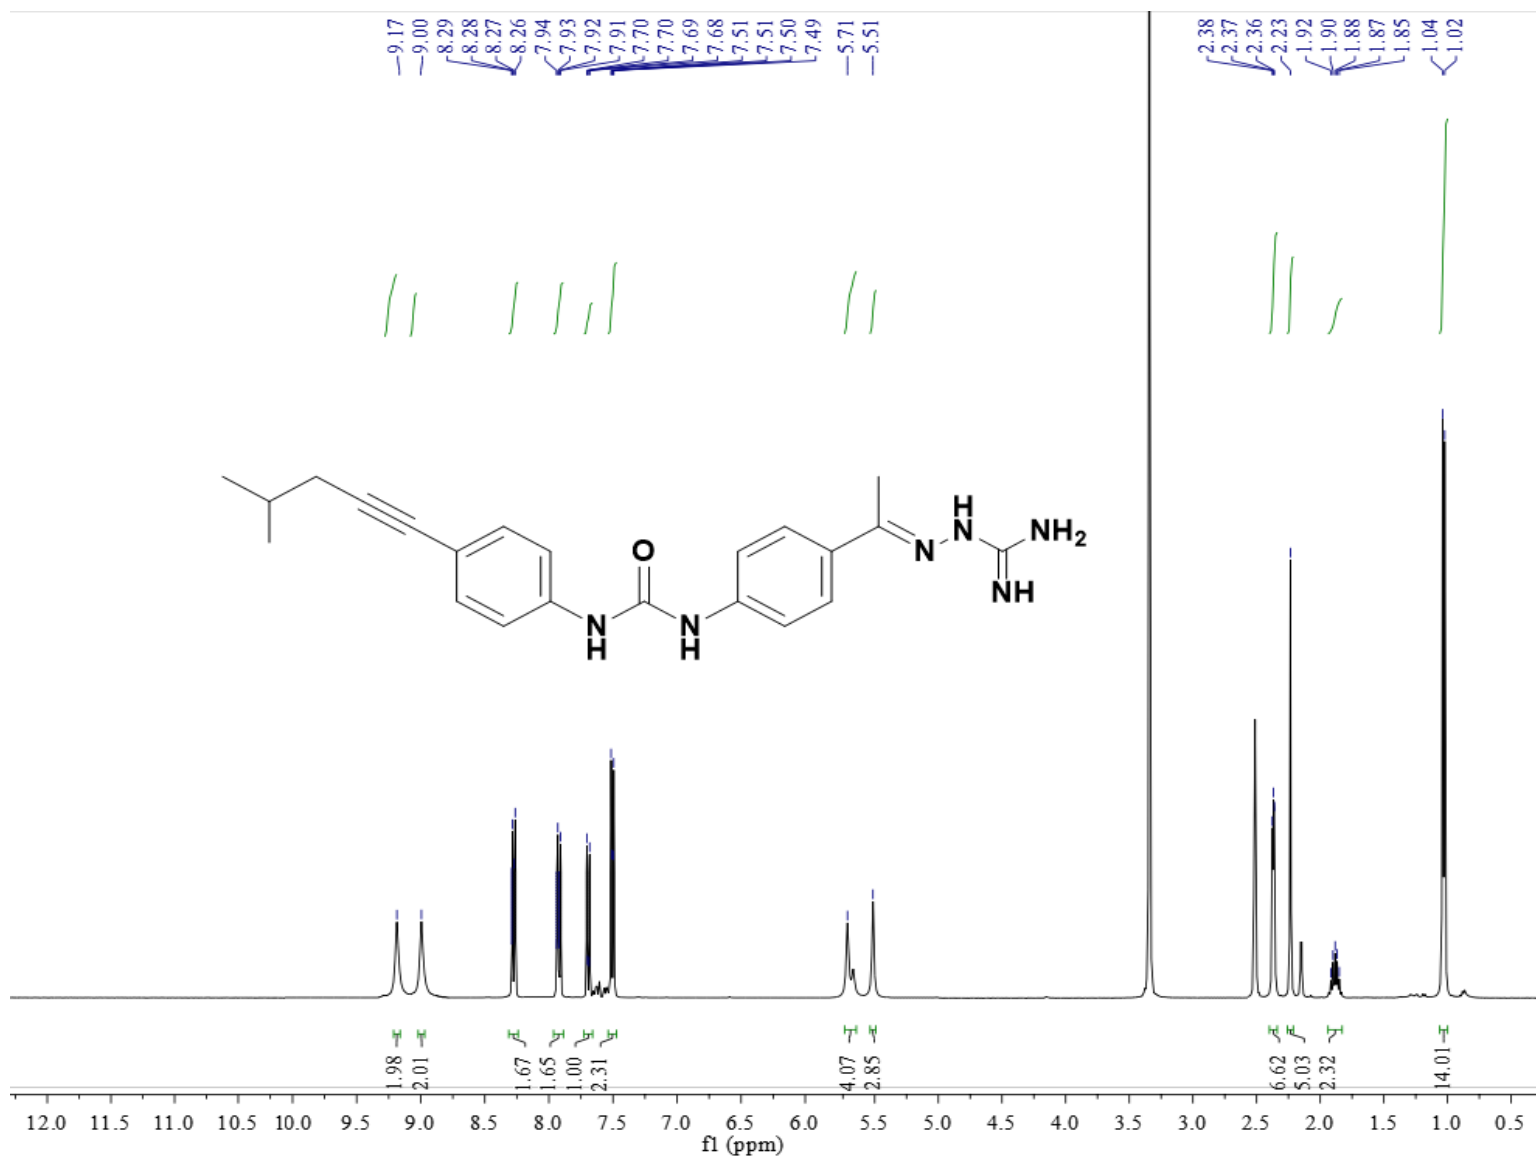

<sup>1</sup>H NMR of compound (9)



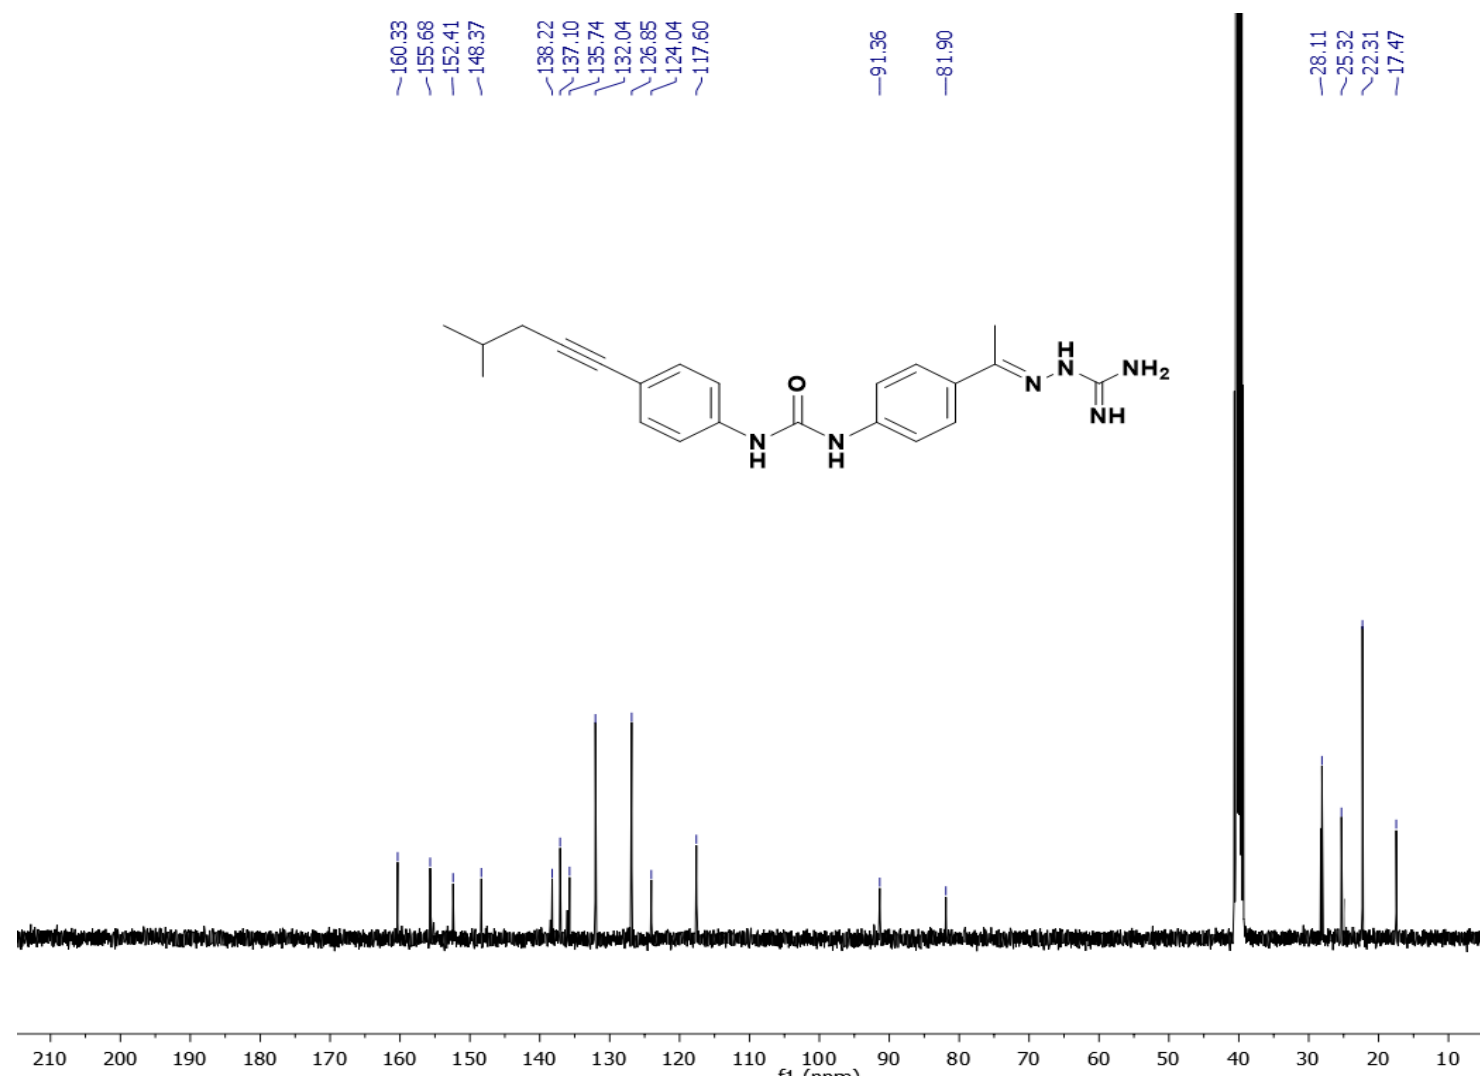

<sup>13</sup>C of compound (9)

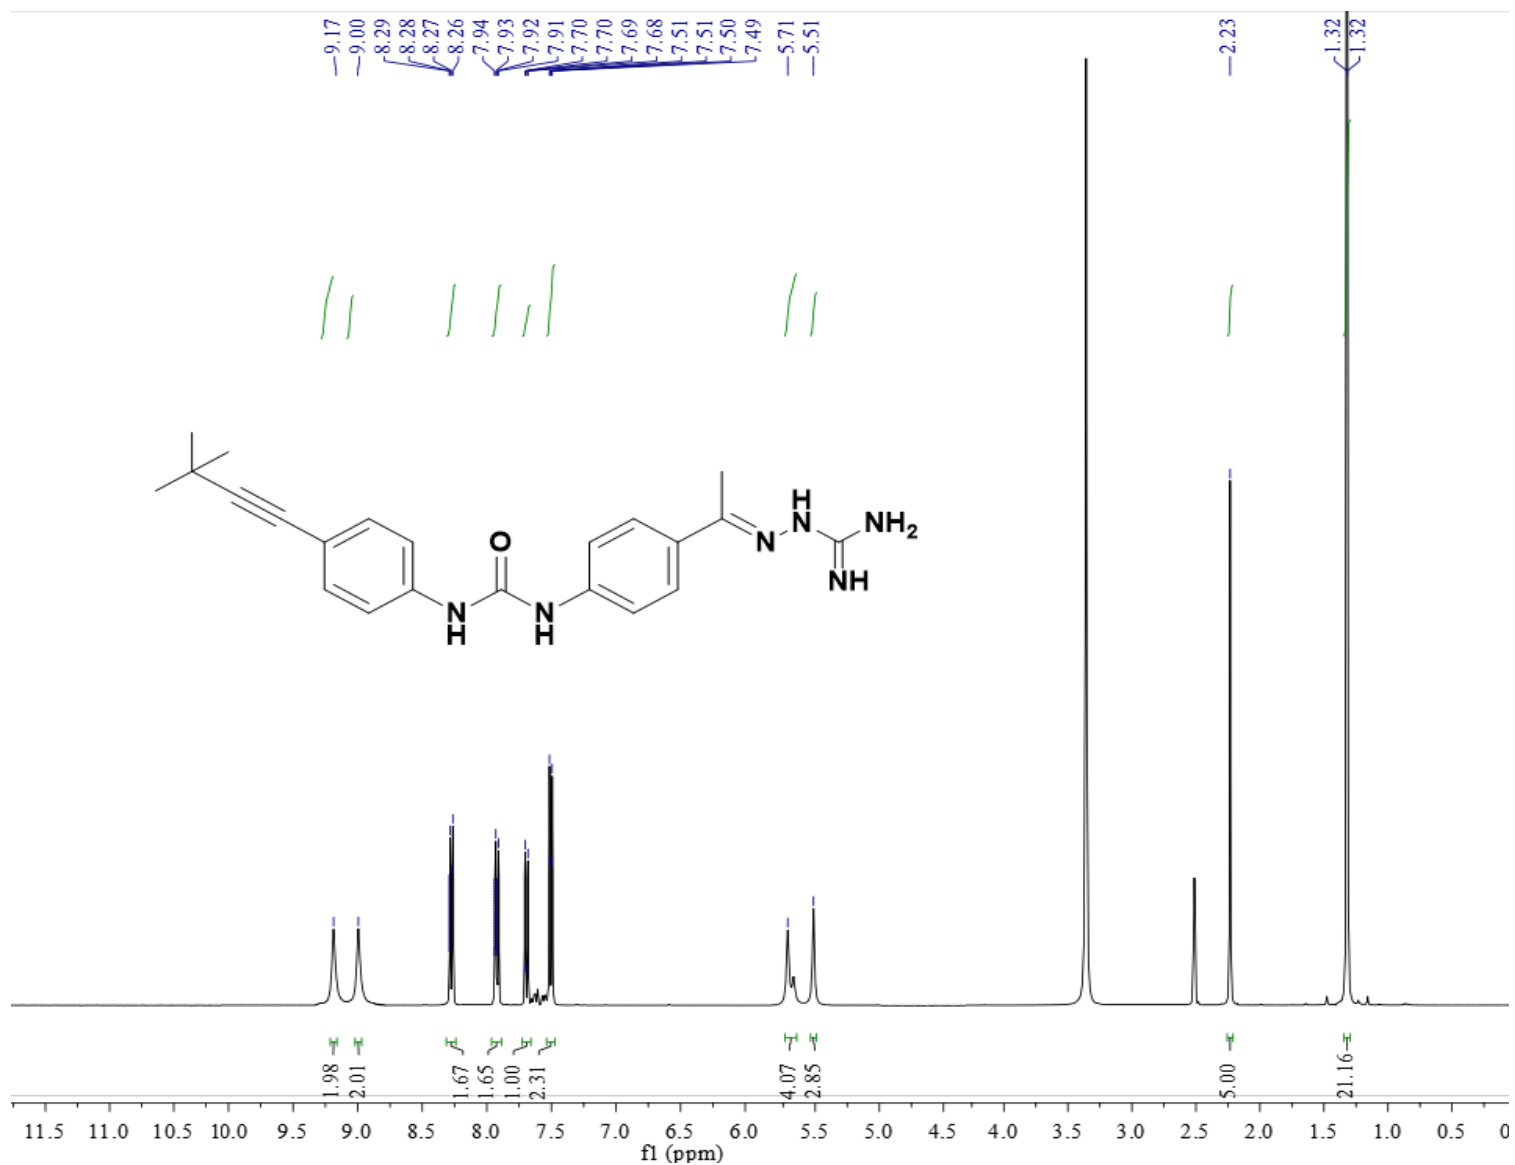

<sup>1</sup>H NMR of compound (10)

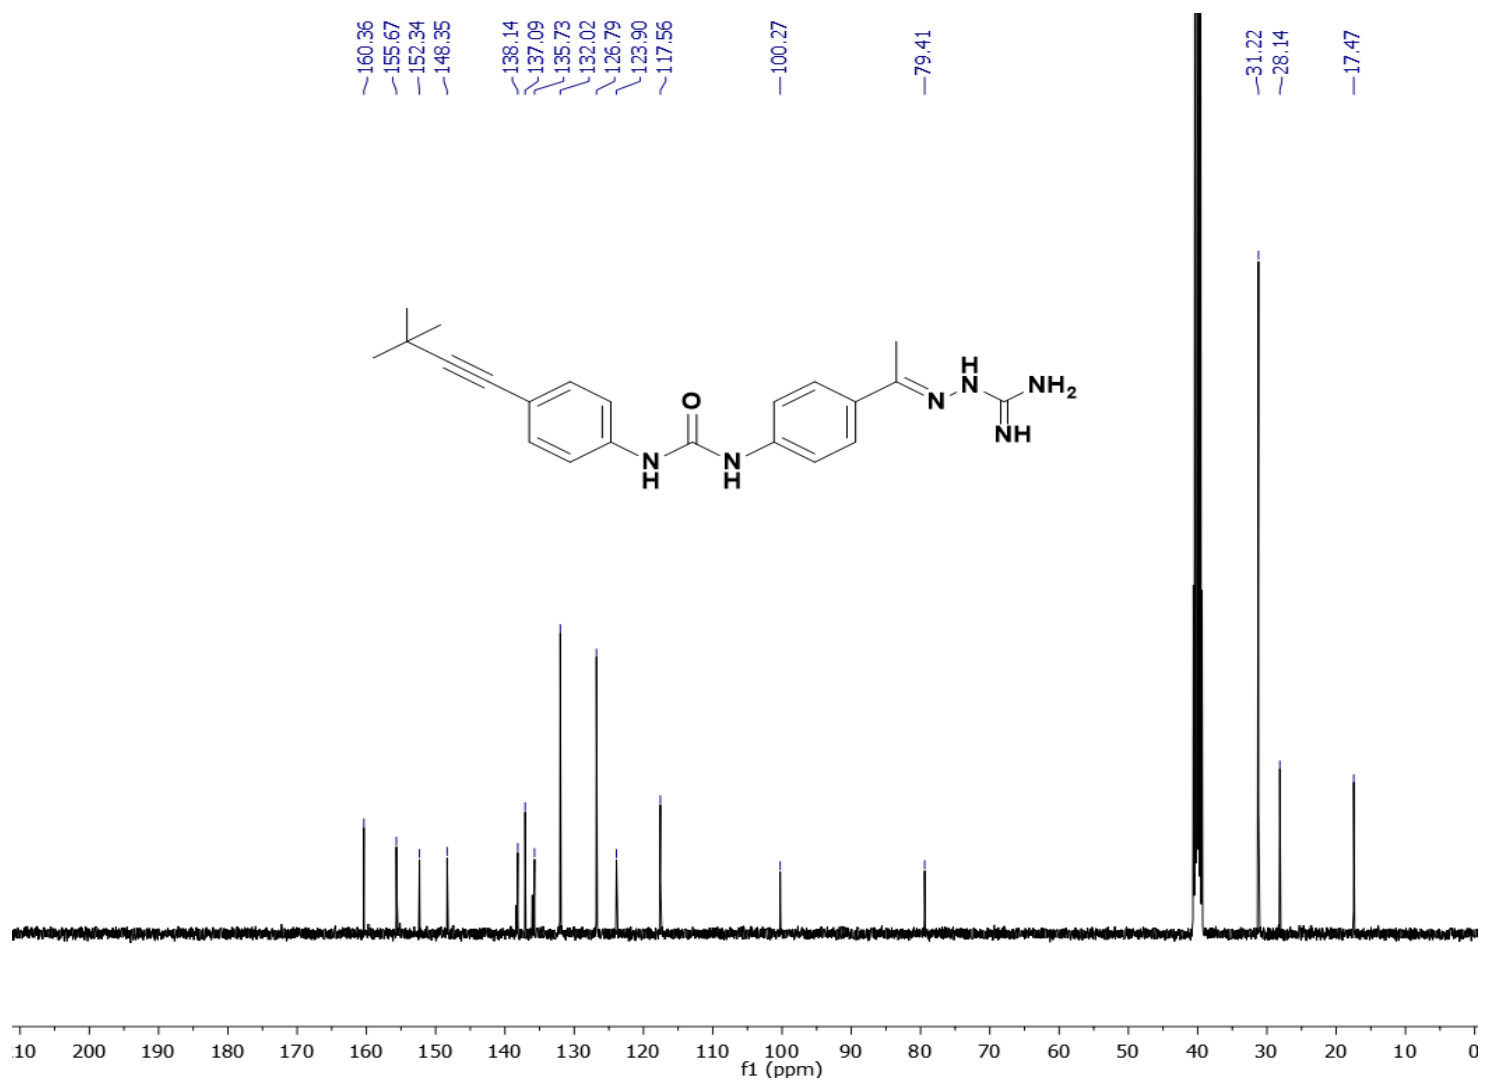

<sup>13</sup>C of compound (10)

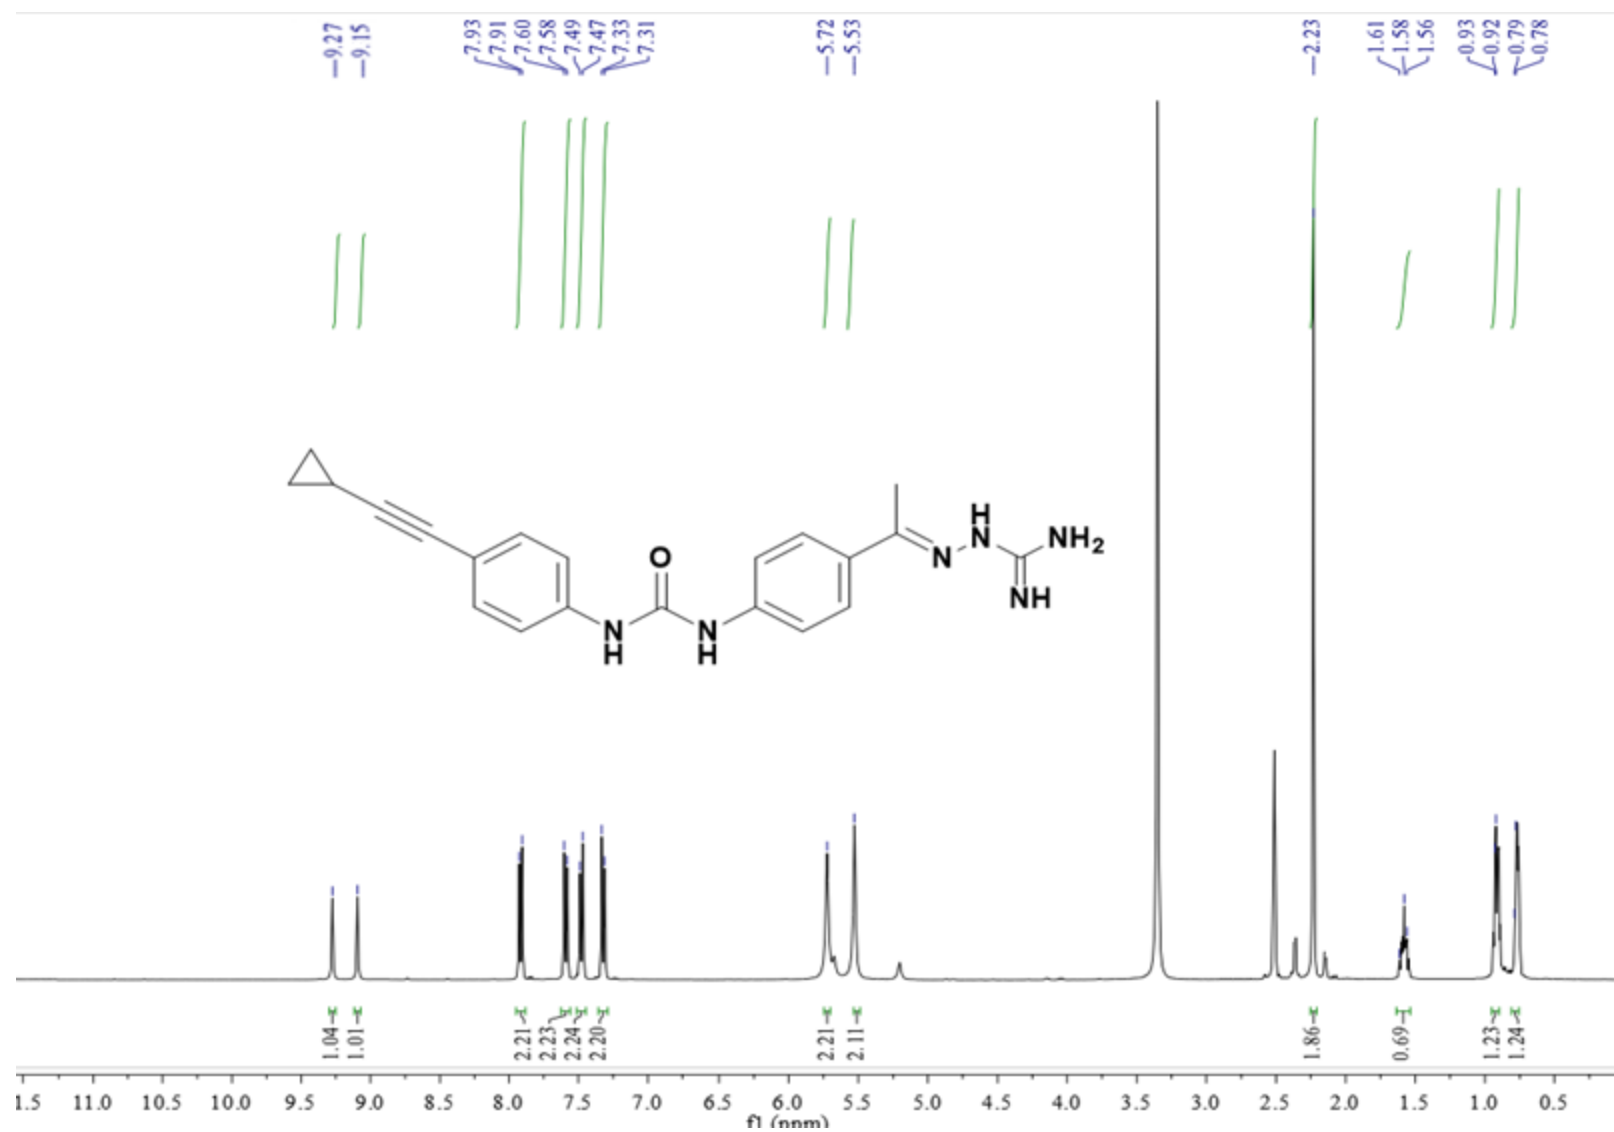

<sup>1</sup>H NMR of compound (11)

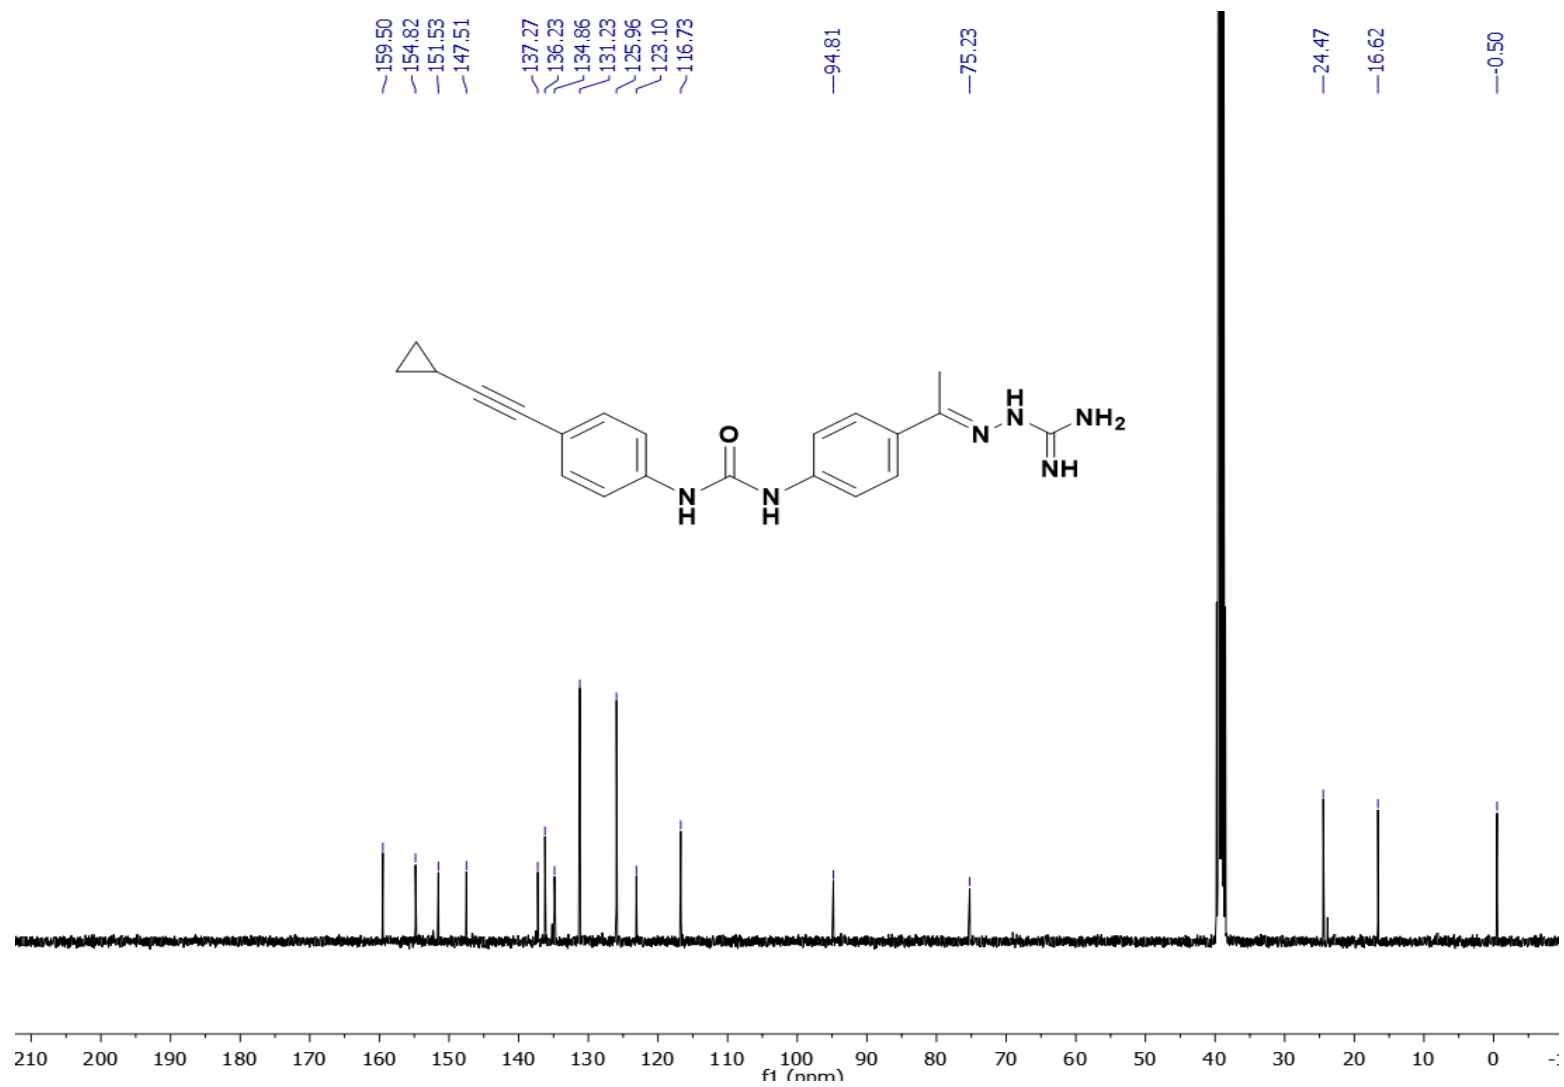

<sup>13</sup>C of compound (11)

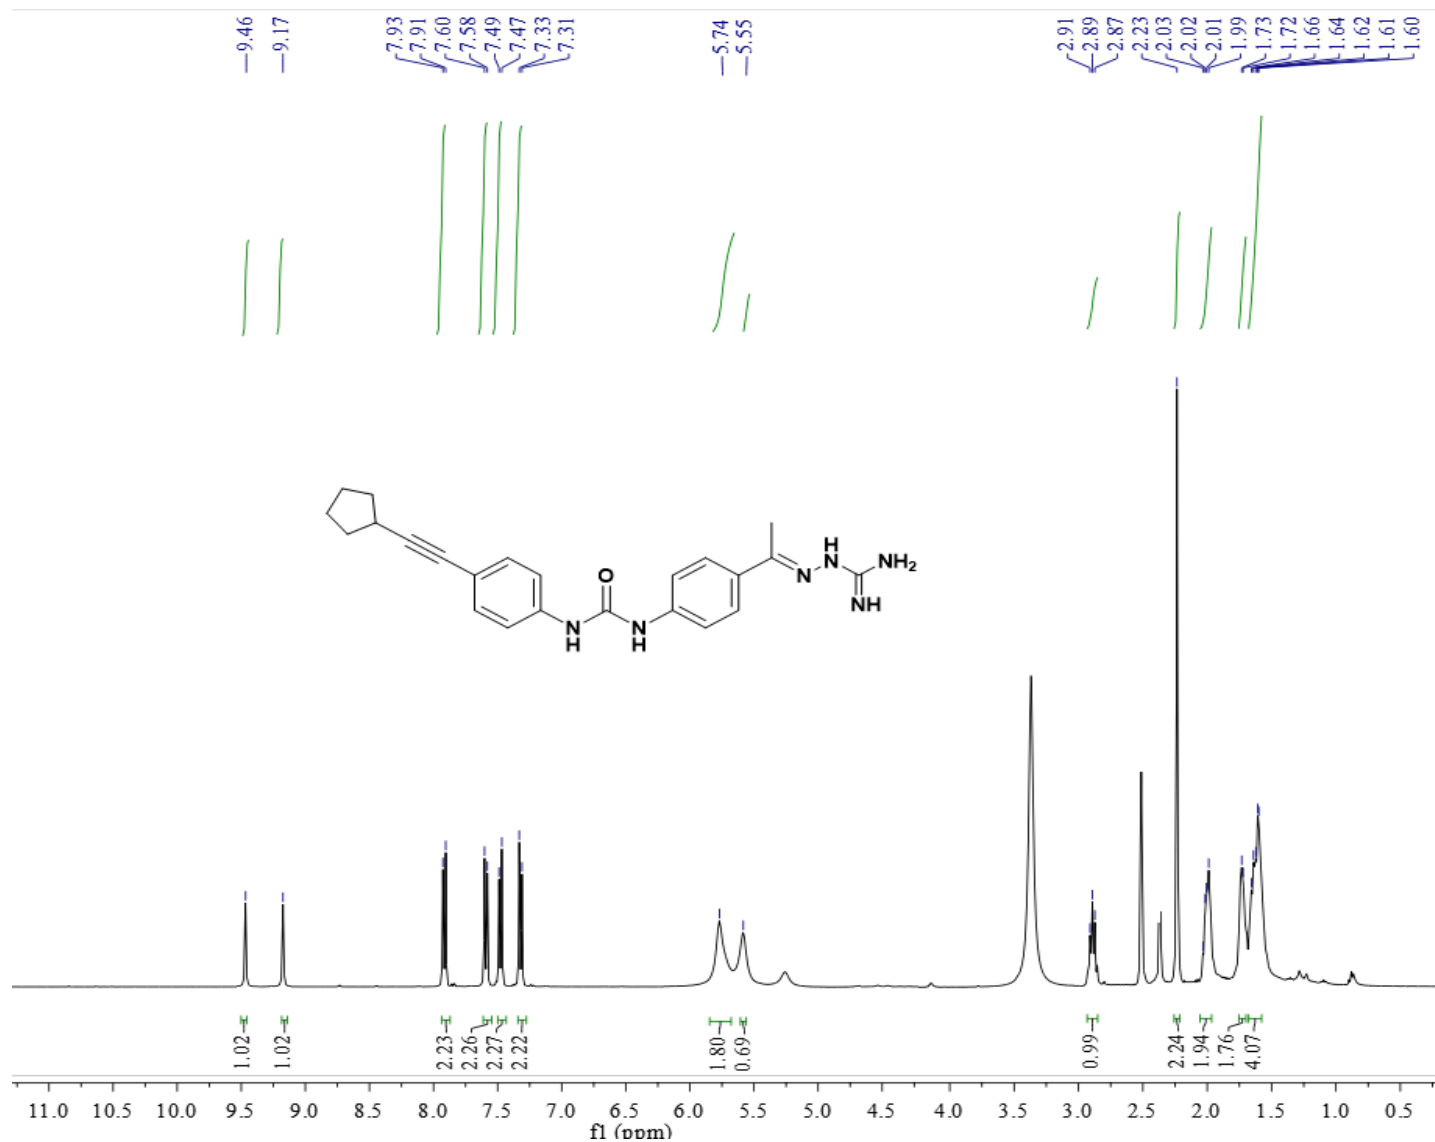

<sup>1</sup>H NMR of compound (12)

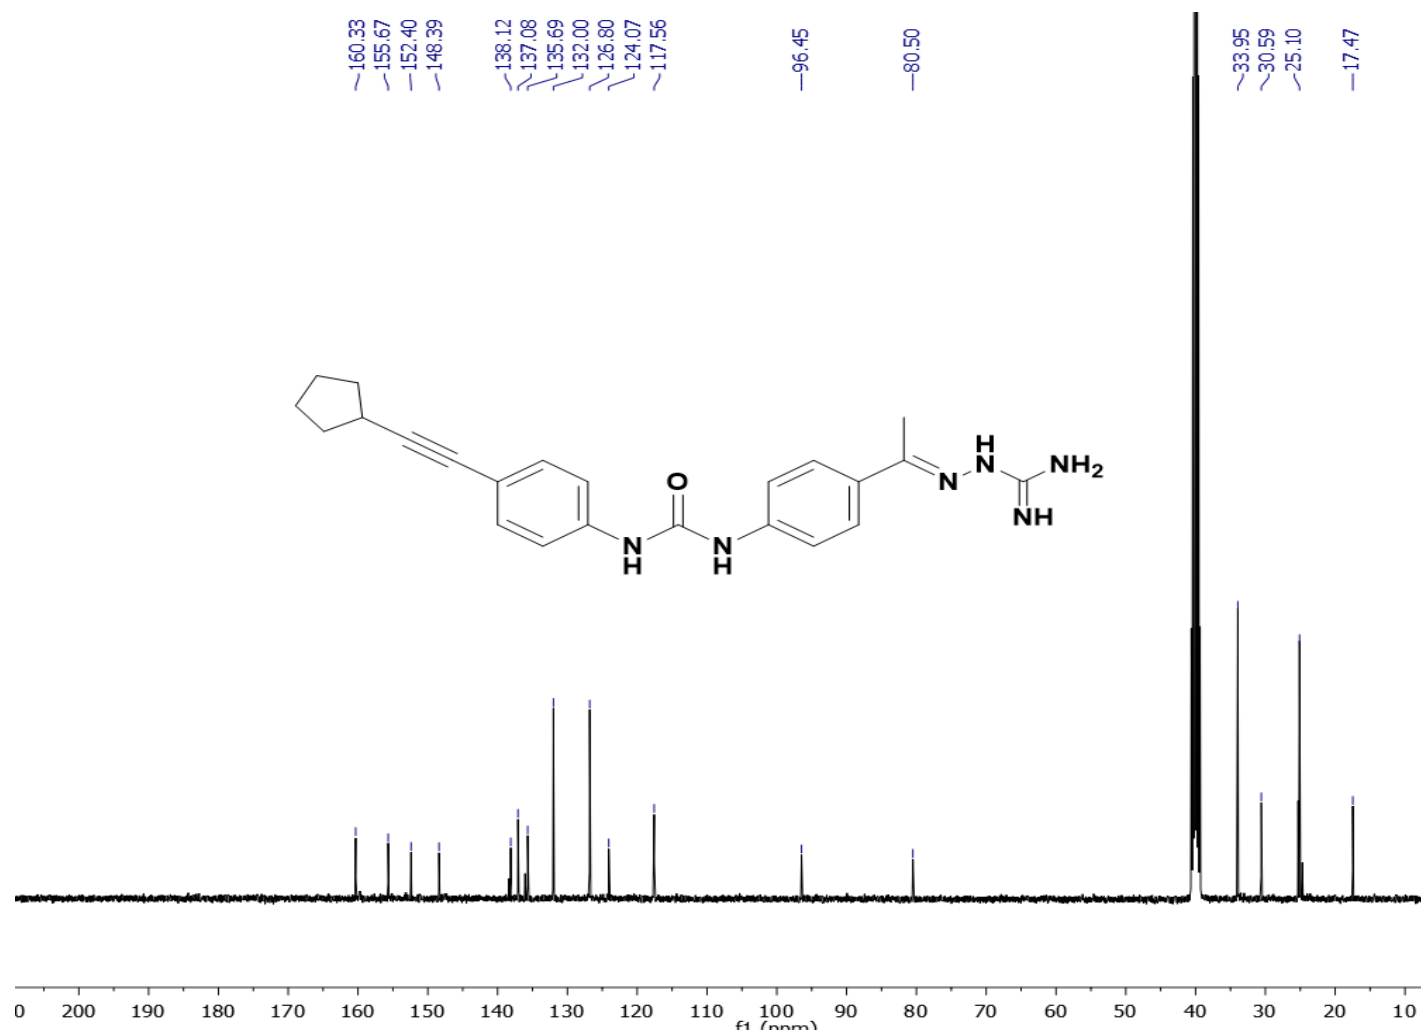

<sup>13</sup>C of compound (12)

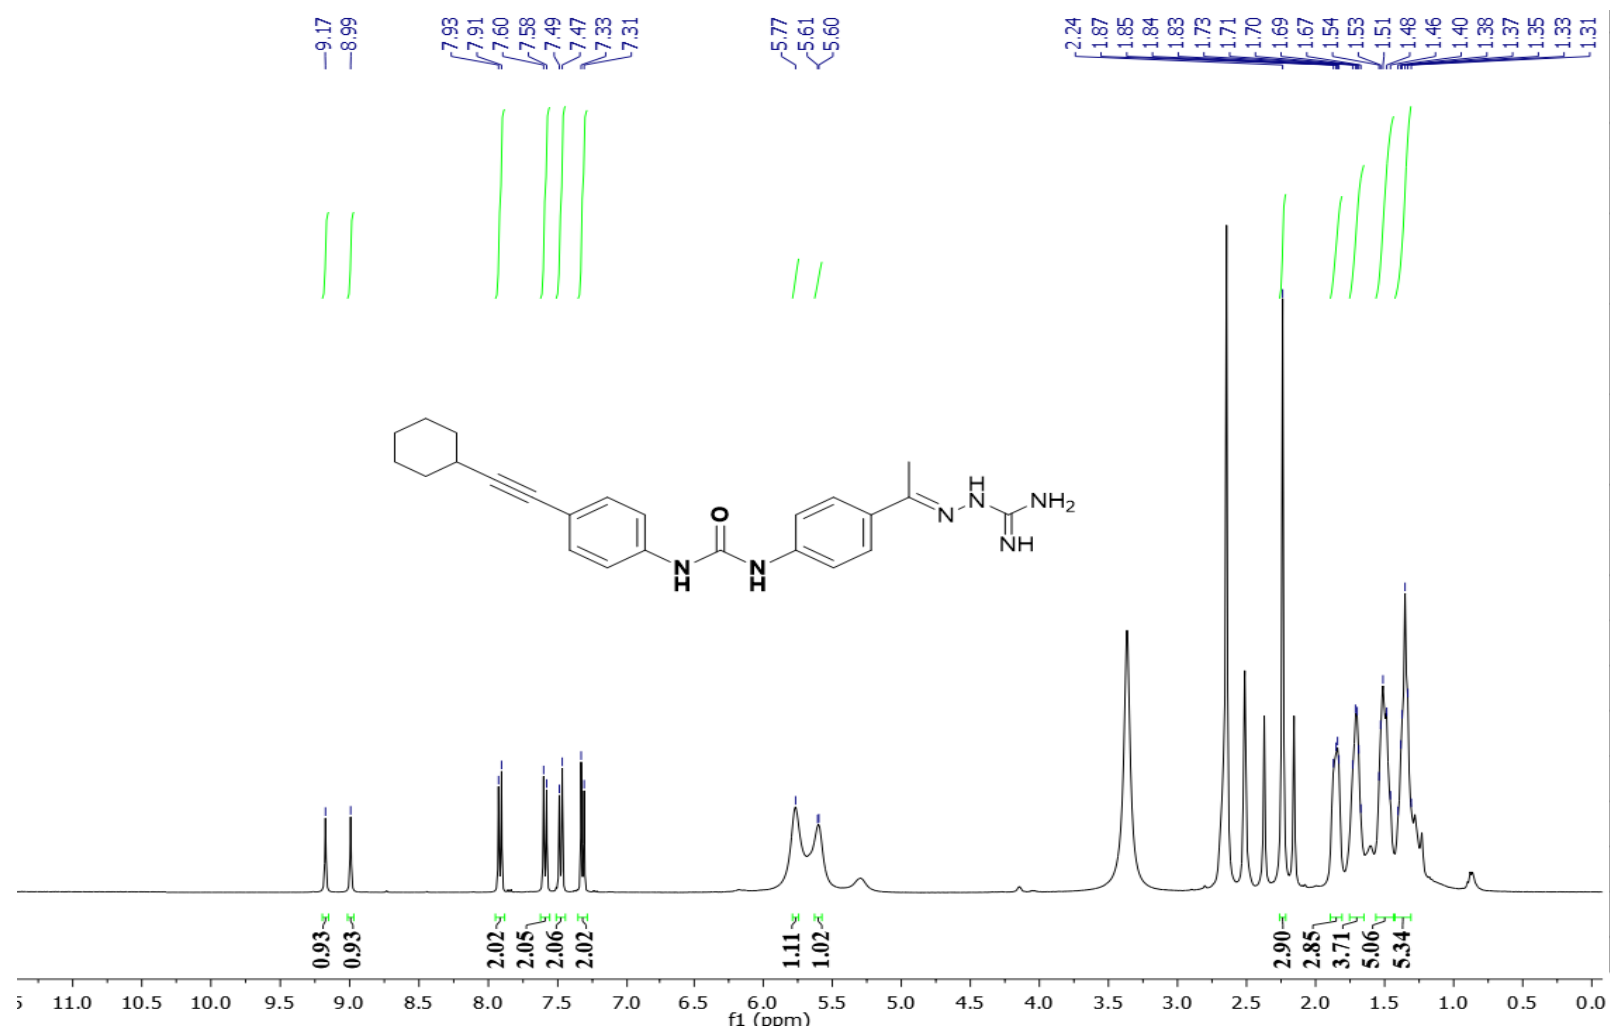

<sup>1</sup>H NMR of compound (13)



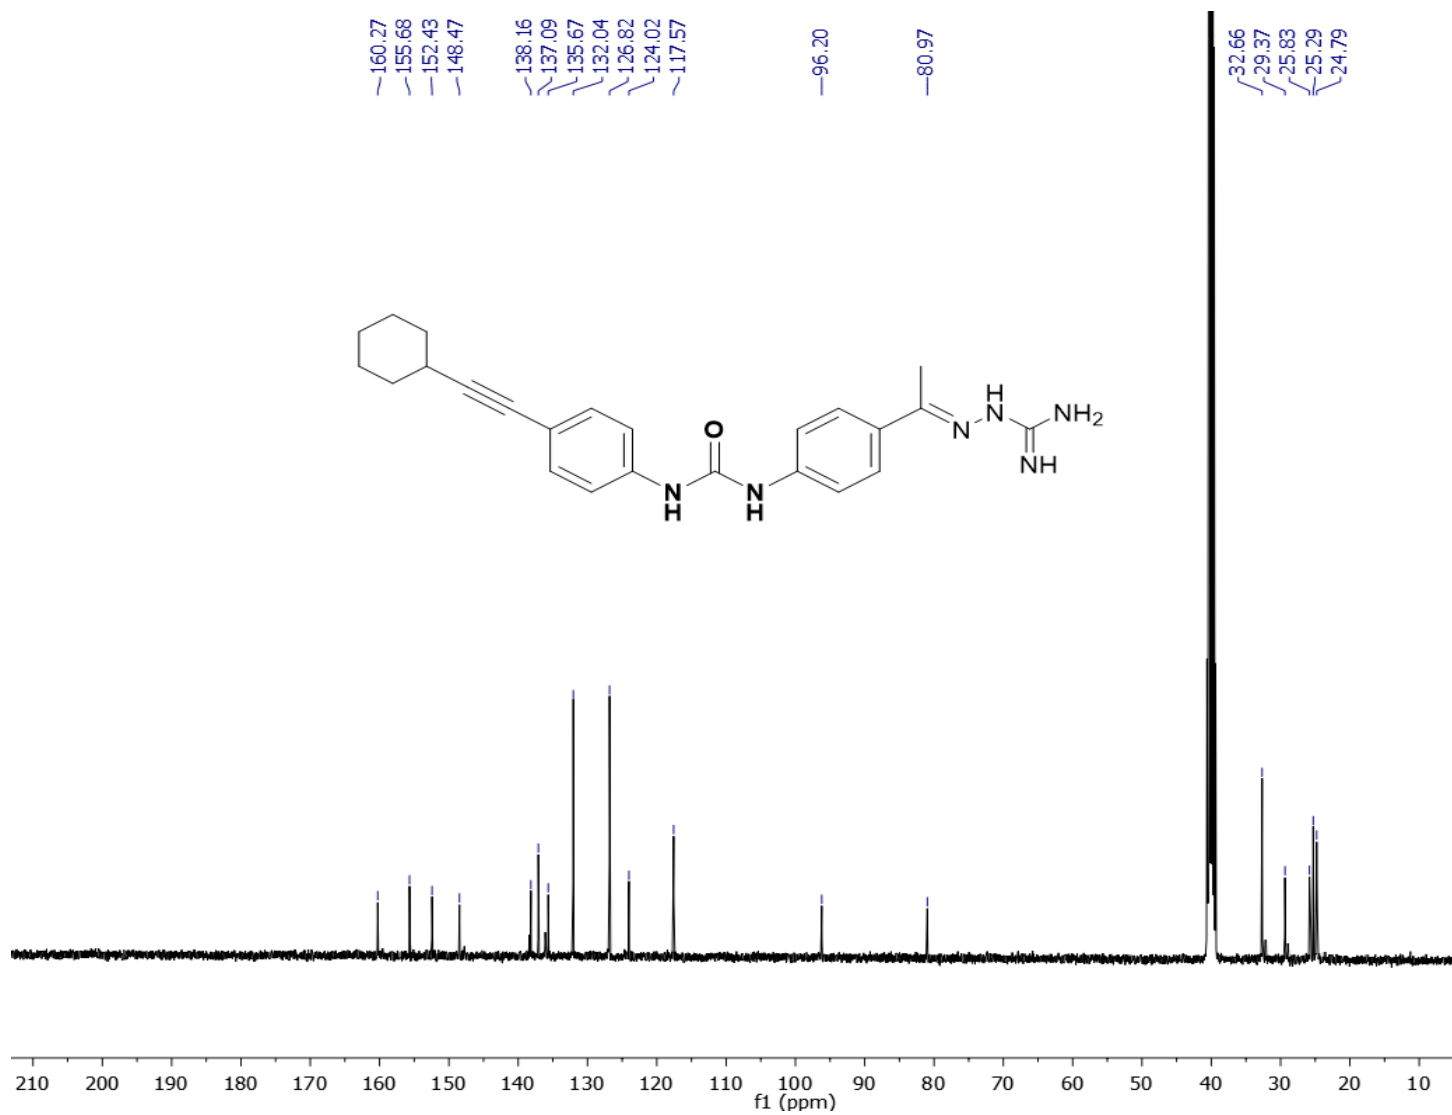

$^{13}\text{C}$  of compound (13)

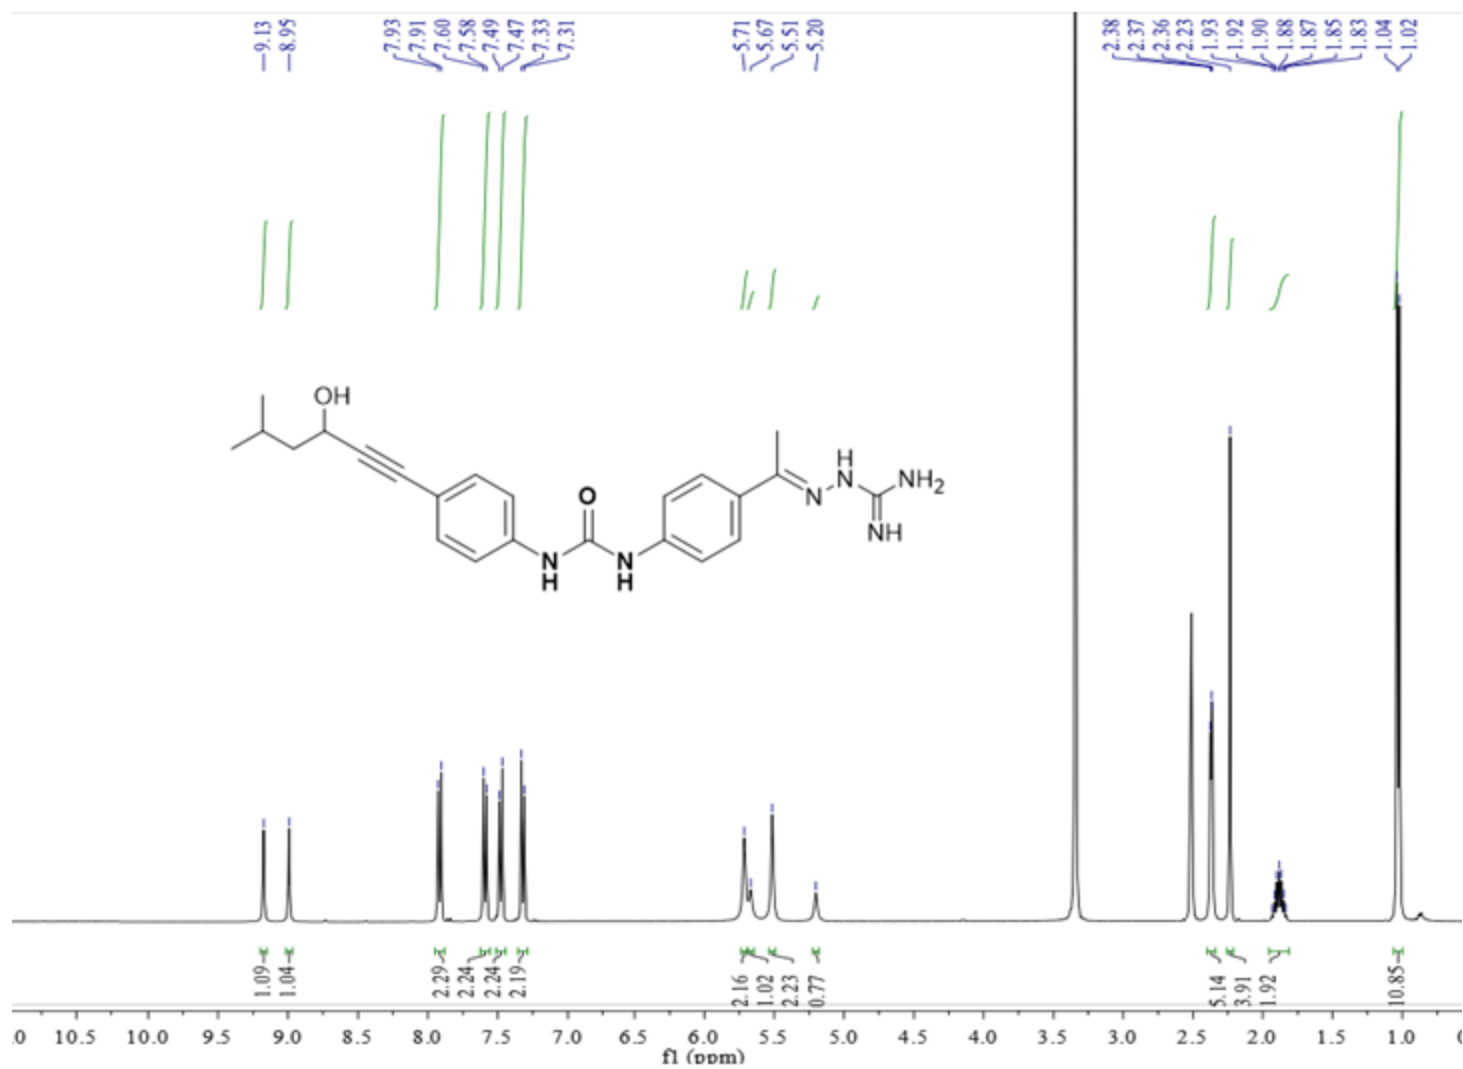

<sup>1</sup>H NMR of compound (14)

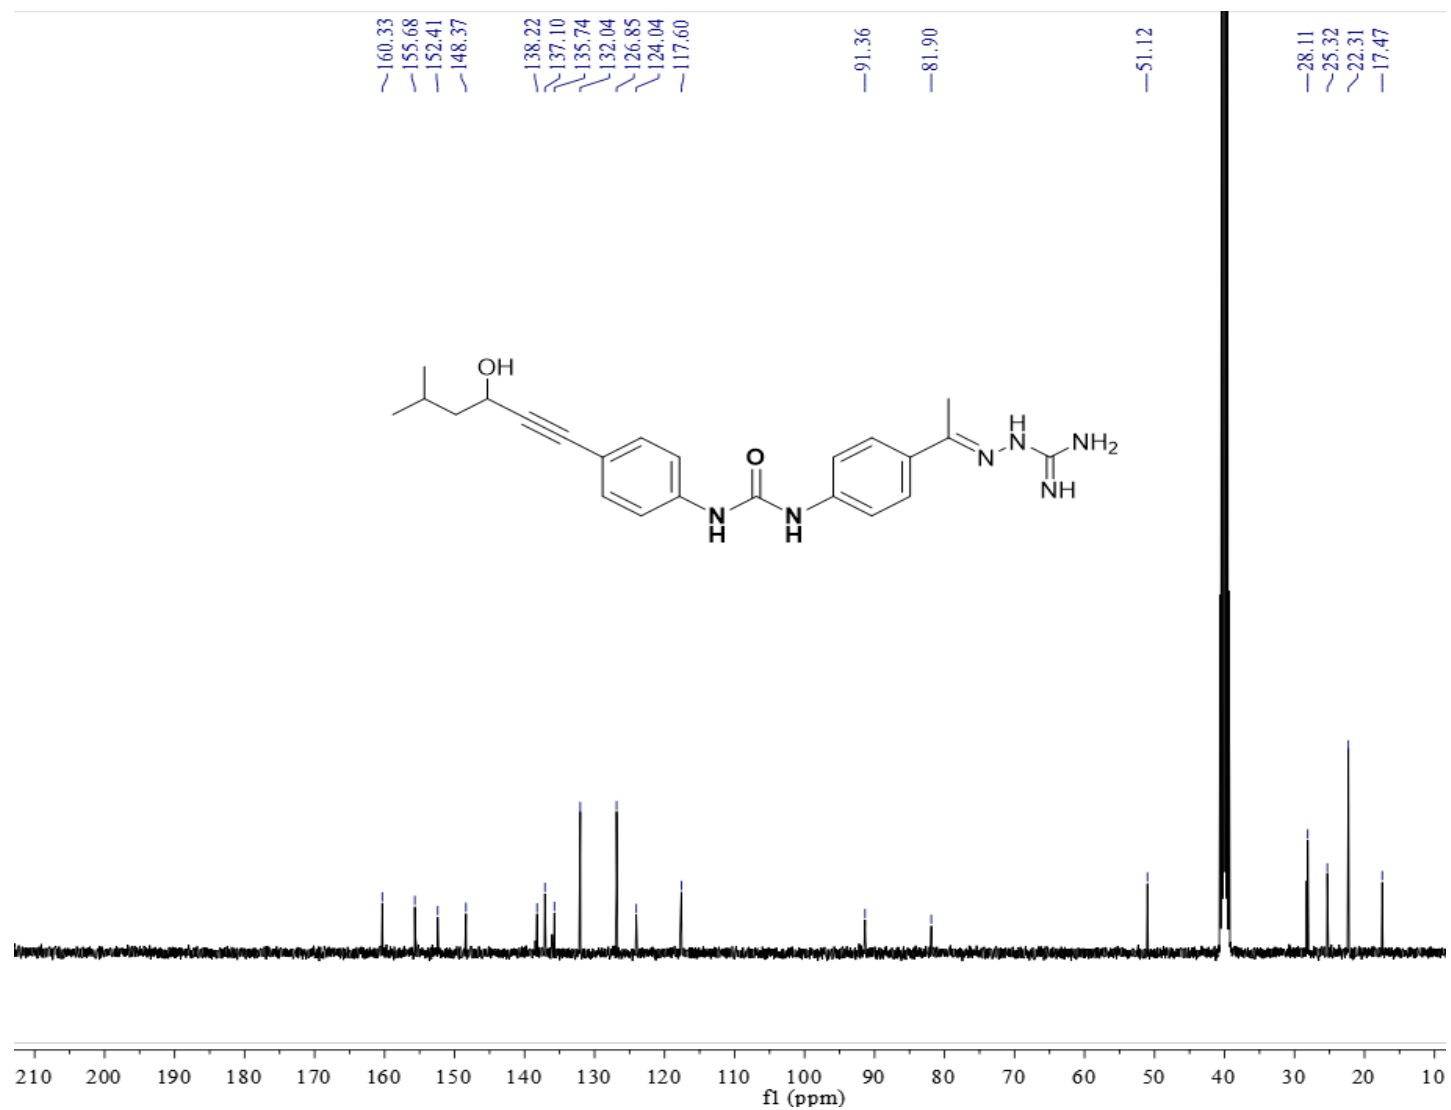

<sup>13</sup>C of compound (14)

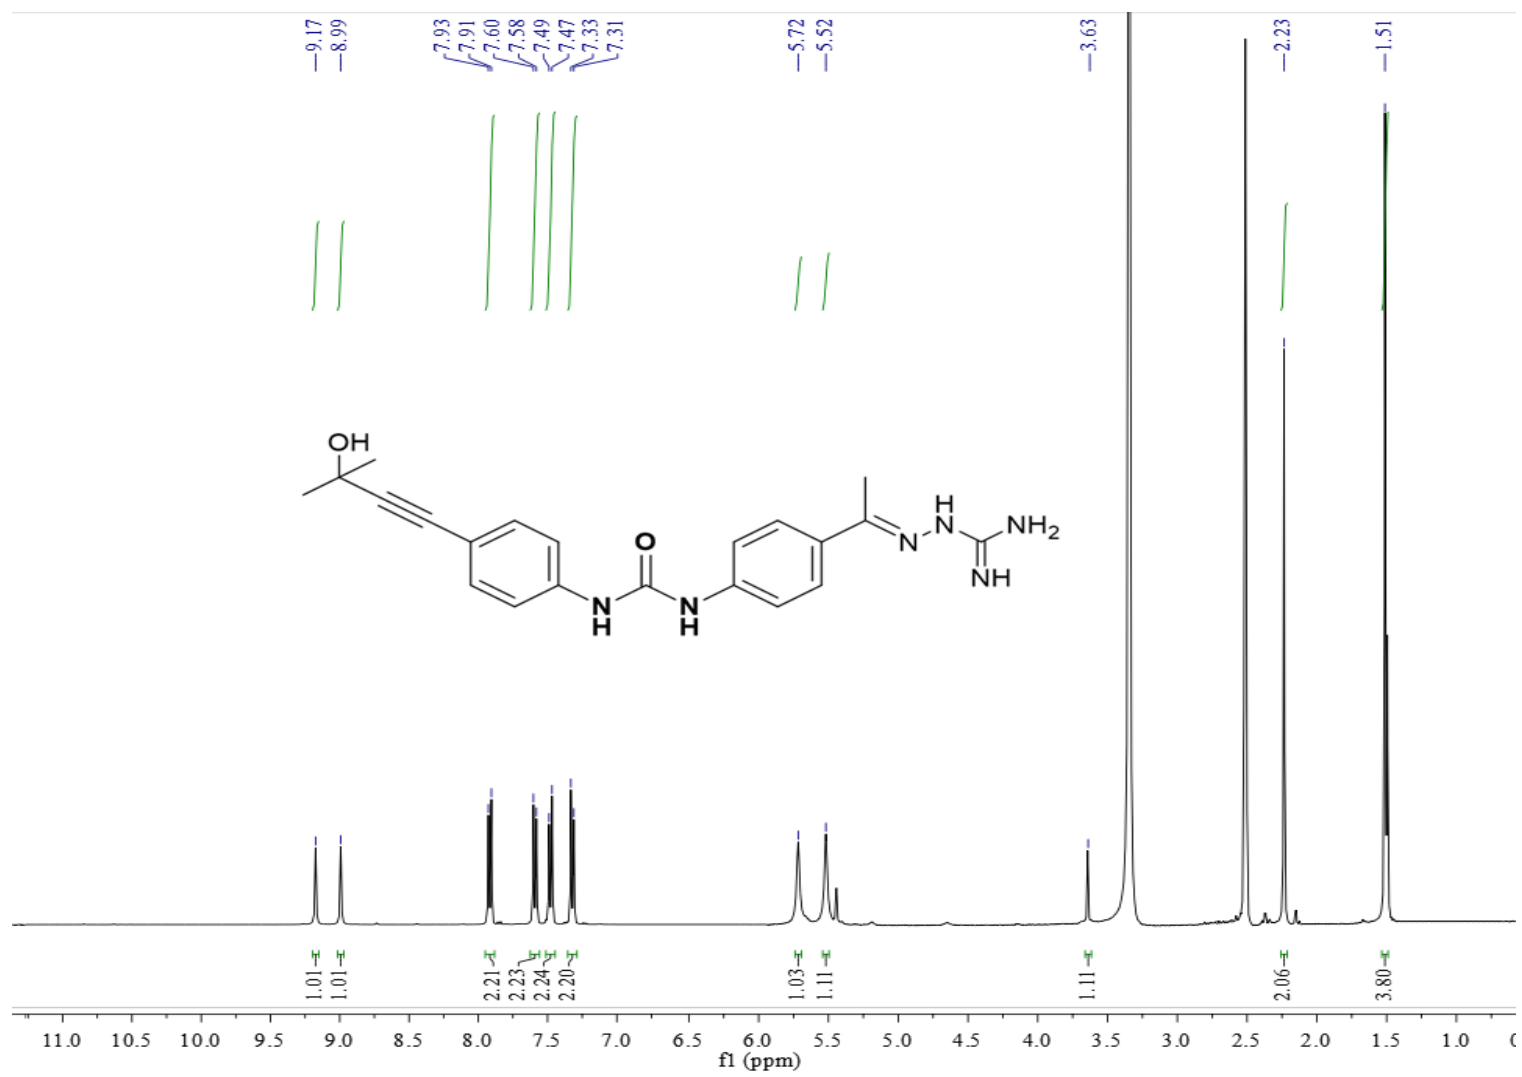

<sup>1</sup>H NMR of compound (15)

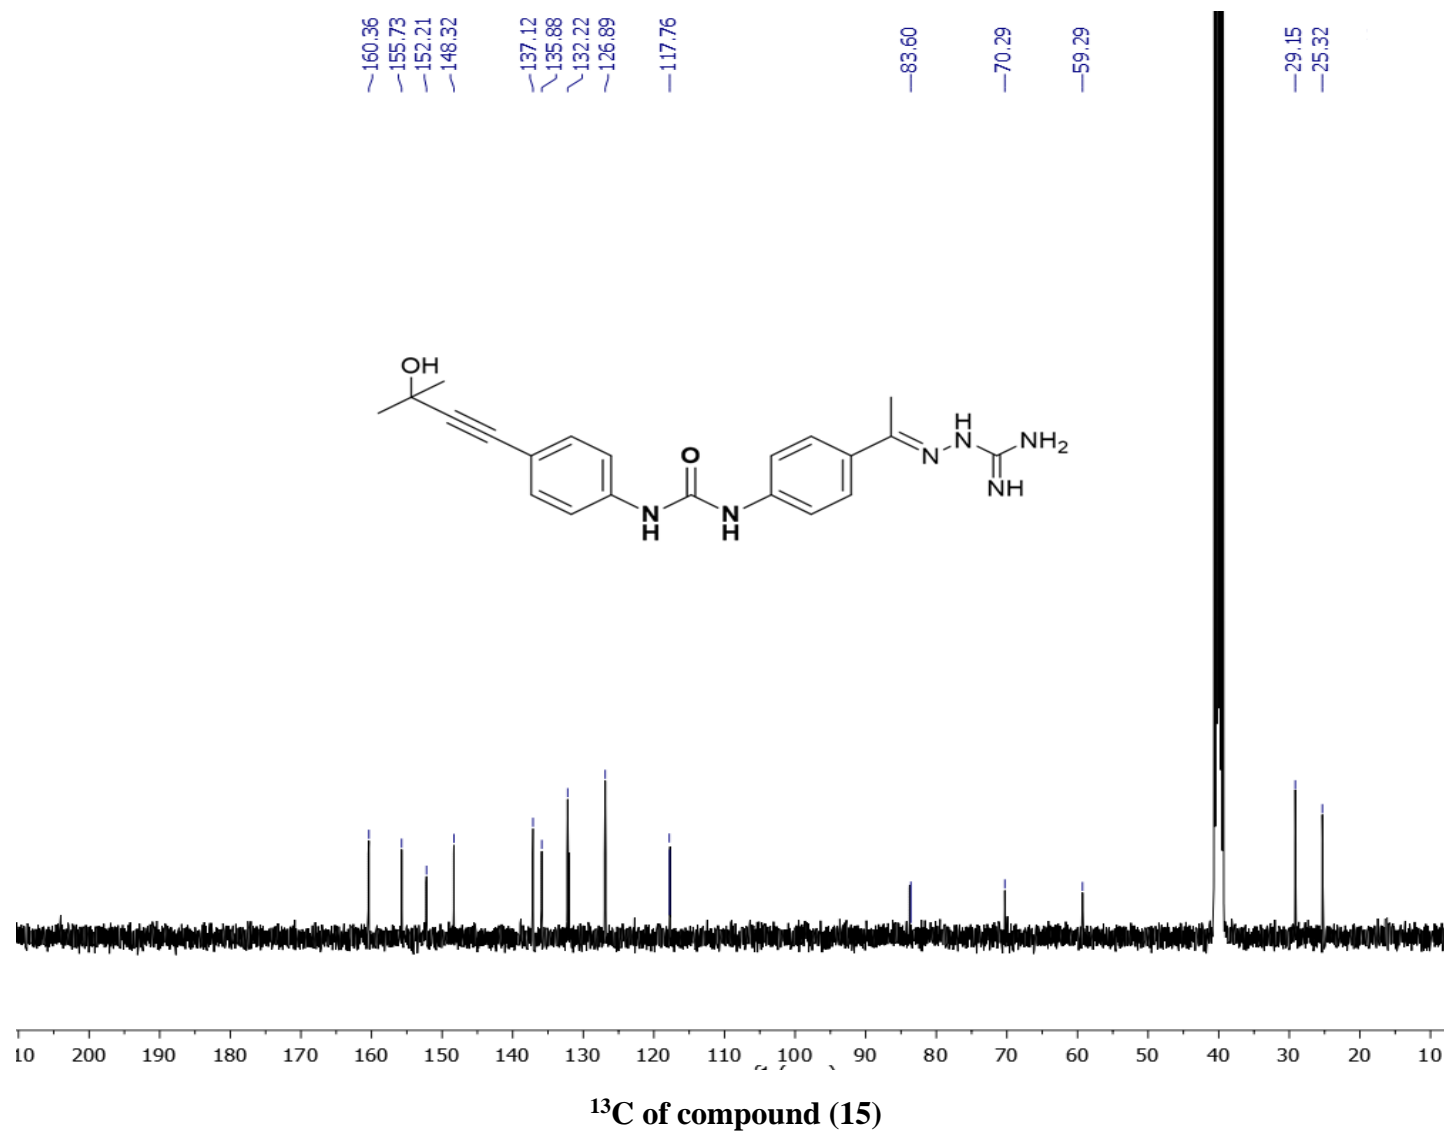

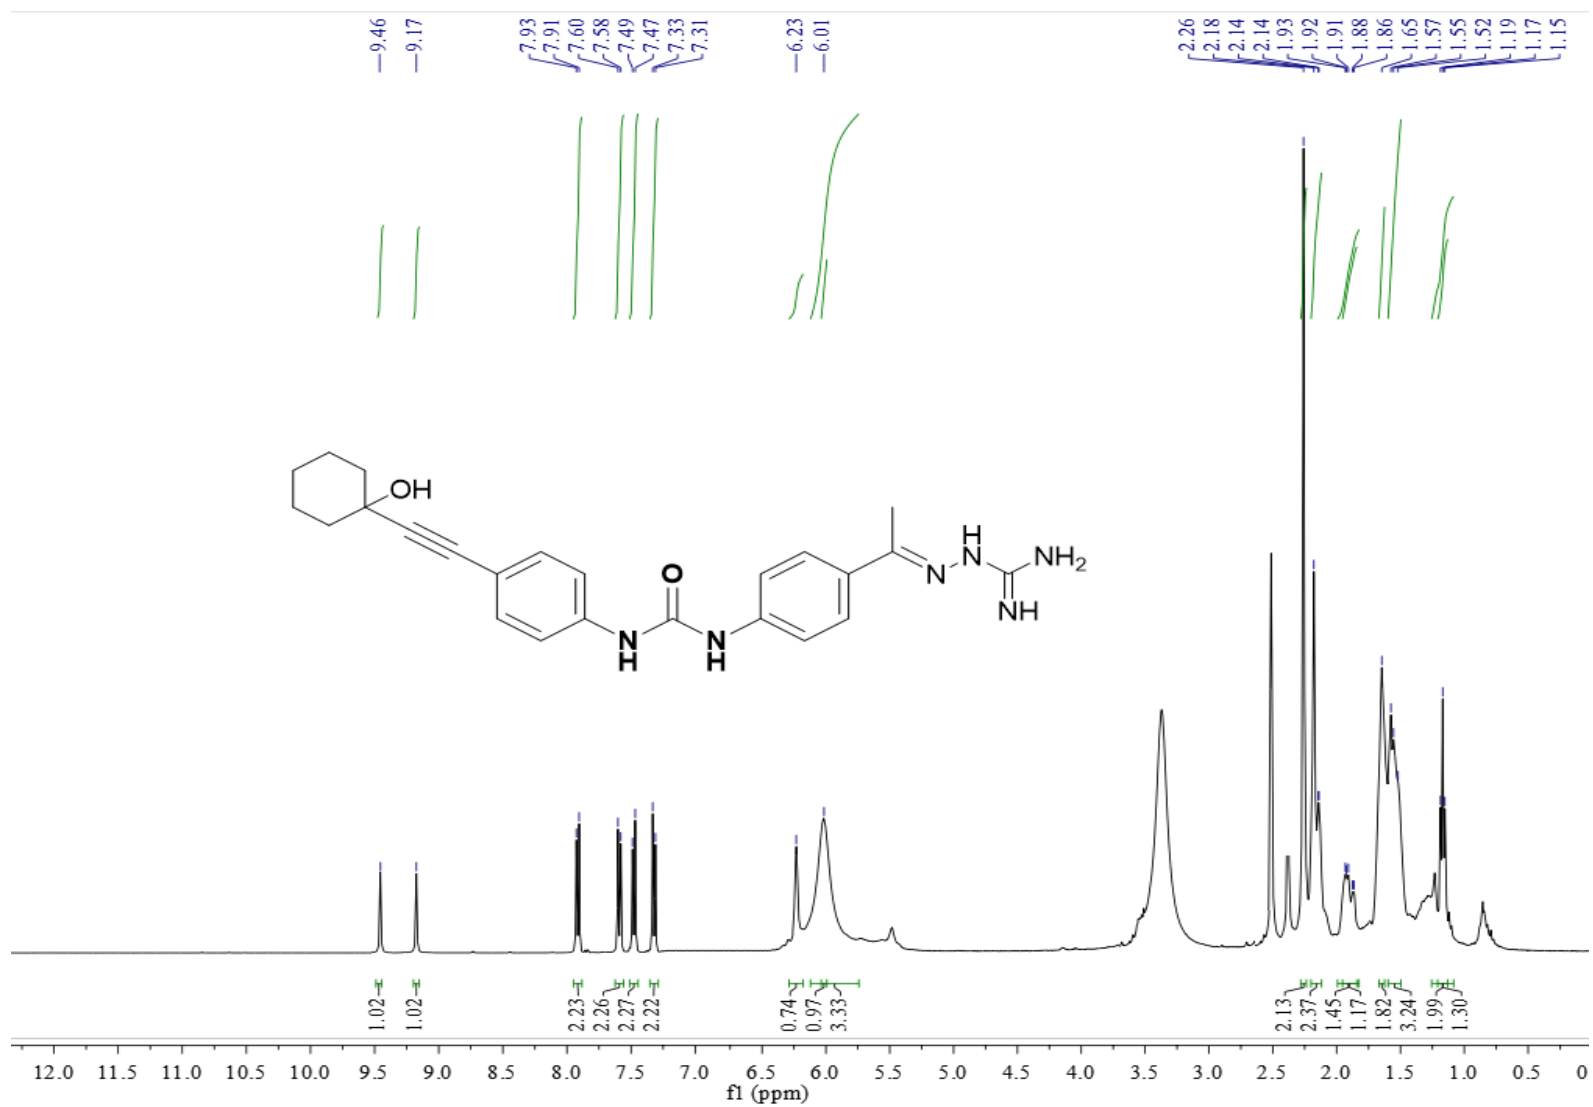

<sup>1</sup>H NMR of compound (16)

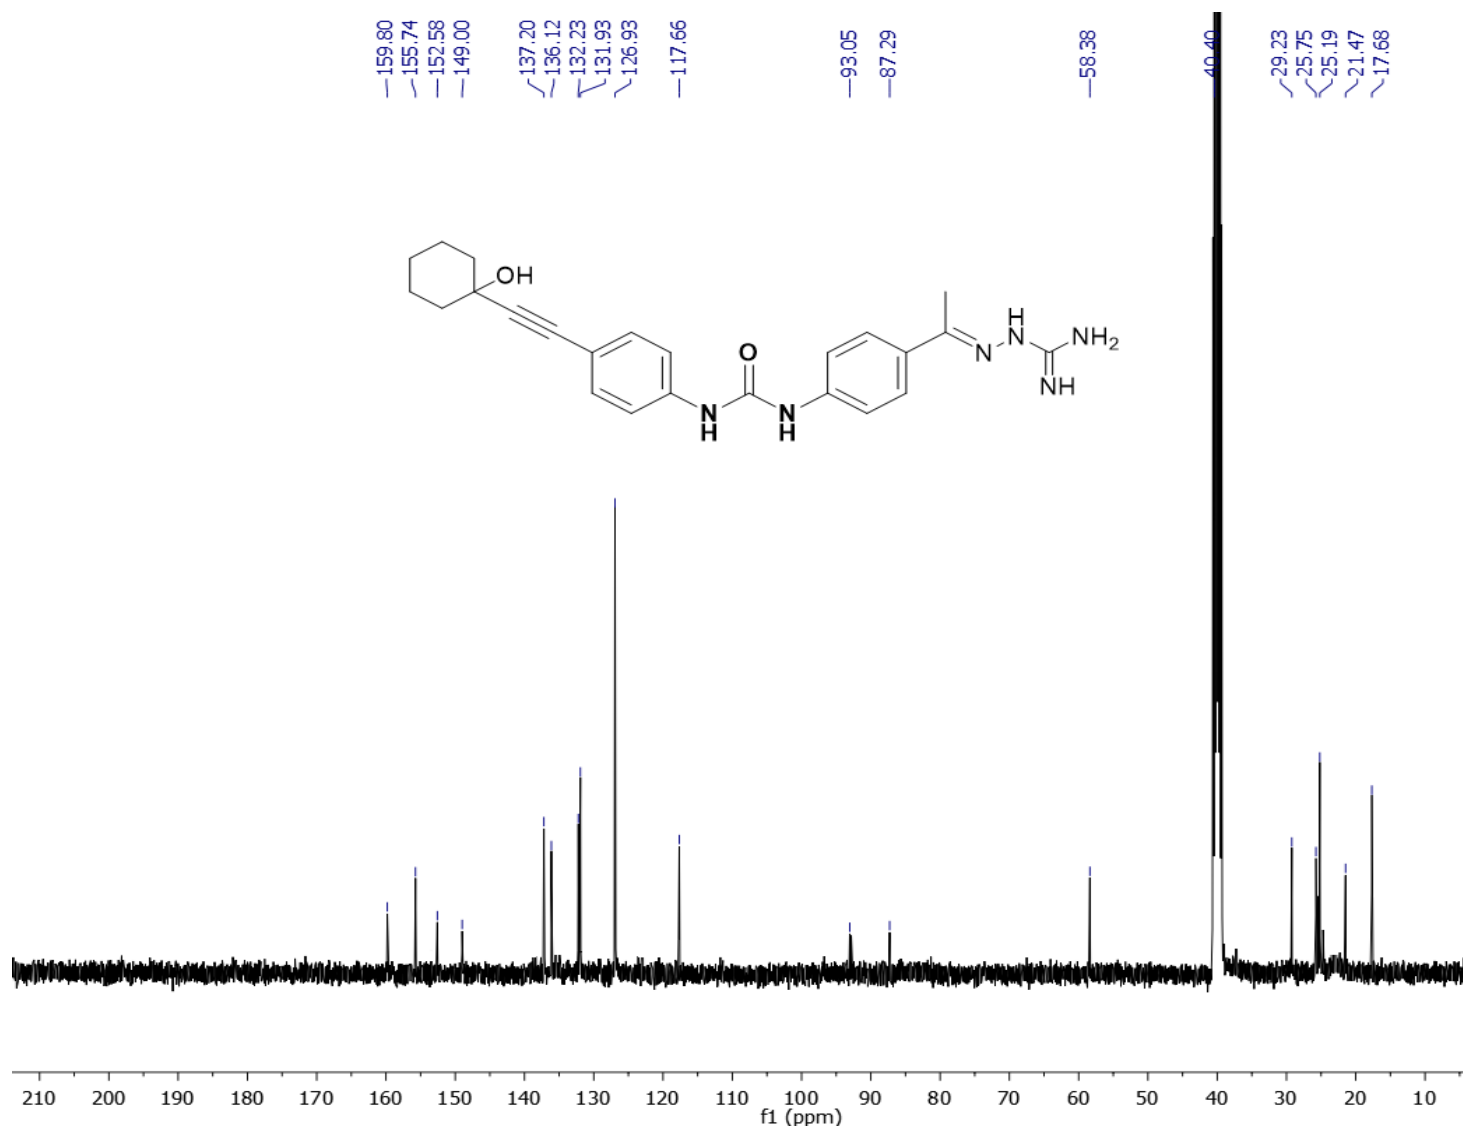

<sup>13</sup>C of compound (16)

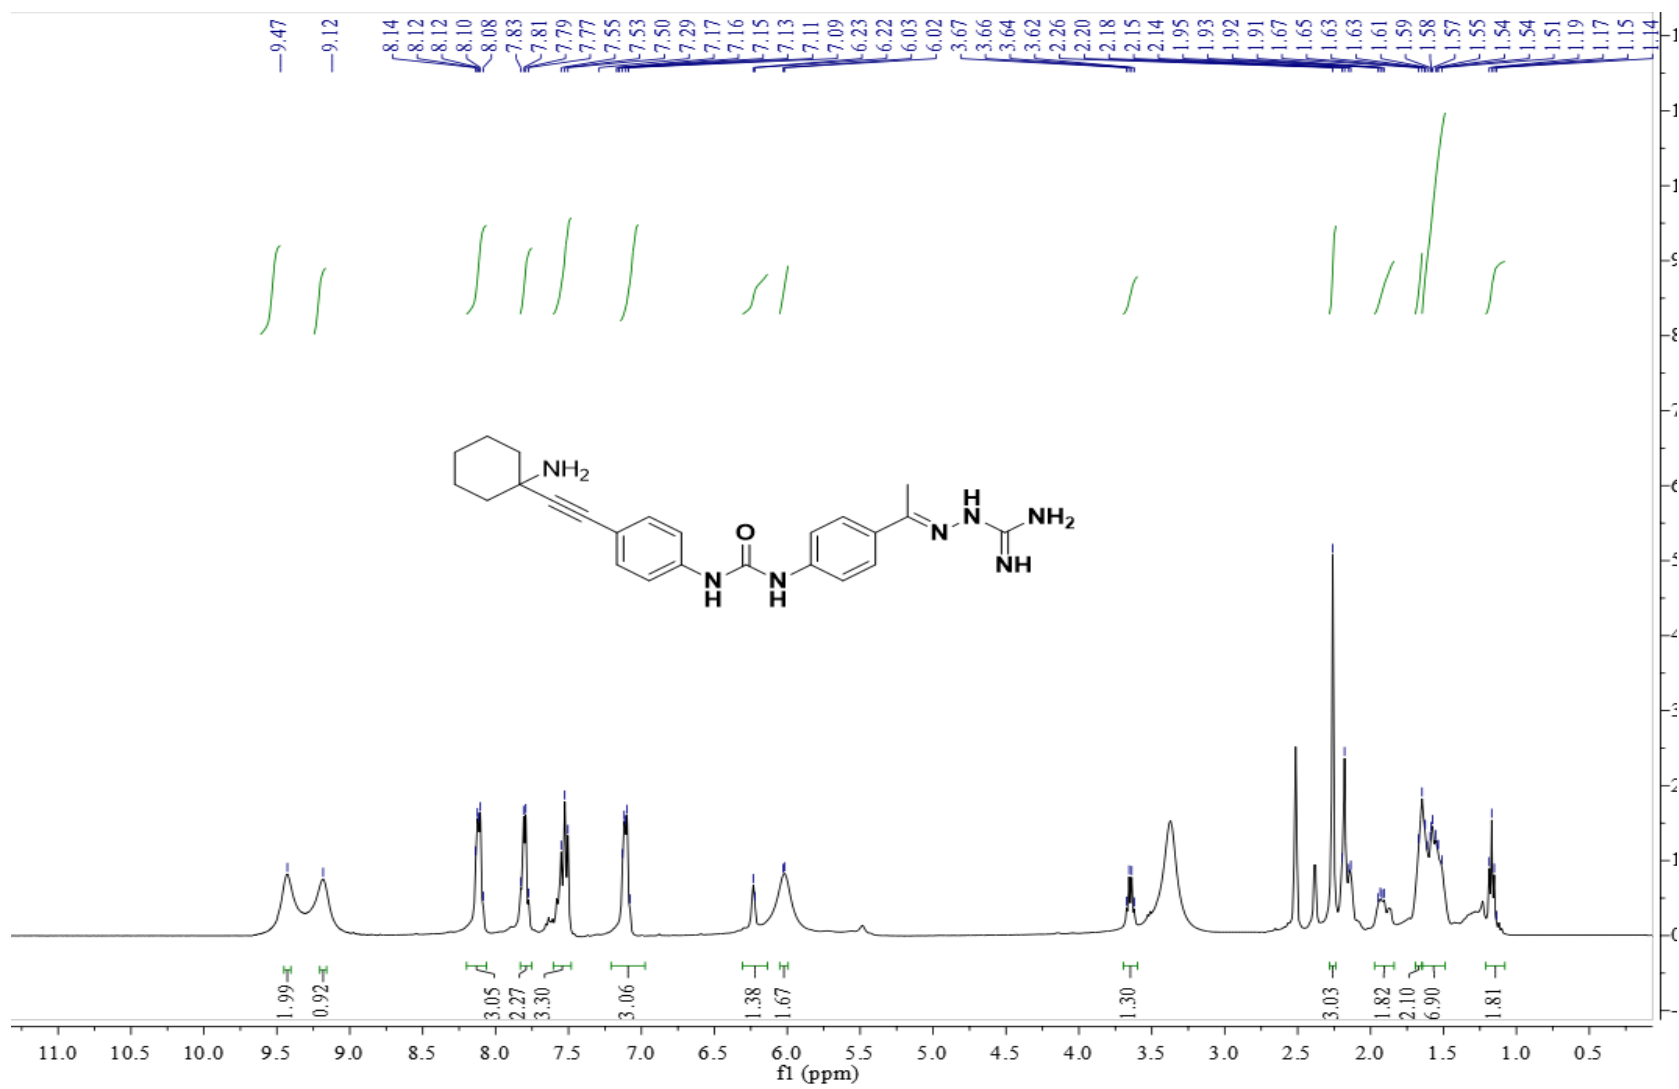

<sup>1</sup>H NMR of compound (17)



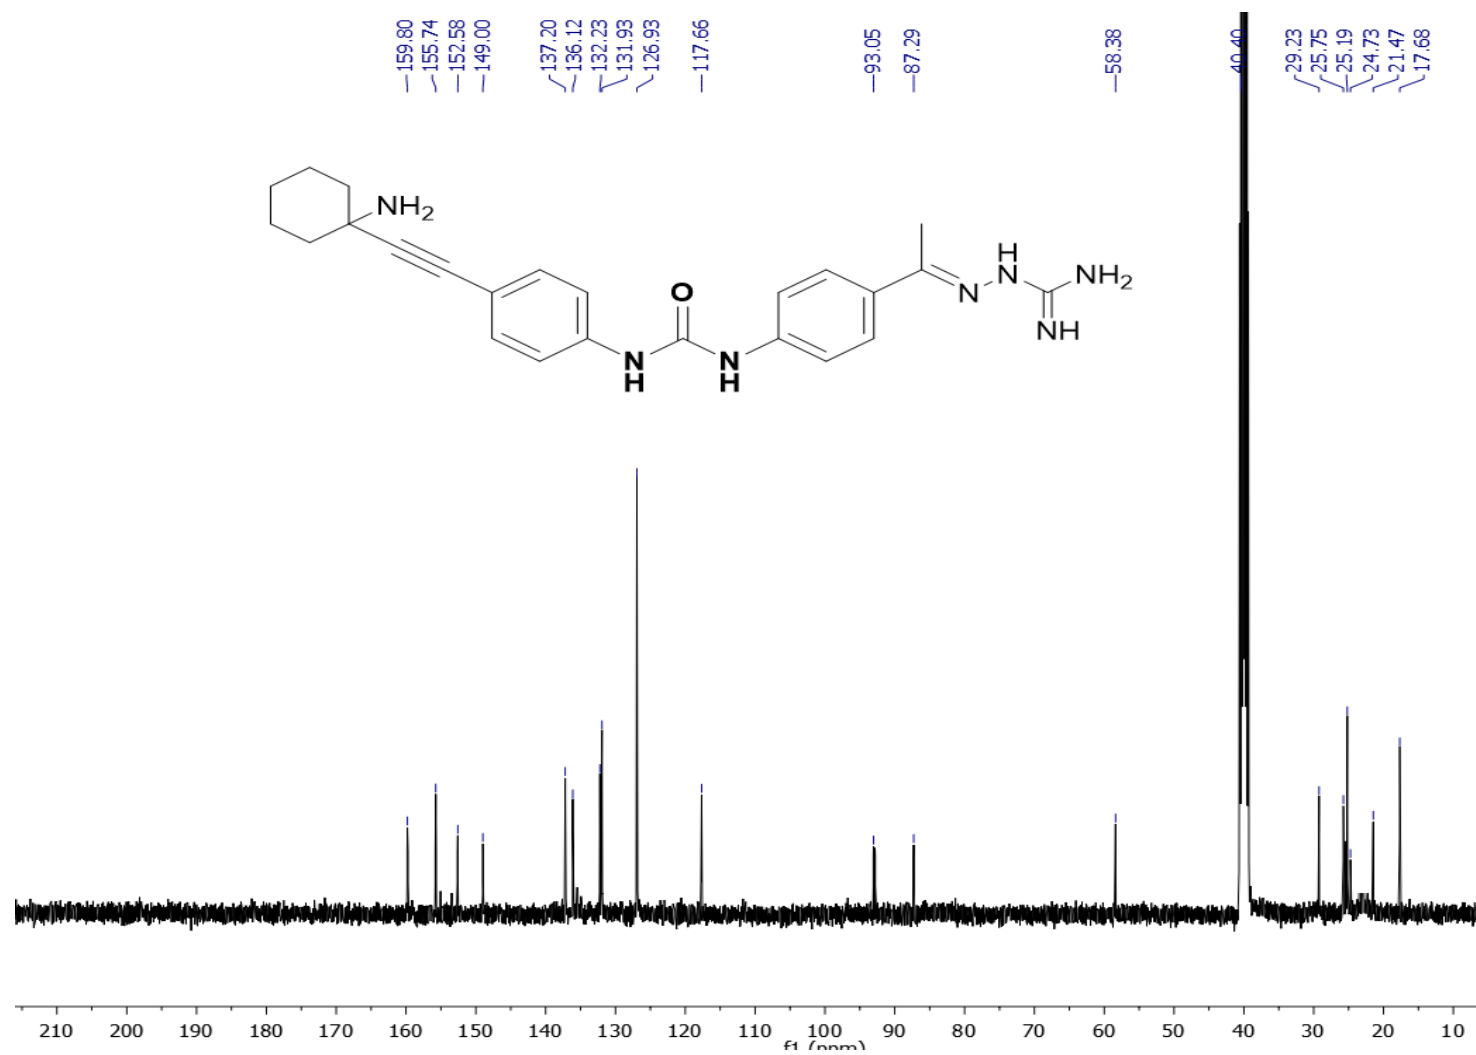

<sup>13</sup>C of compound (17)

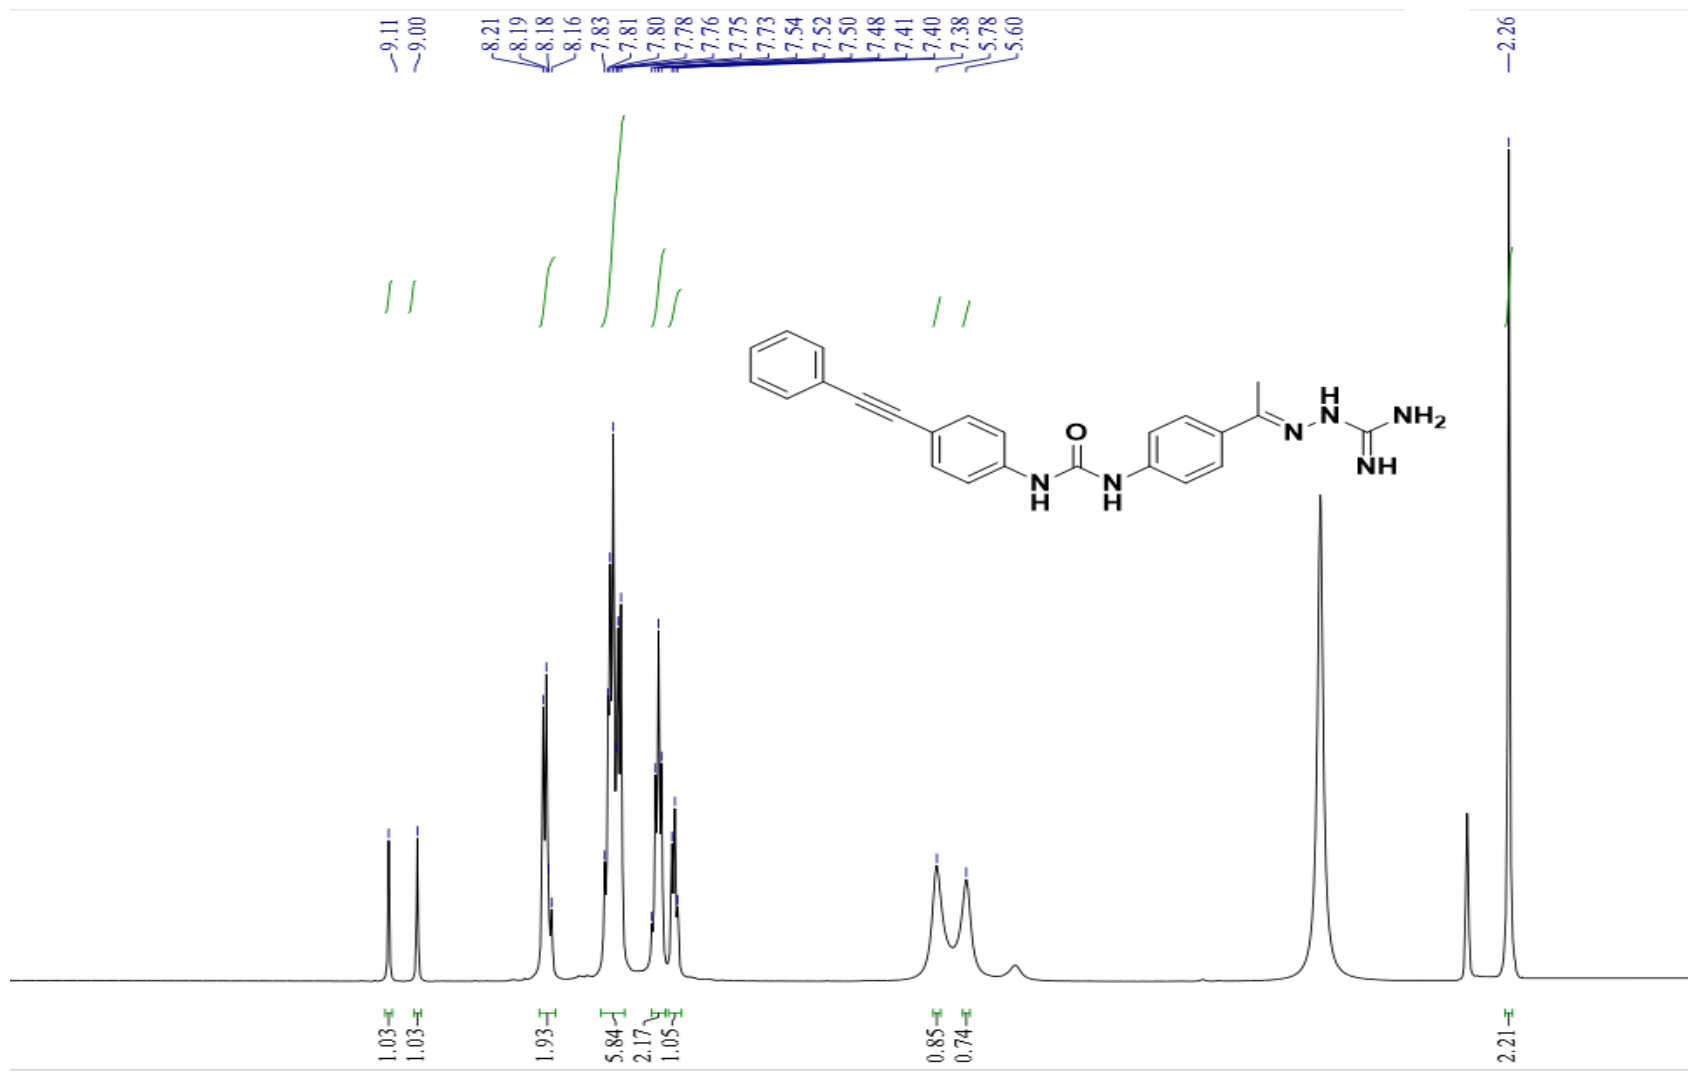

<sup>1</sup>H NMR of compound (18)

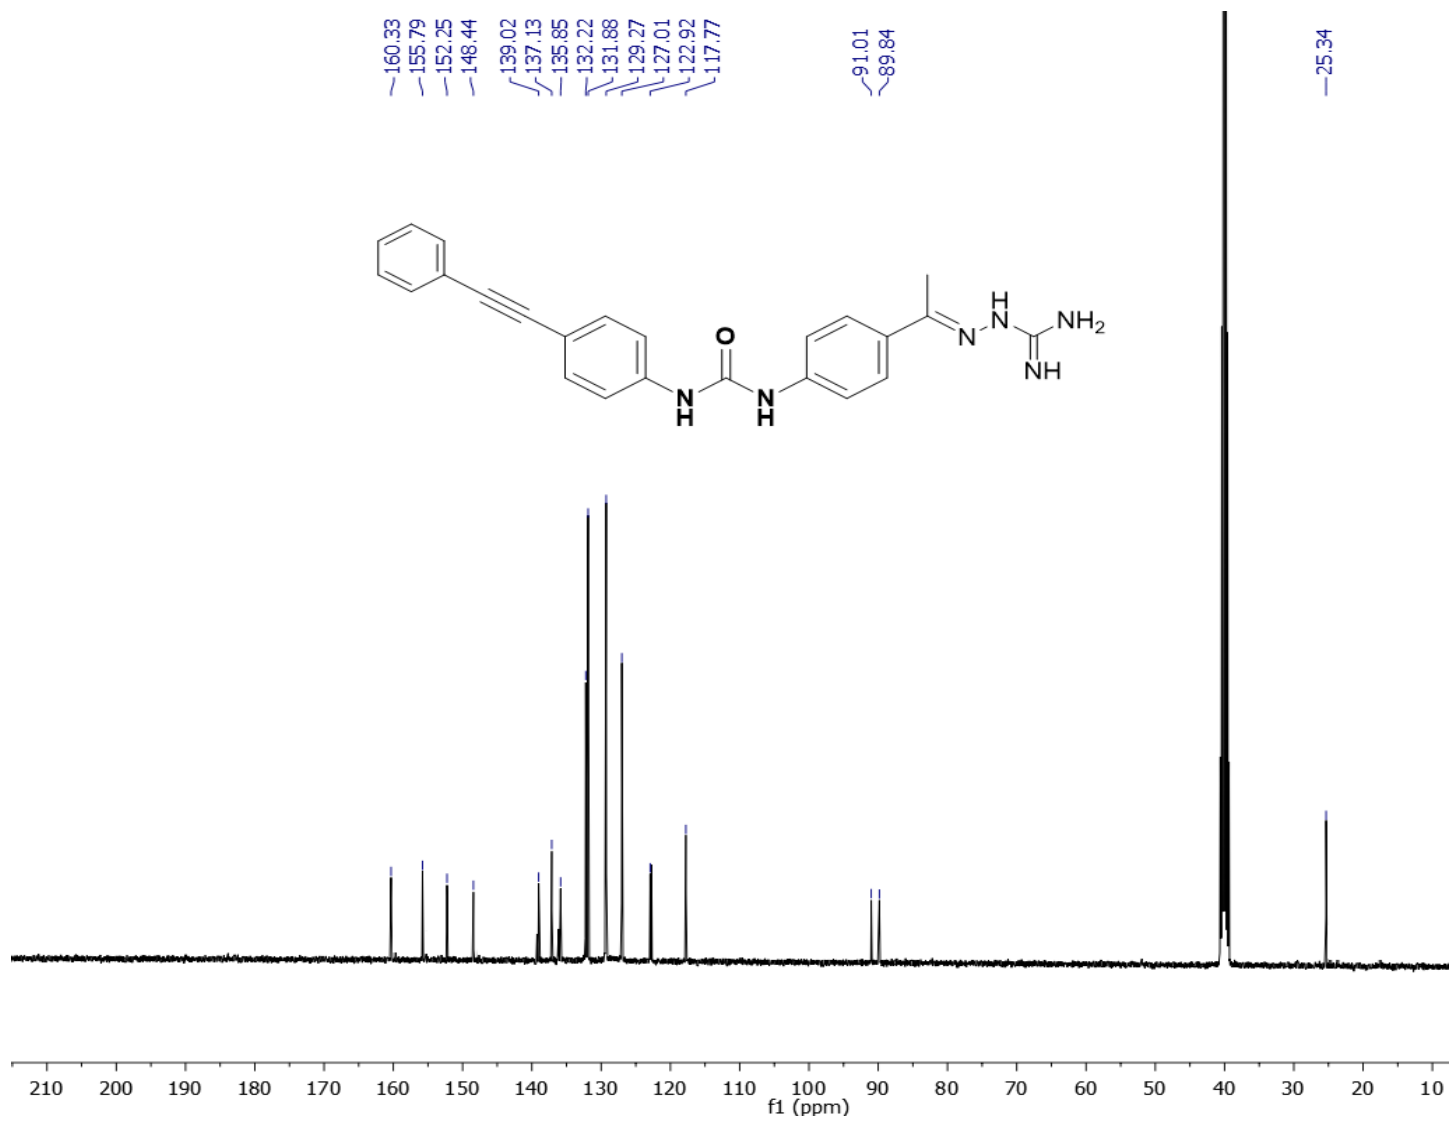

<sup>13</sup>C of compound (18)

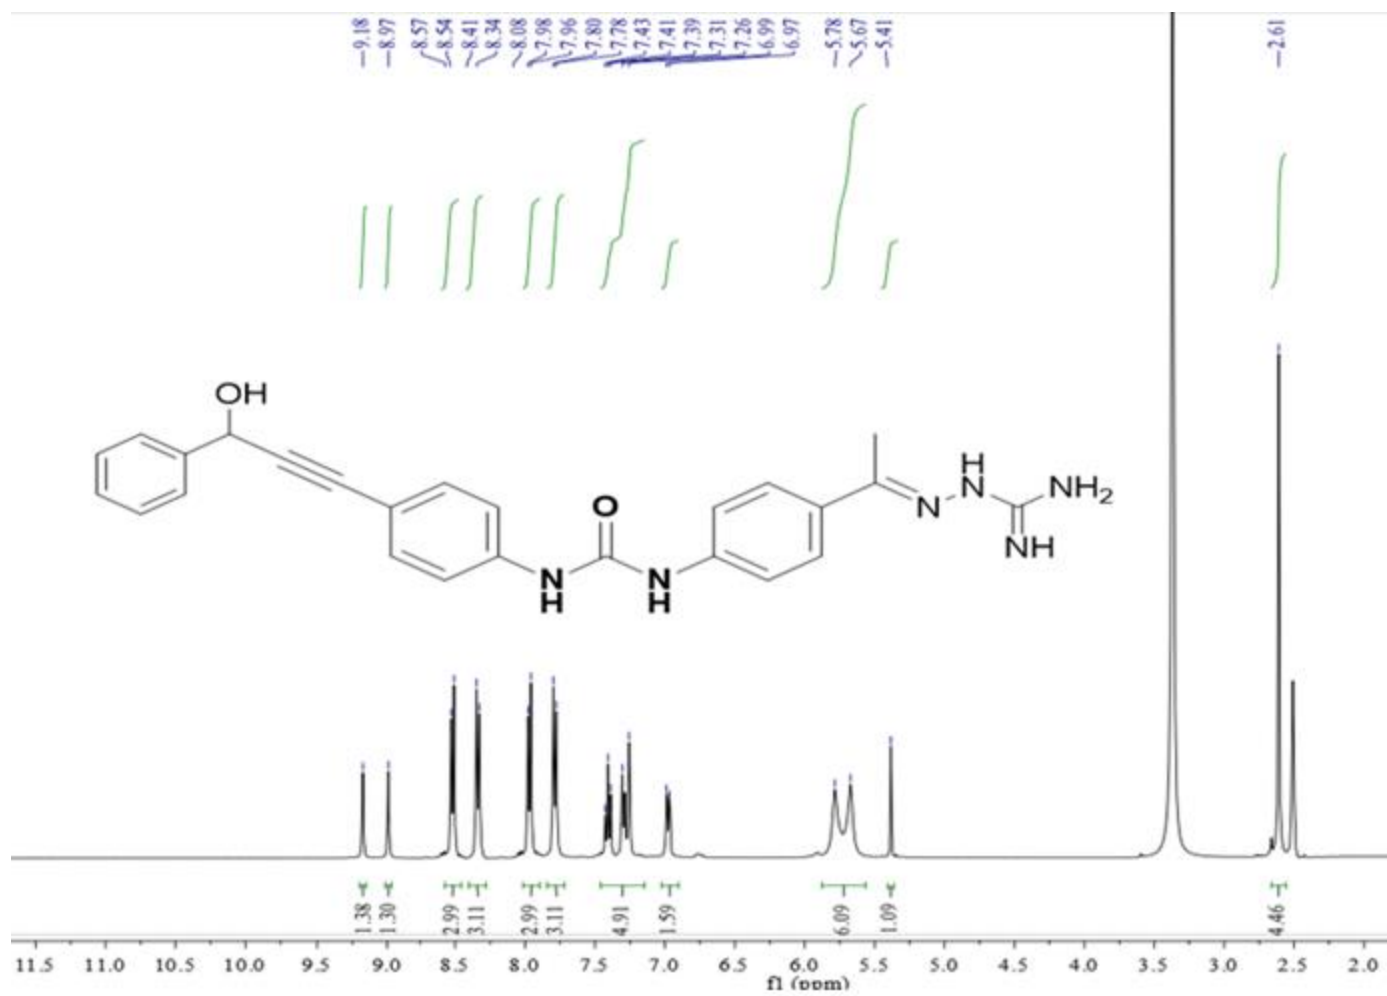

<sup>1</sup>H NMR of compound (19)

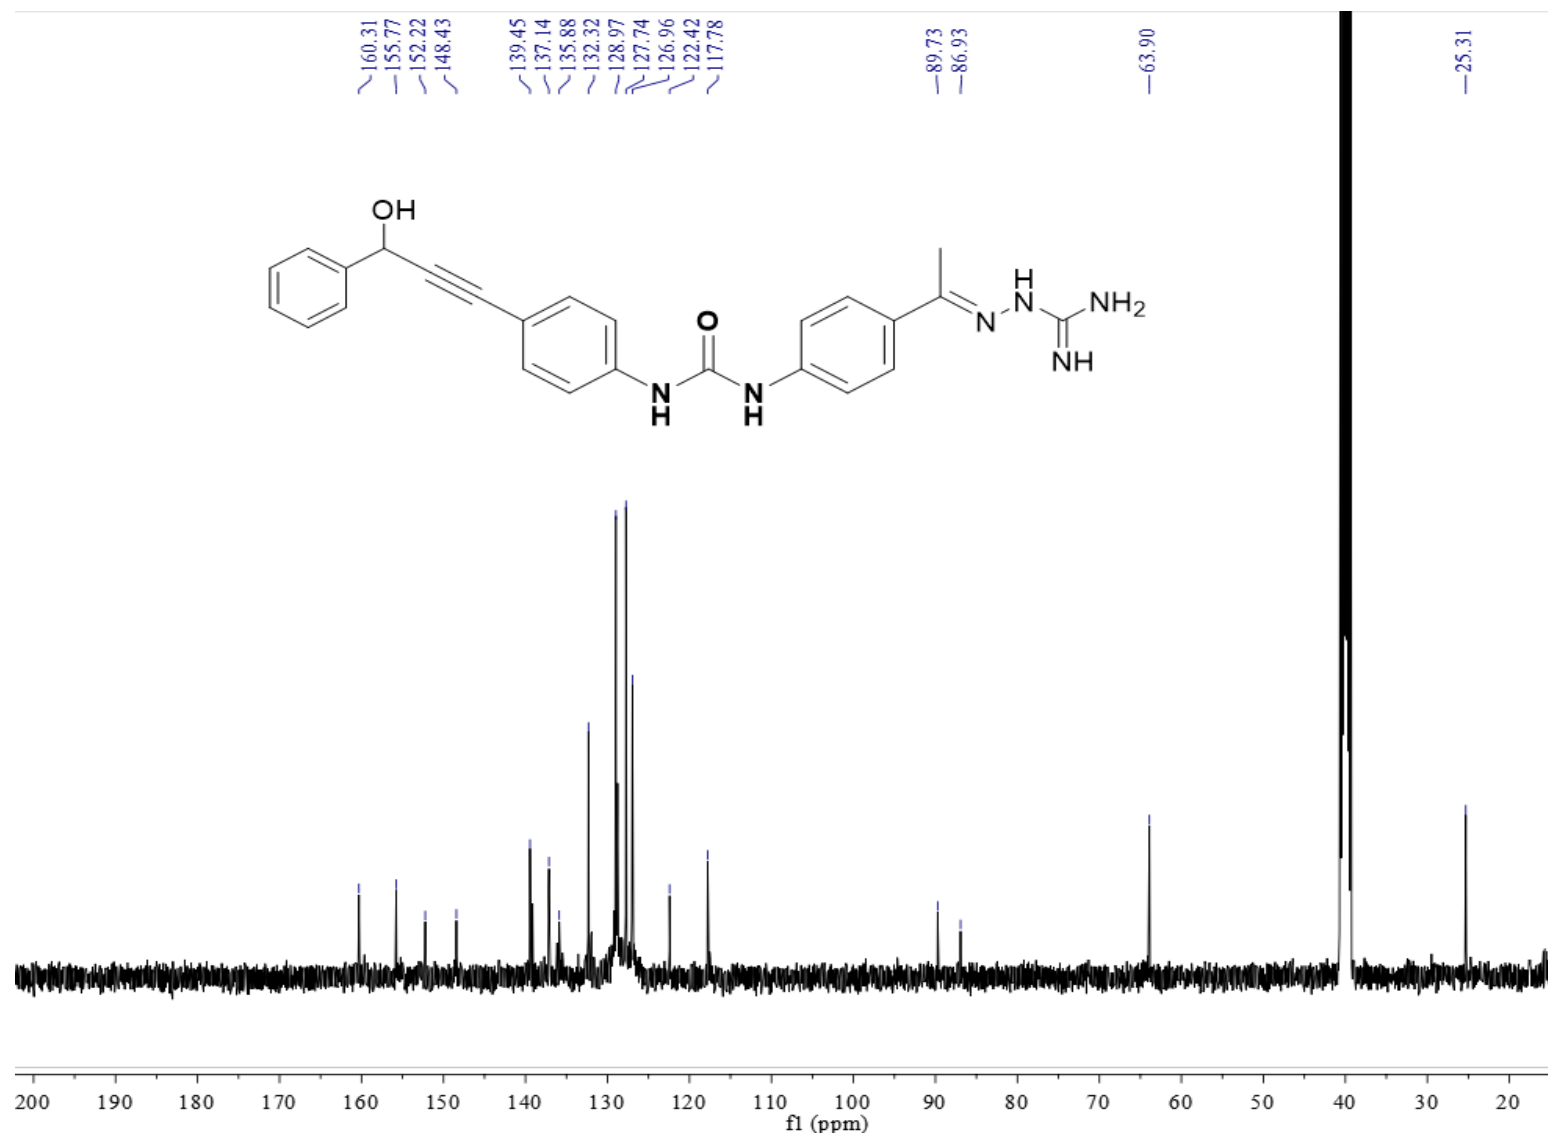

<sup>13</sup>C of compound (19)

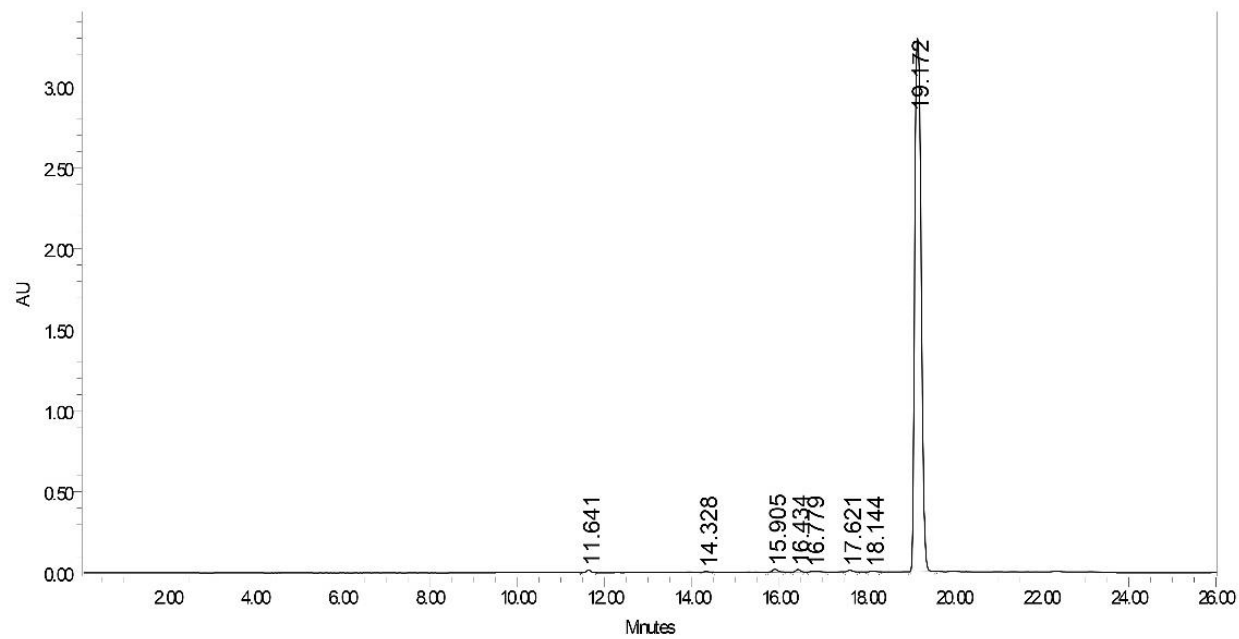

|   | RT     | Area     | %Area | Hight   |
|---|--------|----------|-------|---------|
| 1 | 11.641 | 111086   | 0.32  | 16902   |
| 2 | 14.328 | 34834    | 0.10  | 5515    |
| 3 | 15.905 | 147448   | 0.43  | 17126   |
| 4 | 16.434 | 116555   | 0.34  | 15682   |
| 5 | 16.779 | 92146    | 0.27  | 6877    |
| 6 | 17.621 | 73783    | 0.22  | 9594    |
| 7 | 18.144 | 40526    | 0.12  | 5381    |
| 8 | 19.172 | 33599443 | 98.20 | 3300551 |

**HPLC chromatogram of compound (18)**
